# Supplementary material for: Causal relationships between genetically determined metabolites and human intelligence: a Mendelian randomization study
Source: Springer Nature journal article supplement (doi:10.1186/s13041-021-00743-4), 2021-02-09

**a. Funnel plot for 5-oxoproline**

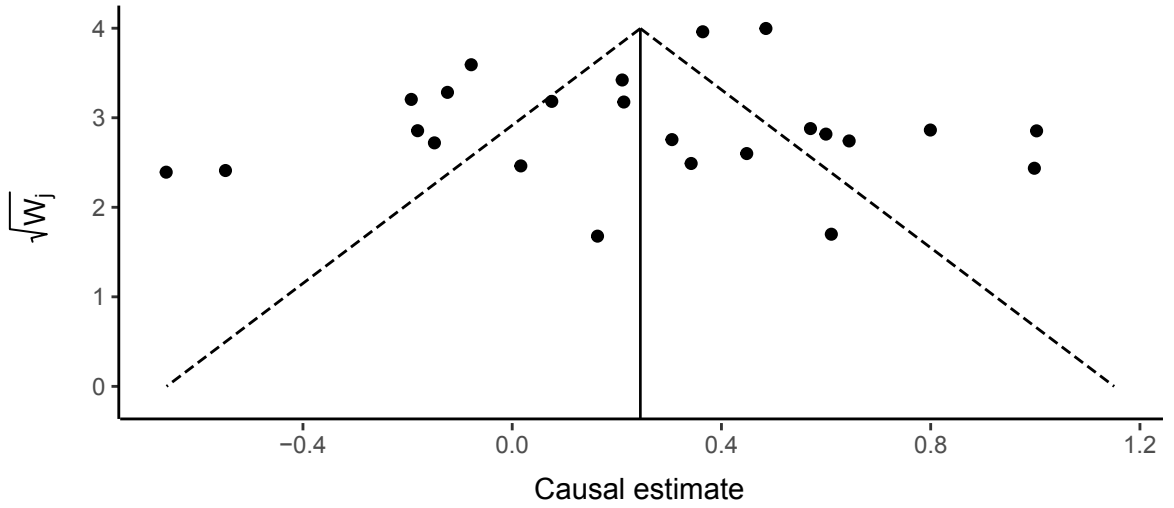

**b. Funnel plot for dihomo-linoleate (20:2n6)**

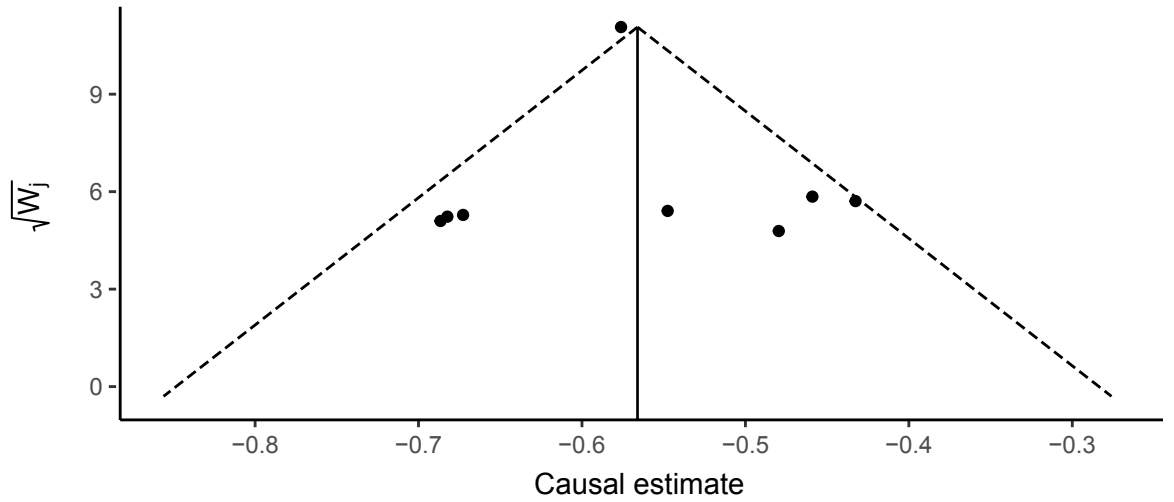

**c. Funnel plot for p-acetamidophenylglucuronide**

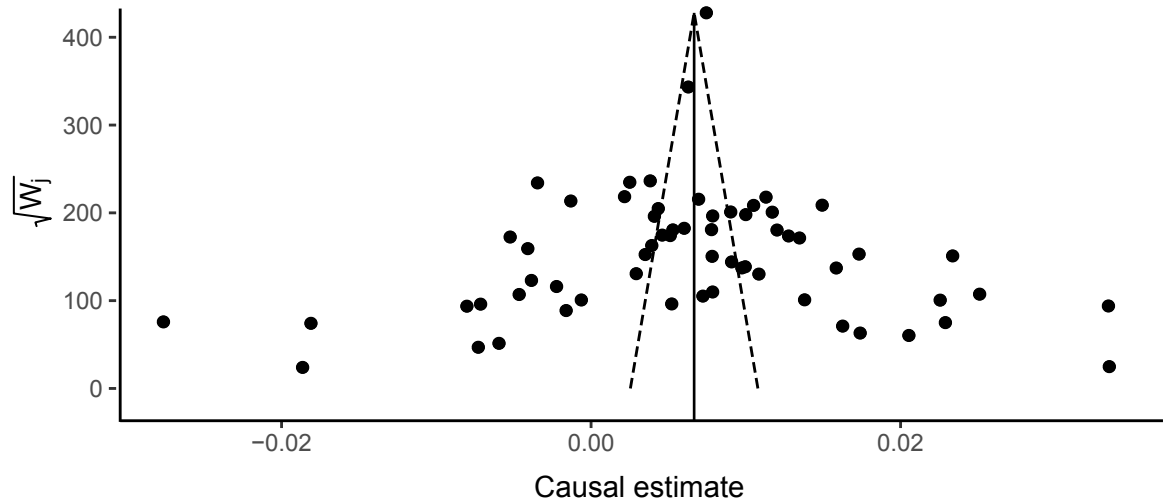

Supplement: MOESM1 [file 25664274]
