# Supplementary material for: Causal relationships between genetically determined metabolites and human intelligence: a Mendelian randomization study
Source: Springer Nature journal article supplement (doi:10.1186/s13041-021-00743-4), 2021-02-09

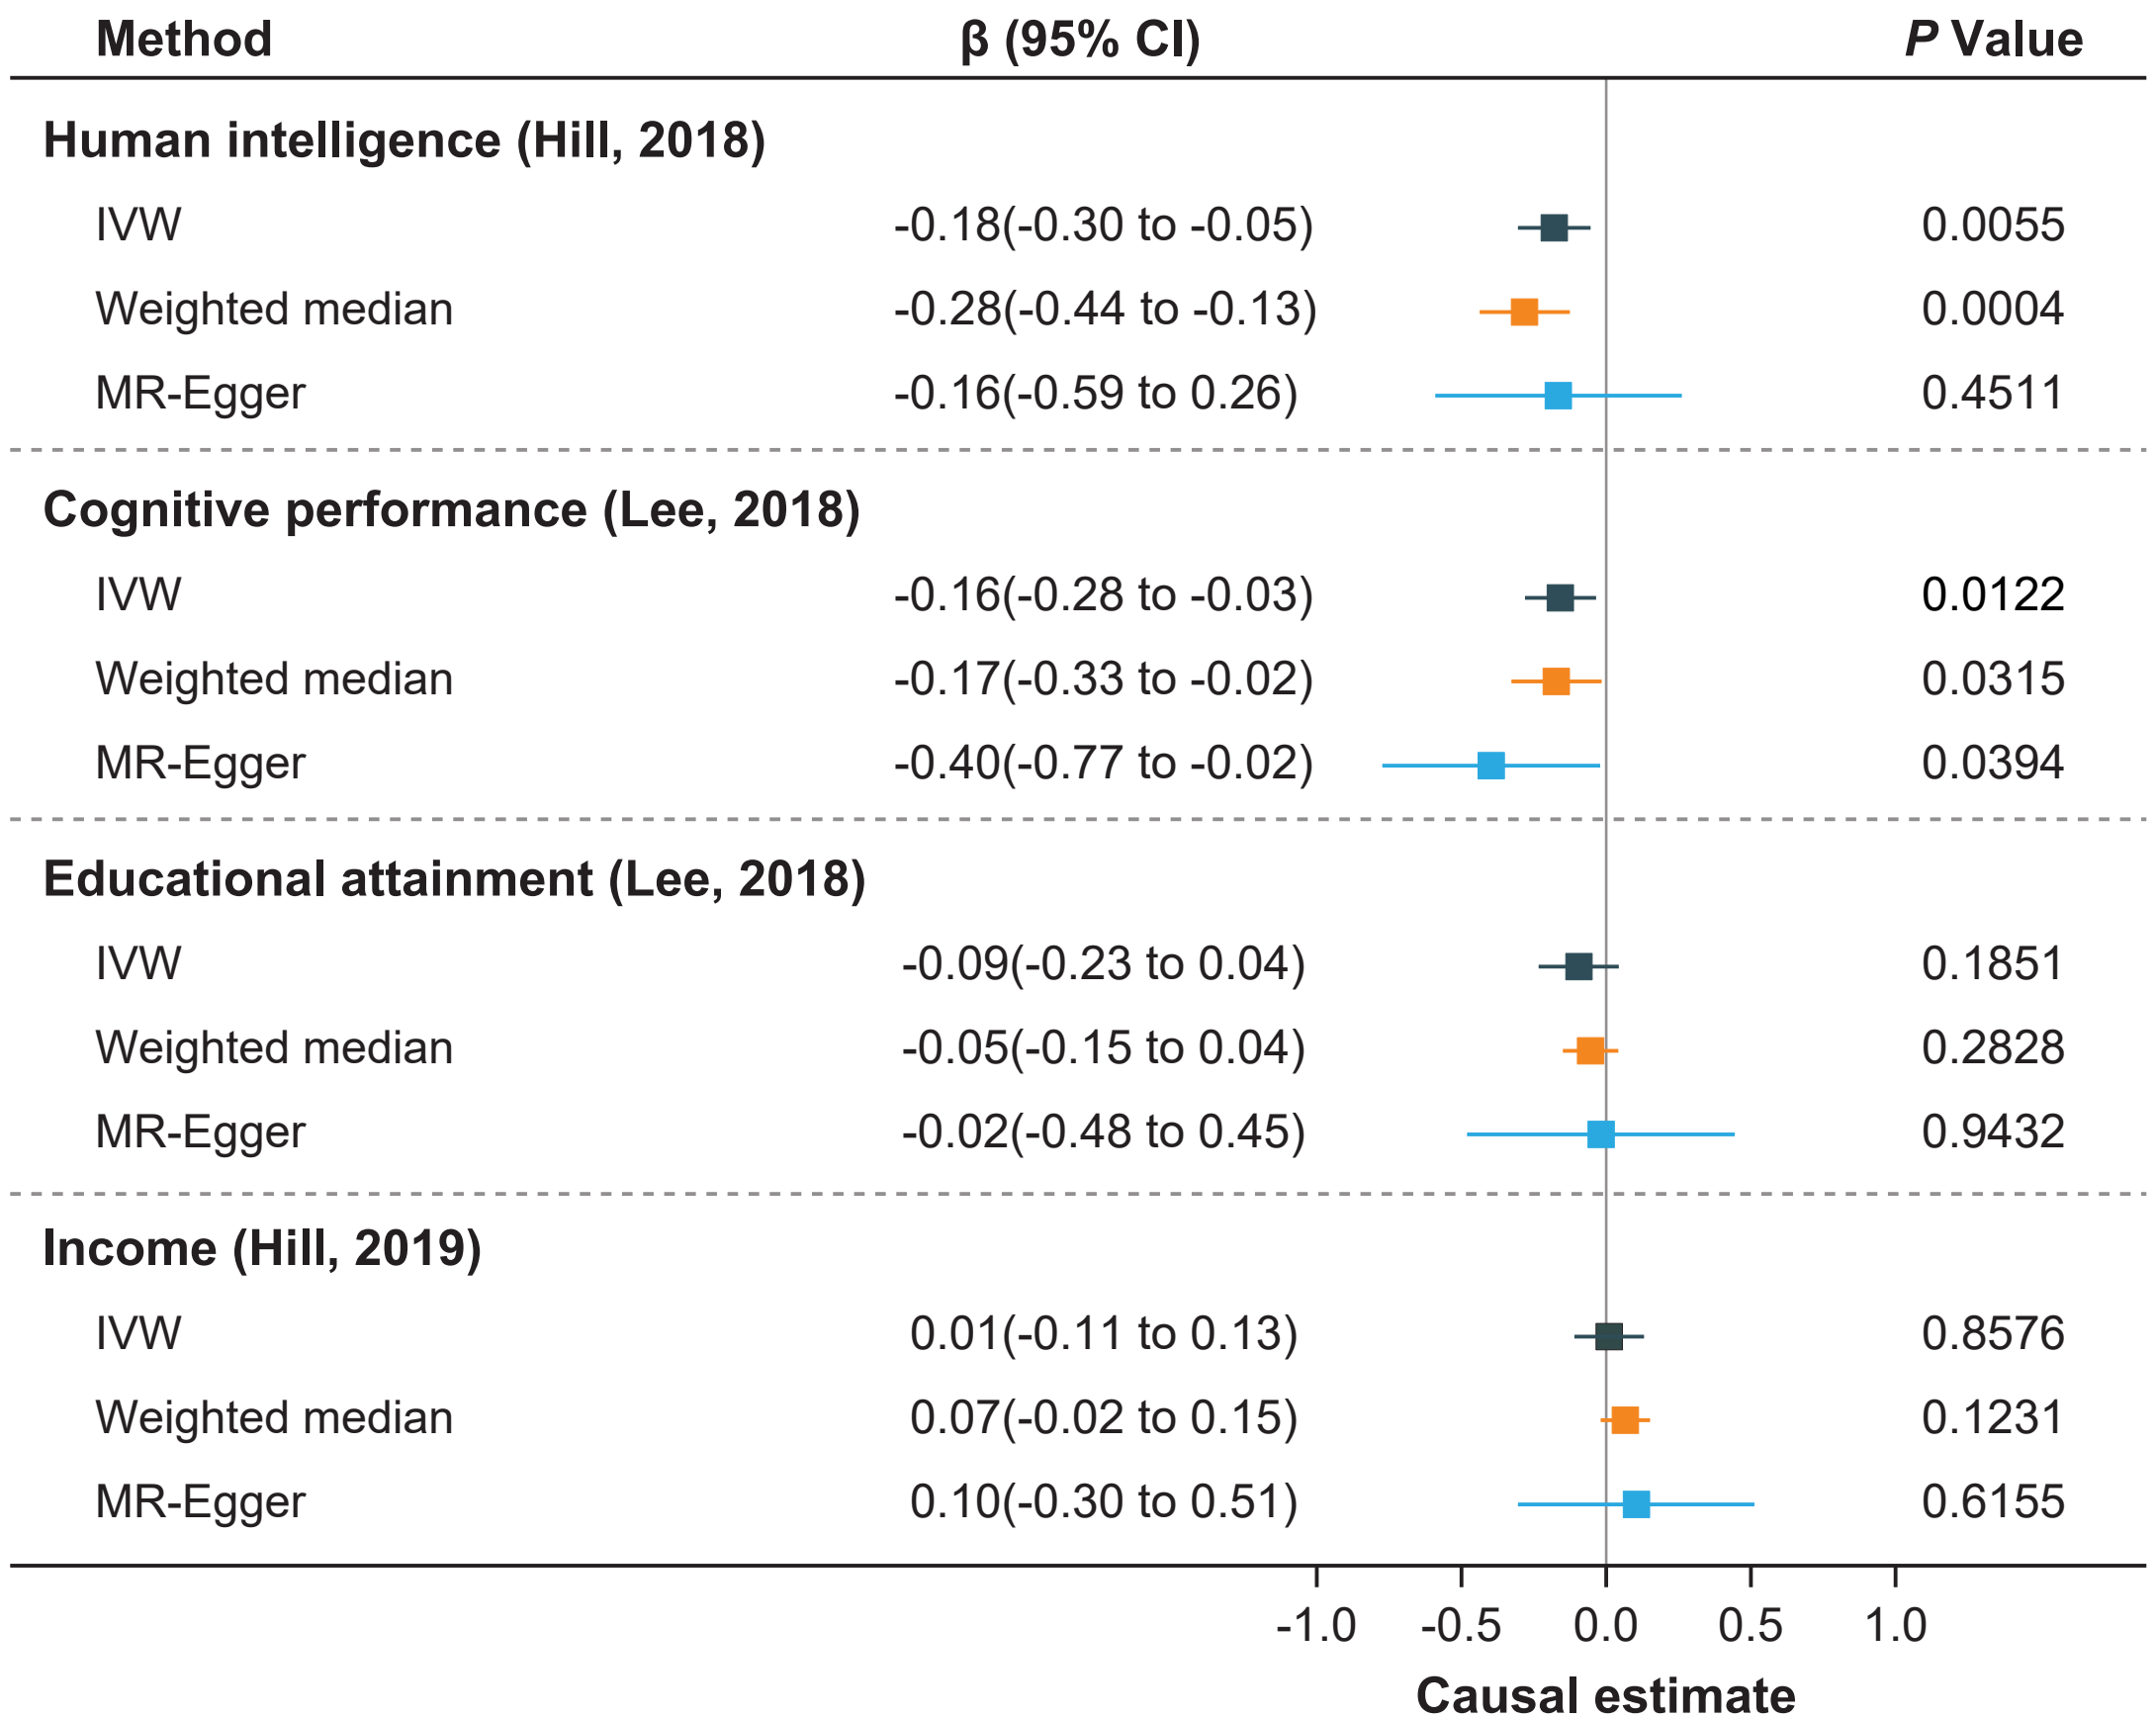

Supplement: MOESM2 [file 25664274]
