# Supplementary material for: Causal relationships between genetically determined metabolites and human intelligence: a Mendelian randomization study
Source: Mol Brain. 2021 Feb 9;14:29. doi: 10.1186/s13041-021-00743-4 (PMC7871559; doi:10.1186/s13041-021-00743-4)
Supplement: Supplementary file 4 — Additional file 4: Table S1. Information of the instrumental variables used for Mendelian randomization estimates. Table S2. Unknown metabolites identified by the Mendelian randomization estimates. Table S3. Genetic predictors for dihomo-linoleate (20:2n6) and their association with Intelligence. Table S4. Genetic predictors for p-acetamidophenylglucuronide and their association with Intelligence. [file 13041_2021_743_MOESM4_ESM.xlsx]

## Sheet: Supplementary Table 1
Supplementary Table 1 Information of the instrumental variables used for Mendelian randomization estimates
Metabolite	SNP	E_A	R_A	EAF	Beta	SE	P
Glutamine Number of SNPs: 8 Variation explained (R2): 2.4% F statistic: 24.46	rs7313455	A	C	0.4395	0.0062	0.0011	2.051e-08
Glutamine_ K = 8_ R2 = 2.4% _F = 24.46	rs2911711	A	T	0.5497	0.0051	0.0011	4.967e-06
Glutamine_ K = 8_ R2 = 2.4% _F = 24.46	rs1363748	A	G	0.6984	-0.0051	0.0012	9.836e-06
Glutamine_ K = 8_ R2 = 2.4% _F = 24.46	rs2748991	T	C	0.446	-0.007	0.0015	2.342e-06
Glutamine_ K = 8_ R2 = 2.4% _F = 24.46	rs7304944	T	C	0.1271	-0.0131	0.0021	3.478e-10
Glutamine_ K = 8_ R2 = 2.4% _F = 24.46	rs11684628	A	G	0.2741	0.0052	0.0012	8.303e-06
Glutamine_ K = 8_ R2 = 2.4% _F = 24.46	rs7068278	T	G	0.1934	0.0083	0.0018	3.038e-06
Glutamine_ K = 8_ R2 = 2.4% _F = 24.46	rs7394051	T	C	0.7014	0.0055	0.0012	2.175e-06
Glutamine_ K = 8_ R2 = 2.4% _F = 24.46	rs11596604	A	G	0.0236	0.0323	0.0069	2.515e-06
Tryptophan Number of SNPs: 187 Variation explained (R2): 42.2% F statistic: 29.86	rs7594598	A	C	0.4257	0.004	0.0009	9.497e-06
Tryptophan_ K = 187_ R2 = 42.2% _F = 29.86	rs635548	T	C	0.5161	-0.0044	0.0009	7.784e-07
Tryptophan_ K = 187_ R2 = 42.2% _F = 29.86	rs16836288	A	C	0.044	0.0131	0.0029	5.601e-06
Tryptophan_ K = 187_ R2 = 42.2% _F = 29.86	rs17114354	A	G	0.9874	0.0248	0.0053	3.515e-06
Tryptophan_ K = 187_ R2 = 42.2% _F = 29.86	rs893922	A	G	0.366	0.0042	0.0009	3.945e-06
Tryptophan_ K = 187_ R2 = 42.2% _F = 29.86	rs6778716	A	G	0.6336	-0.0041	0.0009	5.242e-06
Tryptophan_ K = 187_ R2 = 42.2% _F = 29.86	rs11605459	C	G	0.5787	-0.0041	0.0009	5.902e-06
Tryptophan_ K = 187_ R2 = 42.2% _F = 29.86	rs6537156	T	C	0.4485	0.004	0.0009	8.091e-06
Tryptophan_ K = 187_ R2 = 42.2% _F = 29.86	rs1995960	A	G	0.5949	-0.0047	0.0009	1.629e-07
Tryptophan_ K = 187_ R2 = 42.2% _F = 29.86	rs7246393	A	G	0.5222	0.0043	0.0009	1.554e-06
Tryptophan_ K = 187_ R2 = 42.2% _F = 29.86	rs284191	A	G	0.615	-0.006	0.001	1.973e-09
Tryptophan_ K = 187_ R2 = 42.2% _F = 29.86	rs12497219	T	C	0.5545	-0.0045	0.0009	5.326e-07
Tryptophan_ K = 187_ R2 = 42.2% _F = 29.86	rs12891553	T	C	0.522	-0.0043	0.0009	2.351e-06
Tryptophan_ K = 187_ R2 = 42.2% _F = 29.86	rs664059	T	C	0.5182	0.0043	0.0009	1.433e-06
Tryptophan_ K = 187_ R2 = 42.2% _F = 29.86	rs1997238	A	G	0.5117	0.0045	0.0009	6.07e-07
Tryptophan_ K = 187_ R2 = 42.2% _F = 29.86	rs4751282	T	C	0.5421	0.0045	0.0009	7.405e-07
Tryptophan_ K = 187_ R2 = 42.2% _F = 29.86	rs9610322	A	G	0.5195	-0.0043	0.0009	1.119e-06
Tryptophan_ K = 187_ R2 = 42.2% _F = 29.86	rs10836364	T	C	0.607	0.005	0.001	5.733e-07
Tryptophan_ K = 187_ R2 = 42.2% _F = 29.86	rs1501803	T	C	0.4152	0.0042	0.0009	4.567e-06
Tryptophan_ K = 187_ R2 = 42.2% _F = 29.86	rs10927101	A	C	0.3738	-0.0046	0.0009	2.721e-07
Tryptophan_ K = 187_ R2 = 42.2% _F = 29.86	rs17698249	A	C	0.5682	-0.0041	0.0009	5.503e-06
Tryptophan_ K = 187_ R2 = 42.2% _F = 29.86	rs295142	A	G	0.5909	-0.0048	0.0009	1.538e-07
Tryptophan_ K = 187_ R2 = 42.2% _F = 29.86	rs4972588	A	G	0.5138	-0.0046	0.0009	3.744e-07
Tryptophan_ K = 187_ R2 = 42.2% _F = 29.86	rs881562	T	G	0.4978	0.0044	0.0009	1.451e-06
Tryptophan_ K = 187_ R2 = 42.2% _F = 29.86	rs1887646	A	G	0.5277	0.004	0.0009	6.752e-06
Tryptophan_ K = 187_ R2 = 42.2% _F = 29.86	rs1330918	A	C	0.6132	0.0042	0.0009	2.212e-06
Tryptophan_ K = 187_ R2 = 42.2% _F = 29.86	rs8006663	A	G	0.4556	-0.0046	0.0009	3.016e-07
Tryptophan_ K = 187_ R2 = 42.2% _F = 29.86	rs6730726	A	G	0.5312	-0.004	0.0009	7.167e-06
Tryptophan_ K = 187_ R2 = 42.2% _F = 29.86	rs11201034	A	T	0.6064	0.0043	0.0009	1.888e-06
Tryptophan_ K = 187_ R2 = 42.2% _F = 29.86	rs6824174	T	C	0.4845	-0.0041	0.0009	5.365e-06
Tryptophan_ K = 187_ R2 = 42.2% _F = 29.86	rs1663501	A	G	0.4634	-0.0047	0.0009	2.435e-07
Tryptophan_ K = 187_ R2 = 42.2% _F = 29.86	rs207942	C	G	0.3921	-0.0043	0.0009	1.954e-06
Tryptophan_ K = 187_ R2 = 42.2% _F = 29.86	rs4880888	A	G	0.4785	-0.0046	0.0009	3.243e-07
Tryptophan_ K = 187_ R2 = 42.2% _F = 29.86	rs1345390	T	C	0.3838	-0.005	0.0009	1.956e-08
Tryptophan_ K = 187_ R2 = 42.2% _F = 29.86	rs12278762	T	C	0.5229	0.0043	0.0009	1.557e-06
Tryptophan_ K = 187_ R2 = 42.2% _F = 29.86	rs1015993	T	C	0.4684	0.0041	0.0009	7.309e-06
Tryptophan_ K = 187_ R2 = 42.2% _F = 29.86	rs4611118	A	G	0.609	-0.0044	0.0009	9.406e-07
Tryptophan_ K = 187_ R2 = 42.2% _F = 29.86	rs7476743	T	C	0.5738	-0.0046	0.0009	2.393e-07
Tryptophan_ K = 187_ R2 = 42.2% _F = 29.86	rs7717884	T	G	0.5836	0.0045	0.0009	5.572e-07
Tryptophan_ K = 187_ R2 = 42.2% _F = 29.86	rs4702007	A	G	0.3929	-0.0041	0.0009	6.109e-06
Tryptophan_ K = 187_ R2 = 42.2% _F = 29.86	rs6685230	T	C	0.3976	-0.0042	0.0009	7.78e-06
Tryptophan_ K = 187_ R2 = 42.2% _F = 29.86	rs3927971	T	C	0.5178	0.0042	0.0009	8.977e-06
Tryptophan_ K = 187_ R2 = 42.2% _F = 29.86	rs10846667	T	C	0.4861	0.0045	0.0009	1.651e-06
Tryptophan_ K = 187_ R2 = 42.2% _F = 29.86	rs2688858	T	C	0.5742	0.0043	0.0009	2.837e-06
Tryptophan_ K = 187_ R2 = 42.2% _F = 29.86	rs8088963	A	G	0.6387	0.0044	0.0009	8.287e-07
Tryptophan_ K = 187_ R2 = 42.2% _F = 29.86	rs1508513	C	G	0.6354	0.0042	0.0009	2.363e-06
Tryptophan_ K = 187_ R2 = 42.2% _F = 29.86	rs428185	T	C	0.5851	-0.0045	0.0009	6.254e-07
Tryptophan_ K = 187_ R2 = 42.2% _F = 29.86	rs938040	T	C	0.107	0.0074	0.0017	9.124e-06
Tryptophan_ K = 187_ R2 = 42.2% _F = 29.86	rs7584842	T	C	0.5377	-0.005	0.0009	4.15e-08
Tryptophan_ K = 187_ R2 = 42.2% _F = 29.86	rs2813760	A	G	0.5775	0.0044	0.0009	1.187e-06
Tryptophan_ K = 187_ R2 = 42.2% _F = 29.86	rs9948912	A	G	0.3616	0.004	0.0009	9.579e-06
Tryptophan_ K = 187_ R2 = 42.2% _F = 29.86	rs11659379	T	C	0.5042	0.004	0.0009	8.538e-06
Tryptophan_ K = 187_ R2 = 42.2% _F = 29.86	rs7156205	A	G	0.5144	-0.0044	0.0009	1.011e-06
Tryptophan_ K = 187_ R2 = 42.2% _F = 29.86	rs2221440	A	G	0.4032	-0.0041	0.0009	6.003e-06
Tryptophan_ K = 187_ R2 = 42.2% _F = 29.86	rs1549225	T	C	0.607	0.0045	0.0009	6.057e-07
Tryptophan_ K = 187_ R2 = 42.2% _F = 29.86	rs6454864	T	C	0.3705	0.004	0.0009	8.872e-06
Tryptophan_ K = 187_ R2 = 42.2% _F = 29.86	rs10764489	A	G	0.532	0.0044	0.0009	9.788e-07
Tryptophan_ K = 187_ R2 = 42.2% _F = 29.86	rs10495209	T	C	0.4862	0.004	0.0009	8.02e-06
Tryptophan_ K = 187_ R2 = 42.2% _F = 29.86	rs826056	T	C	0.4773	-0.0048	0.0009	5.793e-08
Tryptophan_ K = 187_ R2 = 42.2% _F = 29.86	rs33980	C	G	0.9071	-0.0077	0.0017	9.108e-06
Tryptophan_ K = 187_ R2 = 42.2% _F = 29.86	rs3828151	A	C	0.4111	-0.0042	0.0009	4.073e-06
Tryptophan_ K = 187_ R2 = 42.2% _F = 29.86	rs12490596	A	G	0.5786	-0.004	0.0009	8.679e-06
Tryptophan_ K = 187_ R2 = 42.2% _F = 29.86	rs950880	A	C	0.3822	-0.004	0.0009	7.886e-06
Tryptophan_ K = 187_ R2 = 42.2% _F = 29.86	rs10805503	T	C	0.6272	0.0043	0.0009	1.996e-06
Tryptophan_ K = 187_ R2 = 42.2% _F = 29.86	rs161551	T	C	0.3954	0.0042	0.0009	2.687e-06
Tryptophan_ K = 187_ R2 = 42.2% _F = 29.86	rs2520117	A	G	0.4545	0.0045	0.0009	5.056e-07
Tryptophan_ K = 187_ R2 = 42.2% _F = 29.86	rs6001129	T	C	0.134	-0.009	0.002	6.795e-06
Tryptophan_ K = 187_ R2 = 42.2% _F = 29.86	rs6910731	A	G	0.4497	0.0041	0.0009	6.679e-06
Tryptophan_ K = 187_ R2 = 42.2% _F = 29.86	rs1220605	A	G	0.6312	-0.0046	0.0009	9.291e-07
Tryptophan_ K = 187_ R2 = 42.2% _F = 29.86	rs10931041	T	C	0.5756	-0.0042	0.0009	3.362e-06
Tryptophan_ K = 187_ R2 = 42.2% _F = 29.86	rs11804149	T	C	0.4678	0.0041	0.0009	4.612e-06
Tryptophan_ K = 187_ R2 = 42.2% _F = 29.86	rs6826247	T	C	0.5071	0.0048	0.0009	8.797e-08
Tryptophan_ K = 187_ R2 = 42.2% _F = 29.86	rs4755291	A	G	0.4644	-0.0041	0.0009	5.253e-06
Tryptophan_ K = 187_ R2 = 42.2% _F = 29.86	rs502654	T	C	0.559	-0.0046	0.0009	2.597e-07
Tryptophan_ K = 187_ R2 = 42.2% _F = 29.86	rs2050695	T	C	0.5282	-0.004	0.0009	9.856e-06
Tryptophan_ K = 187_ R2 = 42.2% _F = 29.86	rs10822056	T	C	0.5141	0.0042	0.0009	2.651e-06
Tryptophan_ K = 187_ R2 = 42.2% _F = 29.86	rs11729831	T	G	0.6133	0.004	0.0009	8.61e-06
Tryptophan_ K = 187_ R2 = 42.2% _F = 29.86	rs3846758	A	T	0.4581	0.004	0.0009	8.699e-06
Tryptophan_ K = 187_ R2 = 42.2% _F = 29.86	rs1519309	T	C	0.6544	-0.0044	0.0009	1.206e-06
Tryptophan_ K = 187_ R2 = 42.2% _F = 29.86	rs6130271	T	C	0.5352	-0.004	0.0009	7.398e-06
Tryptophan_ K = 187_ R2 = 42.2% _F = 29.86	rs1179636	A	C	0.5356	-0.0045	0.001	1.825e-06
Tryptophan_ K = 187_ R2 = 42.2% _F = 29.86	rs6586235	A	C	0.4598	0.0043	0.0009	1.622e-06
Tryptophan_ K = 187_ R2 = 42.2% _F = 29.86	rs958635	A	G	0.4705	0.0045	0.0009	4.59e-07
Tryptophan_ K = 187_ R2 = 42.2% _F = 29.86	rs2798184	T	C	0.4314	-0.0049	0.0009	6.371e-08
Tryptophan_ K = 187_ R2 = 42.2% _F = 29.86	rs10041520	T	C	0.5307	-0.004	0.0009	7.491e-06
Tryptophan_ K = 187_ R2 = 42.2% _F = 29.86	rs2713243	A	C	0.3763	-0.0044	0.0009	8.563e-07
Tryptophan_ K = 187_ R2 = 42.2% _F = 29.86	rs6747650	A	G	0.5825	-0.0041	0.0009	4.362e-06
Tryptophan_ K = 187_ R2 = 42.2% _F = 29.86	rs9878578	A	G	0.6016	0.0041	0.0009	5.323e-06
Tryptophan_ K = 187_ R2 = 42.2% _F = 29.86	rs2658761	T	C	0.4343	-0.0048	0.0009	6.749e-08
Tryptophan_ K = 187_ R2 = 42.2% _F = 29.86	rs4539321	A	C	0.5503	0.0044	0.0009	1.141e-06
Tryptophan_ K = 187_ R2 = 42.2% _F = 29.86	rs736929	T	C	0.5915	-0.0043	0.0009	1.25e-06
Tryptophan_ K = 187_ R2 = 42.2% _F = 29.86	rs8094588	T	C	0.6202	-0.0042	0.0009	2.948e-06
Tryptophan_ K = 187_ R2 = 42.2% _F = 29.86	rs710580	A	C	0.3566	-0.005	0.0009	3.574e-08
Tryptophan_ K = 187_ R2 = 42.2% _F = 29.86	rs7748625	A	G	0.6177	-0.0041	0.0009	4.786e-06
Tryptophan_ K = 187_ R2 = 42.2% _F = 29.86	rs10784496	A	G	0.5375	0.0045	0.0009	5.085e-07
Tryptophan_ K = 187_ R2 = 42.2% _F = 29.86	rs6947698	C	G	0.4558	-0.004	0.0009	8.341e-06
Tryptophan_ K = 187_ R2 = 42.2% _F = 29.86	rs2901056	C	G	0.5215	-0.004	0.0009	6.542e-06
Tryptophan_ K = 187_ R2 = 42.2% _F = 29.86	rs4973952	C	G	0.415	-0.0041	0.0009	6.47e-06
Tryptophan_ K = 187_ R2 = 42.2% _F = 29.86	rs4571059	T	C	0.6079	0.004	0.0009	8.501e-06
Tryptophan_ K = 187_ R2 = 42.2% _F = 29.86	rs11678851	T	C	0.4138	0.0041	0.0009	5.943e-06
Tryptophan_ K = 187_ R2 = 42.2% _F = 29.86	rs1683253	T	C	0.5188	-0.0042	0.0009	3.129e-06
Tryptophan_ K = 187_ R2 = 42.2% _F = 29.86	rs4346442	A	T	0.4816	0.0043	0.0009	1.667e-06
Tryptophan_ K = 187_ R2 = 42.2% _F = 29.86	rs7006068	T	C	0.6264	0.0045	0.0009	4.801e-07
Tryptophan_ K = 187_ R2 = 42.2% _F = 29.86	rs9523030	T	G	0.6269	0.0043	0.0009	5.647e-06
Tryptophan_ K = 187_ R2 = 42.2% _F = 29.86	rs201262	T	G	0.5563	0.0047	0.0009	1.359e-07
Tryptophan_ K = 187_ R2 = 42.2% _F = 29.86	rs2927324	T	C	0.5432	-0.0042	0.0009	2.911e-06
Tryptophan_ K = 187_ R2 = 42.2% _F = 29.86	rs3133944	T	C	0.4495	0.0046	0.0009	4.463e-07
Tryptophan_ K = 187_ R2 = 42.2% _F = 29.86	rs1013667	A	G	0.6087	-0.0041	0.0009	5.673e-06
Tryptophan_ K = 187_ R2 = 42.2% _F = 29.86	rs9842801	C	G	0.5128	0.0044	0.0009	7.912e-07
Tryptophan_ K = 187_ R2 = 42.2% _F = 29.86	rs699856	T	C	0.3661	0.004	0.0009	8.012e-06
Tryptophan_ K = 187_ R2 = 42.2% _F = 29.86	rs6759991	T	G	0.8623	0.0076	0.0016	2.521e-06
Tryptophan_ K = 187_ R2 = 42.2% _F = 29.86	rs13392809	T	C	0.4702	0.0043	0.0009	1.547e-06
Tryptophan_ K = 187_ R2 = 42.2% _F = 29.86	rs2303972	A	T	0.4403	0.0041	0.0009	4.821e-06
Tryptophan_ K = 187_ R2 = 42.2% _F = 29.86	rs2722407	A	G	0.587	0.0041	0.0009	6.472e-06
Tryptophan_ K = 187_ R2 = 42.2% _F = 29.86	rs2383131	T	C	0.4403	-0.0043	0.0009	3.054e-06
Tryptophan_ K = 187_ R2 = 42.2% _F = 29.86	rs7230740	A	C	0.6655	0.0044	0.0009	1.559e-06
Tryptophan_ K = 187_ R2 = 42.2% _F = 29.86	rs1852138	A	G	0.5761	0.004	0.0009	6.335e-06
Tryptophan_ K = 187_ R2 = 42.2% _F = 29.86	rs1022092	A	G	0.5544	-0.0049	0.0009	6.529e-08
Tryptophan_ K = 187_ R2 = 42.2% _F = 29.86	rs1927011	A	C	0.4904	-0.0041	0.0009	4.112e-06
Tryptophan_ K = 187_ R2 = 42.2% _F = 29.86	rs3780494	T	C	0.9855	-0.023	0.0051	7.022e-06
Tryptophan_ K = 187_ R2 = 42.2% _F = 29.86	rs4695289	A	G	0.3489	-0.0045	0.0009	7.948e-07
Tryptophan_ K = 187_ R2 = 42.2% _F = 29.86	rs4615256	A	G	0.5327	0.0049	0.0009	4.988e-08
Tryptophan_ K = 187_ R2 = 42.2% _F = 29.86	rs937382	T	C	0.4466	-0.0046	0.0009	2.312e-07
Tryptophan_ K = 187_ R2 = 42.2% _F = 29.86	rs1249489	A	G	0.3741	0.0042	0.0009	3.683e-06
Tryptophan_ K = 187_ R2 = 42.2% _F = 29.86	rs1864235	C	G	0.5534	0.0041	0.0009	6.673e-06
Tryptophan_ K = 187_ R2 = 42.2% _F = 29.86	rs2261659	C	G	0.44	-0.0043	0.0009	1.63e-06
Tryptophan_ K = 187_ R2 = 42.2% _F = 29.86	rs2178779	A	G	0.4943	-0.004	0.0009	9.976e-06
Tryptophan_ K = 187_ R2 = 42.2% _F = 29.86	rs10007704	T	C	0.6418	-0.0044	0.0009	1.238e-06
Tryptophan_ K = 187_ R2 = 42.2% _F = 29.86	rs7198470	T	C	0.6081	0.004	0.0009	9.003e-06
Tryptophan_ K = 187_ R2 = 42.2% _F = 29.86	rs1638362	T	C	0.4947	-0.0046	0.0009	2.892e-07
Tryptophan_ K = 187_ R2 = 42.2% _F = 29.86	rs341973	T	C	0.493	0.005	0.001	5.733e-07
Tryptophan_ K = 187_ R2 = 42.2% _F = 29.86	rs10171387	A	G	0.9051	0.008	0.0018	5.141e-06
Tryptophan_ K = 187_ R2 = 42.2% _F = 29.86	rs8045774	T	C	0.6281	-0.004	0.0009	8.087e-06
Tryptophan_ K = 187_ R2 = 42.2% _F = 29.86	rs2585160	A	G	0.3986	0.004	0.0009	7.157e-06
Tryptophan_ K = 187_ R2 = 42.2% _F = 29.86	rs1443347	A	G	0.4509	0.0042	0.0009	2.647e-06
Tryptophan_ K = 187_ R2 = 42.2% _F = 29.86	rs2271537	A	C	0.4662	-0.0061	0.0009	1.879e-11
Tryptophan_ K = 187_ R2 = 42.2% _F = 29.86	rs6534667	C	G	0.4186	-0.0043	0.0009	1.491e-06
Tryptophan_ K = 187_ R2 = 42.2% _F = 29.86	rs8110890	T	G	0.4741	0.0045	0.0009	7.505e-07
Tryptophan_ K = 187_ R2 = 42.2% _F = 29.86	rs1349704	A	G	0.4611	0.0044	0.0009	8.312e-07
Tryptophan_ K = 187_ R2 = 42.2% _F = 29.86	rs2868072	A	G	0.4829	0.004	0.0009	9.036e-06
Tryptophan_ K = 187_ R2 = 42.2% _F = 29.86	rs11937375	C	G	0.68	-0.018	0.004	6.795e-06
Tryptophan_ K = 187_ R2 = 42.2% _F = 29.86	rs12497223	T	C	0.5345	0.0042	0.0009	2.257e-06
Tryptophan_ K = 187_ R2 = 42.2% _F = 29.86	rs7009696	T	C	0.6243	0.0041	0.0009	6.166e-06
Tryptophan_ K = 187_ R2 = 42.2% _F = 29.86	rs9517869	T	C	0.3661	-0.0046	0.0009	3.457e-07
Tryptophan_ K = 187_ R2 = 42.2% _F = 29.86	rs4447501	A	T	0.484	0.0042	0.0009	4.125e-06
Tryptophan_ K = 187_ R2 = 42.2% _F = 29.86	rs2834165	A	G	0.5041	-0.0045	0.0009	4.862e-07
Tryptophan_ K = 187_ R2 = 42.2% _F = 29.86	rs6437242	A	T	0.4336	-0.0043	0.0009	1.38e-06
Tryptophan_ K = 187_ R2 = 42.2% _F = 29.86	rs6077611	T	G	0.4794	-0.0041	0.0009	5.321e-06
Tryptophan_ K = 187_ R2 = 42.2% _F = 29.86	rs10073440	A	G	0.5146	0.0043	0.0009	1.439e-06
Tryptophan_ K = 187_ R2 = 42.2% _F = 29.86	rs875283	A	G	0.4896	-0.0043	0.0009	2.341e-06
Tryptophan_ K = 187_ R2 = 42.2% _F = 29.86	rs10225863	T	C	0.3949	-0.004	0.0009	9.754e-06
Tryptophan_ K = 187_ R2 = 42.2% _F = 29.86	rs4407399	T	C	0.603	-0.005	0.001	5.733e-07
Tryptophan_ K = 187_ R2 = 42.2% _F = 29.86	rs1000137	T	C	0.475	-0.005	0.001	5.733e-07
Tryptophan_ K = 187_ R2 = 42.2% _F = 29.86	rs3799739	T	C	0.4666	0.0052	0.0009	6.198e-09
Tryptophan_ K = 187_ R2 = 42.2% _F = 29.86	rs9541214	T	C	0.653	-0.0042	0.0009	3.797e-06
Tryptophan_ K = 187_ R2 = 42.2% _F = 29.86	rs17034862	C	G	0.5175	-0.004	0.0009	6.917e-06
Tryptophan_ K = 187_ R2 = 42.2% _F = 29.86	rs6110544	T	C	0.4394	0.004	0.0009	7.011e-06
Tryptophan_ K = 187_ R2 = 42.2% _F = 29.86	rs2484178	T	C	0.6063	0.0043	0.0009	1.745e-06
Tryptophan_ K = 187_ R2 = 42.2% _F = 29.86	rs9330454	A	G	0.4006	-0.0066	0.0015	6.044e-06
Tryptophan_ K = 187_ R2 = 42.2% _F = 29.86	rs10750415	T	G	0.3959	0.0042	0.0009	2.767e-06
Tryptophan_ K = 187_ R2 = 42.2% _F = 29.86	rs10881004	T	C	0.4824	0.0041	0.0009	3.392e-06
Tryptophan_ K = 187_ R2 = 42.2% _F = 29.86	rs11654913	A	T	0.5579	-0.004	0.0009	6.912e-06
Tryptophan_ K = 187_ R2 = 42.2% _F = 29.86	rs9547650	T	C	0.5819	0.004	0.0009	9.107e-06
Tryptophan_ K = 187_ R2 = 42.2% _F = 29.86	rs10807322	A	T	0.5866	0.0043	0.0009	1.974e-06
Tryptophan_ K = 187_ R2 = 42.2% _F = 29.86	rs10920675	A	G	0.4948	-0.0092	0.002	5.316e-06
Tryptophan_ K = 187_ R2 = 42.2% _F = 29.86	rs5997110	T	C	0.523	-0.005	0.001	5.733e-07
Tryptophan_ K = 187_ R2 = 42.2% _F = 29.86	rs4870304	A	G	0.5823	0.0041	0.0009	8.313e-06
Tryptophan_ K = 187_ R2 = 42.2% _F = 29.86	rs713246	C	G	0.5592	0.0041	0.0009	4.452e-06
Tryptophan_ K = 187_ R2 = 42.2% _F = 29.86	rs12618875	C	G	0.3961	-0.0041	0.0009	3.761e-06
Tryptophan_ K = 187_ R2 = 42.2% _F = 29.86	rs575257	A	G	0.6005	-0.0042	0.0009	3.511e-06
Tryptophan_ K = 187_ R2 = 42.2% _F = 29.86	rs2510595	A	G	0.6113	-0.0045	0.0009	4.989e-07
Tryptophan_ K = 187_ R2 = 42.2% _F = 29.86	rs3818337	T	G	0.5669	0.0041	0.0009	6.565e-06
Tryptophan_ K = 187_ R2 = 42.2% _F = 29.86	rs756568	C	G	0.4033	-0.004	0.0009	9.097e-06
Tryptophan_ K = 187_ R2 = 42.2% _F = 29.86	rs3772343	A	C	0.987	0.028	0.006	3.061e-06
Tryptophan_ K = 187_ R2 = 42.2% _F = 29.86	rs16823952	T	G	0.9069	-0.0083	0.0018	5.079e-06
Tryptophan_ K = 187_ R2 = 42.2% _F = 29.86	rs17744500	T	C	0.4582	-0.0041	0.0009	4.157e-06
Tryptophan_ K = 187_ R2 = 42.2% _F = 29.86	rs928963	A	C	0.3985	0.0042	0.0009	3.622e-06
Tryptophan_ K = 187_ R2 = 42.2% _F = 29.86	rs3751181	A	G	0.6085	0.0041	0.0009	5.185e-06
Tryptophan_ K = 187_ R2 = 42.2% _F = 29.86	rs10900784	A	C	0.4158	-0.0044	0.0009	9.744e-07
Tryptophan_ K = 187_ R2 = 42.2% _F = 29.86	rs6819555	A	G	0.5862	-0.0043	0.0009	3.693e-06
Tryptophan_ K = 187_ R2 = 42.2% _F = 29.86	rs12533939	A	T	0.3887	0.0045	0.0009	6.516e-07
Tryptophan_ K = 187_ R2 = 42.2% _F = 29.86	rs915281	T	C	0.5076	-0.0041	0.0009	4.423e-06
Tryptophan_ K = 187_ R2 = 42.2% _F = 29.86	rs42162	T	C	0.5492	0.004	0.0009	8.217e-06
Tryptophan_ K = 187_ R2 = 42.2% _F = 29.86	rs3819041	C	G	0.5828	-0.0041	0.0009	5.664e-06
Tryptophan_ K = 187_ R2 = 42.2% _F = 29.86	rs1418942	A	C	0.5751	-0.004	0.0009	7.128e-06
Tryptophan_ K = 187_ R2 = 42.2% _F = 29.86	rs9950125	A	G	0.4521	-0.004	0.0009	7.715e-06
Tryptophan_ K = 187_ R2 = 42.2% _F = 29.86	rs11802417	T	C	0.5816	-0.0041	0.0009	4.469e-06
Tryptophan_ K = 187_ R2 = 42.2% _F = 29.86	rs6435723	T	C	0.8977	-0.008	0.0018	6.907e-06
Tryptophan_ K = 187_ R2 = 42.2% _F = 29.86	rs7638383	A	G	0.3984	0.0047	0.0009	1.641e-07
Tryptophan_ K = 187_ R2 = 42.2% _F = 29.86	rs2592037	T	G	0.6124	-0.004	0.0009	9.395e-06
Tryptophan_ K = 187_ R2 = 42.2% _F = 29.86	rs3754932	T	C	0.4966	-0.004	0.0009	9.276e-06
Tryptophan_ K = 187_ R2 = 42.2% _F = 29.86	rs4989308	A	G	0.3746	-0.0045	0.0009	8.432e-07
Tryptophan_ K = 187_ R2 = 42.2% _F = 29.86	rs4144737	A	G	0.5818	0.004	0.0009	9.859e-06
Tryptophan_ K = 187_ R2 = 42.2% _F = 29.86	rs3773729	T	C	0.6291	0.004	0.0009	8.571e-06
Tryptophan_ K = 187_ R2 = 42.2% _F = 29.86	rs12708881	A	G	0.5063	0.0043	0.0009	2.367e-06
Tryptophan_ K = 187_ R2 = 42.2% _F = 29.86	rs4958379	A	G	0.433	-0.005	0.0009	2.176e-08
Tryptophan_ K = 187_ R2 = 42.2% _F = 29.86	rs9649963	T	C	0.634	0.0041	0.0009	5.841e-06
Tryptophan_ K = 187_ R2 = 42.2% _F = 29.86	rs7505177	T	G	0.4132	-0.0043	0.0009	5.859e-06
Tryptophan_ K = 187_ R2 = 42.2% _F = 29.86	rs11719675	A	T	0.3965	-0.0041	0.0009	5.116e-06
Tryptophan_ K = 187_ R2 = 42.2% _F = 29.86	rs430727	T	C	0.4628	0.0041	0.0009	5.128e-06
Tryptophan_ K = 187_ R2 = 42.2% _F = 29.86	rs13056963	T	C	0.4376	0.0043	0.0009	5.583e-06
Tryptophan_ K = 187_ R2 = 42.2% _F = 29.86	rs9646527	A	T	0.3795	0.004	0.0009	9.002e-06
Tryptophan_ K = 187_ R2 = 42.2% _F = 29.86	rs1260326	T	C	0.404	0.0042	0.0009	2.742e-06
Tryptophan_ K = 187_ R2 = 42.2% _F = 29.86	rs4753700	A	C	0.5481	0.0045	0.0009	9.545e-07
Tryptophan_ K = 187_ R2 = 42.2% _F = 29.86	rs7810390	A	G	0.5928	-0.0045	0.0009	5.611e-07
Tryptophan_ K = 187_ R2 = 42.2% _F = 29.86	rs38278	A	G	0.4119	0.004	0.0009	6.563e-06
Tryptophan_ K = 187_ R2 = 42.2% _F = 29.86	rs970079	A	G	0.4858	-0.0041	0.0009	4.84e-06
Tryptophan_ K = 187_ R2 = 42.2% _F = 29.86	rs2977272	T	C	0.341	0.005	0.001	5.733e-07
Tryptophan_ K = 187_ R2 = 42.2% _F = 29.86	rs7901526	A	C	0.4898	0.0042	0.0009	3.835e-06
Histidine Number of SNPs: 9 Variation explained (R2): 2.8% F statistic: 24.95	rs4768741	C	G	0.9153	-0.015	0.0032	3.524e-06
Histidine_ K = 9_ R2 = 2.8% _F = 24.95	rs2176664	T	C	0.2846	-0.0059	0.0012	2.027e-06
Histidine_ K = 9_ R2 = 2.8% _F = 24.95	rs1527683	T	C	0.8	0.0061	0.0013	2.168e-06
Histidine_ K = 9_ R2 = 2.8% _F = 24.95	rs10805346	T	C	0.5579	-0.0055	0.0012	3.26e-06
Histidine_ K = 9_ R2 = 2.8% _F = 24.95	rs12498956	A	C	0.433	0.0052	0.0012	8.897e-06
Histidine_ K = 9_ R2 = 2.8% _F = 24.95	rs10017305	T	C	0.7469	-0.0079	0.0012	2.323e-10
Histidine_ K = 9_ R2 = 2.8% _F = 24.95	rs7014133	A	G	0.0119	-0.0561	0.0109	2.739e-07
Histidine_ K = 9_ R2 = 2.8% _F = 24.95	rs4288369	C	G	0.0134	-0.0453	0.0102	9.307e-06
Histidine_ K = 9_ R2 = 2.8% _F = 24.95	rs715	T	C	0.7135	0.0059	0.0012	1.651e-06
Leucine Number of SNPs: 213 Variation explained (R2): 46% F statistic: 30.38	rs10736117	A	G	0.6265	-0.004	0.0009	8.497e-06
Leucine_ K = 213_ R2 = 46% _F = 30.38	rs1684807	T	C	0.5914	0.004	0.0009	8.179e-06
Leucine_ K = 213_ R2 = 46% _F = 30.38	rs6822279	A	C	0.3969	-0.0041	0.0009	4.788e-06
Leucine_ K = 213_ R2 = 46% _F = 30.38	rs2834741	A	T	0.4865	0.0041	0.0009	5.993e-06
Leucine_ K = 213_ R2 = 46% _F = 30.38	rs3983526	T	C	0.5244	0.004	0.0009	8.22e-06
Leucine_ K = 213_ R2 = 46% _F = 30.38	rs8003702	T	G	0.536	0.0042	0.0009	2.446e-06
Leucine_ K = 213_ R2 = 46% _F = 30.38	rs9808116	A	T	0.5528	-0.0041	0.0009	4.933e-06
Leucine_ K = 213_ R2 = 46% _F = 30.38	rs1884639	T	C	0.3865	0.0047	0.0009	2.316e-07
Leucine_ K = 213_ R2 = 46% _F = 30.38	rs1795964	A	G	0.4091	-0.0044	0.0009	1.978e-06
Leucine_ K = 213_ R2 = 46% _F = 30.38	rs629690	T	C	0.6458	-0.0041	0.0009	7.511e-06
Leucine_ K = 213_ R2 = 46% _F = 30.38	rs9322464	T	C	0.47	0.004	0.0009	8.271e-06
Leucine_ K = 213_ R2 = 46% _F = 30.38	rs4875396	T	C	0.4389	0.0042	0.0009	3.274e-06
Leucine_ K = 213_ R2 = 46% _F = 30.38	rs10004285	A	G	0.374	0.005	0.001	5.733e-07
Leucine_ K = 213_ R2 = 46% _F = 30.38	rs4016189	C	G	0.4191	0.0045	0.0009	4.741e-07
Leucine_ K = 213_ R2 = 46% _F = 30.38	rs10483512	A	G	0.461	0.0041	0.0009	4.706e-06
Leucine_ K = 213_ R2 = 46% _F = 30.38	rs637828	A	C	0.5424	0.0041	0.0009	5.812e-06
Leucine_ K = 213_ R2 = 46% _F = 30.38	rs899273	T	C	0.5202	0.0042	0.0009	3.334e-06
Leucine_ K = 213_ R2 = 46% _F = 30.38	rs2046395	A	G	0.541	0.0045	0.0009	6.279e-07
Leucine_ K = 213_ R2 = 46% _F = 30.38	rs11887097	A	G	0.4068	-0.0043	0.0009	2.412e-06
Leucine_ K = 213_ R2 = 46% _F = 30.38	rs1945443	T	C	0.6297	0.0041	0.0009	6.511e-06
Leucine_ K = 213_ R2 = 46% _F = 30.38	rs7082507	T	G	0.5142	0.0041	0.0009	5.116e-06
Leucine_ K = 213_ R2 = 46% _F = 30.38	rs7795093	A	G	0.3813	-0.0044	0.0009	1.474e-06
Leucine_ K = 213_ R2 = 46% _F = 30.38	rs13224934	T	C	0.5756	0.0046	0.0009	4.119e-07
Leucine_ K = 213_ R2 = 46% _F = 30.38	rs10180318	A	G	0.5681	0.0042	0.0009	2.44e-06
Leucine_ K = 213_ R2 = 46% _F = 30.38	rs17173197	T	C	0.3872	-0.0044	0.0009	2.464e-06
Leucine_ K = 213_ R2 = 46% _F = 30.38	rs1705832	T	C	0.395	0.0043	0.0009	1.898e-06
Leucine_ K = 213_ R2 = 46% _F = 30.38	rs4805013	A	T	0.5144	0.004	0.0009	9.504e-06
Leucine_ K = 213_ R2 = 46% _F = 30.38	rs4077470	T	C	0.5403	-0.0045	0.0009	4.646e-07
Leucine_ K = 213_ R2 = 46% _F = 30.38	rs11002782	A	G	0.5977	0.0041	0.0009	5.635e-06
Leucine_ K = 213_ R2 = 46% _F = 30.38	rs1971105	T	G	0.4305	-0.0041	0.0009	6.273e-06
Leucine_ K = 213_ R2 = 46% _F = 30.38	rs6723547	T	C	0.4778	0.004	0.0009	9.42e-06
Leucine_ K = 213_ R2 = 46% _F = 30.38	rs1003887	T	C	0.651	-0.005	0.001	5.733e-07
Leucine_ K = 213_ R2 = 46% _F = 30.38	rs2792614	T	C	0.4996	-0.0041	0.0009	5.313e-06
Leucine_ K = 213_ R2 = 46% _F = 30.38	rs7121554	T	C	0.2573	-0.007	0.0016	6.309e-06
Leucine_ K = 213_ R2 = 46% _F = 30.38	rs2513896	A	G	0.3526	0.0042	0.001	9.648e-06
Leucine_ K = 213_ R2 = 46% _F = 30.38	rs4795552	A	G	0.3894	-0.0047	0.0009	1.545e-07
Leucine_ K = 213_ R2 = 46% _F = 30.38	rs1172258	T	C	0.3795	-0.0046	0.0009	3.103e-07
Leucine_ K = 213_ R2 = 46% _F = 30.38	rs12344504	T	C	0.5957	-0.004	0.0009	6.704e-06
Leucine_ K = 213_ R2 = 46% _F = 30.38	rs2478832	T	C	0.3996	-0.0041	0.0009	8.046e-06
Leucine_ K = 213_ R2 = 46% _F = 30.38	rs4754098	A	G	0.493	-0.0046	0.001	1.652e-06
Leucine_ K = 213_ R2 = 46% _F = 30.38	rs2302423	A	G	0.55	0.0042	0.0009	2.818e-06
Leucine_ K = 213_ R2 = 46% _F = 30.38	rs13165077	A	G	0.3821	0.0041	0.0009	8.983e-06
Leucine_ K = 213_ R2 = 46% _F = 30.38	rs17107974	T	C	0.1068	-0.0082	0.0017	1.496e-06
Leucine_ K = 213_ R2 = 46% _F = 30.38	rs4074961	T	C	0.4317	-0.0044	0.001	4.228e-06
Leucine_ K = 213_ R2 = 46% _F = 30.38	rs7968823	T	C	0.4688	-0.004	0.0009	8.712e-06
Leucine_ K = 213_ R2 = 46% _F = 30.38	rs7366464	T	C	0.1258	-0.0075	0.0017	7.783e-06
Leucine_ K = 213_ R2 = 46% _F = 30.38	rs911981	A	G	0.5283	-0.0047	0.0009	2.403e-07
Leucine_ K = 213_ R2 = 46% _F = 30.38	rs720816	A	G	0.5425	0.004	0.0009	7.764e-06
Leucine_ K = 213_ R2 = 46% _F = 30.38	rs1581568	A	G	0.451	-0.0042	0.0009	3.127e-06
Leucine_ K = 213_ R2 = 46% _F = 30.38	rs1463301	T	C	0.5742	-0.0049	0.0009	7.493e-08
Leucine_ K = 213_ R2 = 46% _F = 30.38	rs7740614	A	G	0.4838	-0.0049	0.0009	4.746e-08
Leucine_ K = 213_ R2 = 46% _F = 30.38	rs1025466	T	C	0.4062	-0.0041	0.0009	6.253e-06
Leucine_ K = 213_ R2 = 46% _F = 30.38	rs7584842	T	C	0.5379	-0.0051	0.0009	1.892e-08
Leucine_ K = 213_ R2 = 46% _F = 30.38	rs477831	A	T	0.5102	0.0041	0.0009	4.654e-06
Leucine_ K = 213_ R2 = 46% _F = 30.38	rs7073430	A	C	0.4008	0.004	0.0009	9.946e-06
Leucine_ K = 213_ R2 = 46% _F = 30.38	rs757378	A	T	0.6095	-0.0042	0.0009	3.565e-06
Leucine_ K = 213_ R2 = 46% _F = 30.38	rs4726306	T	C	0.5692	0.004	0.0009	9.458e-06
Leucine_ K = 213_ R2 = 46% _F = 30.38	rs188423	T	C	0.4194	-0.004	0.0009	6.949e-06
Leucine_ K = 213_ R2 = 46% _F = 30.38	rs989960	T	C	0.4175	0.0041	0.0009	4.662e-06
Leucine_ K = 213_ R2 = 46% _F = 30.38	rs9403527	T	C	0.3456	0.0045	0.0009	9.914e-07
Leucine_ K = 213_ R2 = 46% _F = 30.38	rs7625991	A	C	0.345	-0.0042	0.0009	5.897e-06
Leucine_ K = 213_ R2 = 46% _F = 30.38	rs2471650	T	C	0.5252	-0.0048	0.0009	1.16e-07
Leucine_ K = 213_ R2 = 46% _F = 30.38	rs6737109	T	C	0.5761	0.0051	0.0009	1.454e-08
Leucine_ K = 213_ R2 = 46% _F = 30.38	rs10777730	C	G	0.5309	-0.0046	0.0009	2.683e-07
Leucine_ K = 213_ R2 = 46% _F = 30.38	rs825885	A	G	0.1469	-0.0097	0.002	1.558e-06
Leucine_ K = 213_ R2 = 46% _F = 30.38	rs979242	T	C	0.3692	-0.0043	0.0009	2.45e-06
Leucine_ K = 213_ R2 = 46% _F = 30.38	rs1654495	A	C	0.5709	0.0048	0.0009	1.036e-07
Leucine_ K = 213_ R2 = 46% _F = 30.38	rs2057435	A	G	0.535	0.0041	0.0009	7.945e-06
Leucine_ K = 213_ R2 = 46% _F = 30.38	rs1360820	A	G	0.4963	-0.0042	0.0009	2.154e-06
Leucine_ K = 213_ R2 = 46% _F = 30.38	rs167648	A	C	0.4439	-0.0041	0.0009	4.515e-06
Leucine_ K = 213_ R2 = 46% _F = 30.38	rs682359	T	G	0.5813	0.004	0.0009	6.342e-06
Leucine_ K = 213_ R2 = 46% _F = 30.38	rs11940185	A	G	0.4886	-0.0044	0.0009	8.551e-07
Leucine_ K = 213_ R2 = 46% _F = 30.38	rs477992	A	G	0.3228	-0.0047	0.0009	1.999e-07
Leucine_ K = 213_ R2 = 46% _F = 30.38	rs11684598	A	G	0.4878	-0.004	0.0009	6.676e-06
Leucine_ K = 213_ R2 = 46% _F = 30.38	rs11868948	A	G	0.6435	-0.0042	0.0009	4.628e-06
Leucine_ K = 213_ R2 = 46% _F = 30.38	rs17265788	C	G	0.2007	0.0071	0.0016	6.629e-06
Leucine_ K = 213_ R2 = 46% _F = 30.38	rs1519309	T	C	0.6543	-0.0043	0.0009	1.873e-06
Leucine_ K = 213_ R2 = 46% _F = 30.38	rs7685009	A	G	0.6582	-0.0045	0.0009	6.437e-07
Leucine_ K = 213_ R2 = 46% _F = 30.38	rs7996613	T	C	0.4683	-0.004	0.0009	9.674e-06
Leucine_ K = 213_ R2 = 46% _F = 30.38	rs900532	T	C	0.4524	-0.0044	0.0009	8.99e-07
Leucine_ K = 213_ R2 = 46% _F = 30.38	rs1677193	A	C	0.6122	-0.0044	0.0009	1.246e-06
Leucine_ K = 213_ R2 = 46% _F = 30.38	rs12498703	A	G	0.5998	-0.0042	0.0009	2.86e-06
Leucine_ K = 213_ R2 = 46% _F = 30.38	rs11988092	T	C	0.6185	-0.0046	0.0009	3.287e-07
Leucine_ K = 213_ R2 = 46% _F = 30.38	rs7911876	T	C	0.4276	0.0043	0.0009	2.757e-06
Leucine_ K = 213_ R2 = 46% _F = 30.38	rs1541245	T	C	0.5318	-0.0048	0.0009	7.988e-08
Leucine_ K = 213_ R2 = 46% _F = 30.38	rs37959	T	C	0.3912	0.0044	0.0009	1.708e-06
Leucine_ K = 213_ R2 = 46% _F = 30.38	rs9292230	T	C	0.6218	0.0041	0.0009	4.63e-06
Leucine_ K = 213_ R2 = 46% _F = 30.38	rs697311	A	G	0.3792	0.0041	0.0009	4.581e-06
Leucine_ K = 213_ R2 = 46% _F = 30.38	rs2489198	A	G	0.5165	-0.0044	0.0009	1.093e-06
Leucine_ K = 213_ R2 = 46% _F = 30.38	rs618001	T	C	0.5857	0.0041	0.0009	4.176e-06
Leucine_ K = 213_ R2 = 46% _F = 30.38	rs4948202	A	G	0.5056	0.0041	0.0009	4.858e-06
Leucine_ K = 213_ R2 = 46% _F = 30.38	rs7622687	A	G	0.4032	-0.0041	0.0009	5.212e-06
Leucine_ K = 213_ R2 = 46% _F = 30.38	rs12713072	A	T	0.6443	0.0041	0.0009	5.535e-06
Leucine_ K = 213_ R2 = 46% _F = 30.38	rs7513382	T	G	0.5171	-0.004	0.0009	7.052e-06
Leucine_ K = 213_ R2 = 46% _F = 30.38	rs10798580	A	G	0.4216	-0.0042	0.0009	3.64e-06
Leucine_ K = 213_ R2 = 46% _F = 30.38	rs11578928	A	C	0.4246	0.0041	0.0009	4.748e-06
Leucine_ K = 213_ R2 = 46% _F = 30.38	rs666870	A	G	0.4235	-0.0042	0.0009	5.732e-06
Leucine_ K = 213_ R2 = 46% _F = 30.38	rs7420162	C	G	0.455	0.005	0.001	2.696e-07
Leucine_ K = 213_ R2 = 46% _F = 30.38	rs923818	A	G	0.5072	0.0041	0.0009	6.232e-06
Leucine_ K = 213_ R2 = 46% _F = 30.38	rs2812137	A	G	0.5429	0.0042	0.0009	3.018e-06
Leucine_ K = 213_ R2 = 46% _F = 30.38	rs12648134	T	C	0.5179	0.0041	0.0009	4.985e-06
Leucine_ K = 213_ R2 = 46% _F = 30.38	rs9369741	T	G	0.5822	0.0043	0.0009	2.415e-06
Leucine_ K = 213_ R2 = 46% _F = 30.38	rs2285137	T	C	0.9436	-0.0108	0.0024	5.351e-06
Leucine_ K = 213_ R2 = 46% _F = 30.38	rs17636610	A	G	0.5244	0.0043	0.0009	1.812e-06
Leucine_ K = 213_ R2 = 46% _F = 30.38	rs308780	T	C	0.4655	-0.0042	0.0009	2.861e-06
Leucine_ K = 213_ R2 = 46% _F = 30.38	rs2273555	A	G	0.5874	0.0044	0.0009	9.212e-07
Leucine_ K = 213_ R2 = 46% _F = 30.38	rs1872800	A	T	0.6438	-0.004	0.0009	8.247e-06
Leucine_ K = 213_ R2 = 46% _F = 30.38	rs7541875	A	G	0.5897	-0.004	0.0009	7.651e-06
Leucine_ K = 213_ R2 = 46% _F = 30.38	rs8023420	A	C	0.0972	-0.0076	0.0017	8.852e-06
Leucine_ K = 213_ R2 = 46% _F = 30.38	rs6103893	A	C	0.5939	-0.0043	0.0009	2.717e-06
Leucine_ K = 213_ R2 = 46% _F = 30.38	rs11580409	A	C	0.6314	-0.004	0.0009	9.894e-06
Leucine_ K = 213_ R2 = 46% _F = 30.38	rs1560625	T	G	0.4972	-0.004	0.0009	6.869e-06
Leucine_ K = 213_ R2 = 46% _F = 30.38	rs498475	A	G	0.6277	-0.004	0.0009	6.656e-06
Leucine_ K = 213_ R2 = 46% _F = 30.38	rs2924146	C	G	0.3898	0.0042	0.0009	2.877e-06
Leucine_ K = 213_ R2 = 46% _F = 30.38	rs11117808	A	C	0.4457	0.004	0.0009	8.398e-06
Leucine_ K = 213_ R2 = 46% _F = 30.38	rs720293	A	G	0.4312	0.0043	0.0009	2.528e-06
Leucine_ K = 213_ R2 = 46% _F = 30.38	rs1428203	T	G	0.4117	0.0045	0.0009	5.513e-07
Leucine_ K = 213_ R2 = 46% _F = 30.38	rs1292666	T	C	0.4667	0.0045	0.0009	6.441e-07
Leucine_ K = 213_ R2 = 46% _F = 30.38	rs1334318	A	G	0.3572	0.0044	0.0009	1.008e-06
Leucine_ K = 213_ R2 = 46% _F = 30.38	rs17238008	T	C	0.9385	-0.0115	0.0024	1.425e-06
Leucine_ K = 213_ R2 = 46% _F = 30.38	rs6889147	A	T	0.5267	0.0078	0.0017	5.926e-06
Leucine_ K = 213_ R2 = 46% _F = 30.38	rs4889294	T	C	0.5449	-0.0041	0.0009	3.646e-06
Leucine_ K = 213_ R2 = 46% _F = 30.38	rs6562776	A	G	0.6116	-0.0043	0.0009	1.645e-06
Leucine_ K = 213_ R2 = 46% _F = 30.38	rs1155801	C	G	0.44	-0.004	0.0009	7.814e-06
Leucine_ K = 213_ R2 = 46% _F = 30.38	rs1558789	A	C	0.51	0.0045	0.0009	3.523e-07
Leucine_ K = 213_ R2 = 46% _F = 30.38	rs12517096	A	G	0.422	0.0041	0.0009	8.406e-06
Leucine_ K = 213_ R2 = 46% _F = 30.38	rs130561	A	C	0.5521	-0.0046	0.0009	3.613e-07
Leucine_ K = 213_ R2 = 46% _F = 30.38	rs10828678	A	G	0.5105	0.004	0.0009	7.202e-06
Leucine_ K = 213_ R2 = 46% _F = 30.38	rs7329192	T	C	0.5277	-0.0042	0.0009	3.165e-06
Leucine_ K = 213_ R2 = 46% _F = 30.38	rs4499783	T	C	0.5958	-0.004	0.0009	7.582e-06
Leucine_ K = 213_ R2 = 46% _F = 30.38	rs11144511	T	C	0.4497	-0.0042	0.0009	8.417e-06
Leucine_ K = 213_ R2 = 46% _F = 30.38	rs9521172	T	G	0.5149	-0.0045	0.0009	5.883e-07
Leucine_ K = 213_ R2 = 46% _F = 30.38	rs17698229	C	G	0.4567	0.0041	0.0009	8.998e-06
Leucine_ K = 213_ R2 = 46% _F = 30.38	rs4661637	C	G	0.4775	-0.0046	0.0009	3.554e-07
Leucine_ K = 213_ R2 = 46% _F = 30.38	rs4957023	T	C	0.4896	-0.004	0.0009	8.746e-06
Leucine_ K = 213_ R2 = 46% _F = 30.38	rs2595899	T	C	0.512	0.005	0.001	5.733e-07
Leucine_ K = 213_ R2 = 46% _F = 30.38	rs9827101	A	C	0.5372	0.0045	0.0009	7.787e-07
Leucine_ K = 213_ R2 = 46% _F = 30.38	rs11007082	T	G	0.3779	0.0043	0.0009	1.842e-06
Leucine_ K = 213_ R2 = 46% _F = 30.38	rs1278312	T	C	0.4008	-0.0042	0.0009	2.867e-06
Leucine_ K = 213_ R2 = 46% _F = 30.38	rs10818008	T	C	0.4971	0.004	0.0009	5.987e-06
Leucine_ K = 213_ R2 = 46% _F = 30.38	rs10911251	A	C	0.5759	-0.0047	0.0009	1.584e-07
Leucine_ K = 213_ R2 = 46% _F = 30.38	rs11203041	A	G	0.4458	-0.0043	0.0009	1.953e-06
Leucine_ K = 213_ R2 = 46% _F = 30.38	rs6003916	T	C	0.8966	0.0087	0.0018	1.057e-06
Leucine_ K = 213_ R2 = 46% _F = 30.38	rs679563	A	G	0.4837	-0.0045	0.0009	7.128e-07
Leucine_ K = 213_ R2 = 46% _F = 30.38	rs1511027	T	C	0.5519	0.0041	0.0009	5.629e-06
Leucine_ K = 213_ R2 = 46% _F = 30.38	rs7738860	T	C	0.4518	-0.0044	0.0009	1.312e-06
Leucine_ K = 213_ R2 = 46% _F = 30.38	rs7584322	A	C	0.4742	-0.0048	0.0009	7.033e-08
Leucine_ K = 213_ R2 = 46% _F = 30.38	rs8012205	A	G	0.4966	-0.0042	0.0009	2.564e-06
Leucine_ K = 213_ R2 = 46% _F = 30.38	rs11999261	A	T	0.0943	-0.0087	0.0017	6.559e-07
Leucine_ K = 213_ R2 = 46% _F = 30.38	rs9394683	T	C	0.5195	-0.004	0.0009	9.054e-06
Leucine_ K = 213_ R2 = 46% _F = 30.38	rs2592208	A	C	0.5155	-0.004	0.0009	7.817e-06
Leucine_ K = 213_ R2 = 46% _F = 30.38	rs11952637	A	G	0.4212	0.0043	0.0009	4.313e-06
Leucine_ K = 213_ R2 = 46% _F = 30.38	rs10810580	T	C	0.5583	0.0046	0.0009	3.282e-07
Leucine_ K = 213_ R2 = 46% _F = 30.38	rs1619856	T	C	0.5791	-0.004	0.0009	6.815e-06
Leucine_ K = 213_ R2 = 46% _F = 30.38	rs3775574	A	G	0.6047	-0.0044	0.0009	3.133e-06
Leucine_ K = 213_ R2 = 46% _F = 30.38	rs6470194	A	G	0.406	0.005	0.001	5.733e-07
Leucine_ K = 213_ R2 = 46% _F = 30.38	rs6820011	T	G	0.5152	-0.0051	0.0009	1.182e-08
Leucine_ K = 213_ R2 = 46% _F = 30.38	rs12047618	T	G	0.3271	0.0046	0.0009	4.25e-07
Leucine_ K = 213_ R2 = 46% _F = 30.38	rs9903421	T	C	0.5633	-0.0041	0.0009	7.394e-06
Leucine_ K = 213_ R2 = 46% _F = 30.38	rs7081719	T	C	0.5138	0.004	0.0009	7.676e-06
Leucine_ K = 213_ R2 = 46% _F = 30.38	rs17657877	C	G	0.371	-0.004	0.0009	7.334e-06
Leucine_ K = 213_ R2 = 46% _F = 30.38	rs6715113	A	G	0.5187	0.004	0.0009	7.546e-06
Leucine_ K = 213_ R2 = 46% _F = 30.38	rs3924223	A	G	0.549	-0.0041	0.0009	6.182e-06
Leucine_ K = 213_ R2 = 46% _F = 30.38	rs4935115	A	G	0.529	0.0045	0.0009	5.754e-07
Leucine_ K = 213_ R2 = 46% _F = 30.38	rs2667698	A	C	0.3681	0.0041	0.0009	7.071e-06
Leucine_ K = 213_ R2 = 46% _F = 30.38	rs9541214	T	C	0.6529	-0.005	0.0009	3.4e-08
Leucine_ K = 213_ R2 = 46% _F = 30.38	rs2834803	A	G	0.5707	0.004	0.0009	8.134e-06
Leucine_ K = 213_ R2 = 46% _F = 30.38	rs11801253	A	G	0.5461	0.0043	0.001	7.139e-06
Leucine_ K = 213_ R2 = 46% _F = 30.38	rs4276770	A	G	0.3999	-0.0041	0.0009	5.113e-06
Leucine_ K = 213_ R2 = 46% _F = 30.38	rs2722276	A	G	0.523	0.0048	0.0009	8.702e-08
Leucine_ K = 213_ R2 = 46% _F = 30.38	rs11615860	A	G	0.3903	-0.004	0.0009	8.047e-06
Leucine_ K = 213_ R2 = 46% _F = 30.38	rs4920094	A	G	0.3912	0.004	0.0009	7.179e-06
Leucine_ K = 213_ R2 = 46% _F = 30.38	rs13130810	T	C	0.4401	0.004	0.0009	7.791e-06
Leucine_ K = 213_ R2 = 46% _F = 30.38	rs11950442	A	G	0.3866	-0.0042	0.0009	3.008e-06
Leucine_ K = 213_ R2 = 46% _F = 30.38	rs769630	T	C	0.6016	0.0041	0.0009	5.064e-06
Leucine_ K = 213_ R2 = 46% _F = 30.38	rs2146498	A	G	0.5787	0.004	0.0009	8.041e-06
Leucine_ K = 213_ R2 = 46% _F = 30.38	rs10881004	T	C	0.4823	0.004	0.0009	8.931e-06
Leucine_ K = 213_ R2 = 46% _F = 30.38	rs1509396	C	G	0.5174	0.0046	0.0009	4.456e-07
Leucine_ K = 213_ R2 = 46% _F = 30.38	rs348869	A	G	0.5108	-0.0043	0.0009	1.954e-06
Leucine_ K = 213_ R2 = 46% _F = 30.38	rs6841731	A	G	0.5215	0.0071	0.0009	1.478e-15
Leucine_ K = 213_ R2 = 46% _F = 30.38	rs10763940	A	G	0.3654	0.0048	0.0009	1.174e-07
Leucine_ K = 213_ R2 = 46% _F = 30.38	rs4741887	A	G	0.4584	-0.0047	0.0009	1.68e-07
Leucine_ K = 213_ R2 = 46% _F = 30.38	rs6475359	A	G	0.4127	-0.0046	0.0009	3.573e-07
Leucine_ K = 213_ R2 = 46% _F = 30.38	rs2373642	A	G	0.0138	-0.0536	0.0117	4.722e-06
Leucine_ K = 213_ R2 = 46% _F = 30.38	rs1931001	T	G	0.3503	-0.0043	0.0009	1.622e-06
Leucine_ K = 213_ R2 = 46% _F = 30.38	rs7301176	T	C	0.4603	0.0043	0.0009	1.861e-06
Leucine_ K = 213_ R2 = 46% _F = 30.38	rs12644042	T	C	0.5489	-0.004	0.0009	7.935e-06
Leucine_ K = 213_ R2 = 46% _F = 30.38	rs1999120	A	G	0.5692	-0.0041	0.0009	4.039e-06
Leucine_ K = 213_ R2 = 46% _F = 30.38	rs2454043	A	C	0.588	-0.0047	0.0009	1.852e-07
Leucine_ K = 213_ R2 = 46% _F = 30.38	rs4756646	A	T	0.4588	-0.0043	0.0009	1.528e-06
Leucine_ K = 213_ R2 = 46% _F = 30.38	rs11241916	T	C	0.4946	0.0044	0.0009	9.416e-07
Leucine_ K = 213_ R2 = 46% _F = 30.38	rs13075986	T	G	0.6413	0.004	0.0009	9.767e-06
Leucine_ K = 213_ R2 = 46% _F = 30.38	rs978346	C	G	0.428	-0.0049	0.0009	5.726e-08
Leucine_ K = 213_ R2 = 46% _F = 30.38	rs1564480	A	G	0.4765	0.0045	0.0009	6.681e-07
Leucine_ K = 213_ R2 = 46% _F = 30.38	rs4767788	A	G	0.4189	0.0047	0.0009	5.738e-07
Leucine_ K = 213_ R2 = 46% _F = 30.38	rs982790	T	C	0.4106	-0.0044	0.0009	3.74e-06
Leucine_ K = 213_ R2 = 46% _F = 30.38	rs7669967	A	G	0.6167	0.004	0.0009	6.827e-06
Leucine_ K = 213_ R2 = 46% _F = 30.38	rs11041723	A	C	0.5209	-0.0043	0.0009	1.706e-06
Leucine_ K = 213_ R2 = 46% _F = 30.38	rs1333213	T	C	0.5703	-0.0041	0.0009	4.31e-06
Leucine_ K = 213_ R2 = 46% _F = 30.38	rs1368532	T	C	0.3842	-0.004	0.0009	8.855e-06
Leucine_ K = 213_ R2 = 46% _F = 30.38	rs12612007	A	G	0.3461	0.0044	0.0009	1.202e-06
Leucine_ K = 213_ R2 = 46% _F = 30.38	rs390836	A	T	0.415	0.0045	0.0009	8.059e-07
Leucine_ K = 213_ R2 = 46% _F = 30.38	rs606798	T	G	0.3722	0.004	0.0009	9.901e-06
Leucine_ K = 213_ R2 = 46% _F = 30.38	rs720625	A	G	0.6267	-0.0046	0.0009	4.655e-07
Leucine_ K = 213_ R2 = 46% _F = 30.38	rs440752	T	C	0.6472	-0.0046	0.0009	2.689e-07
Leucine_ K = 213_ R2 = 46% _F = 30.38	rs3819041	C	G	0.5829	-0.0044	0.0009	1.114e-06
Leucine_ K = 213_ R2 = 46% _F = 30.38	rs759456	T	G	0.6263	0.0042	0.0009	3.733e-06
Leucine_ K = 213_ R2 = 46% _F = 30.38	rs4148593	A	G	0.624	0.005	0.001	5.733e-07
Leucine_ K = 213_ R2 = 46% _F = 30.38	rs797348	A	G	0.6447	0.004	0.0009	9.666e-06
Leucine_ K = 213_ R2 = 46% _F = 30.38	rs2192520	T	C	0.5196	0.004	0.0009	9.325e-06
Leucine_ K = 213_ R2 = 46% _F = 30.38	rs6543342	T	C	0.3778	0.004	0.0009	8.561e-06
Leucine_ K = 213_ R2 = 46% _F = 30.38	rs1817551	T	C	0.4876	0.004	0.0009	8.898e-06
Leucine_ K = 213_ R2 = 46% _F = 30.38	rs10954411	A	T	0.3772	0.0043	0.0009	1.809e-06
Leucine_ K = 213_ R2 = 46% _F = 30.38	rs481781	T	C	0.5409	0.0044	0.0009	9.144e-07
Leucine_ K = 213_ R2 = 46% _F = 30.38	rs2898645	T	C	0.545	-0.005	0.001	5.733e-07
Leucine_ K = 213_ R2 = 46% _F = 30.38	rs3906146	T	C	0.4446	0.004	0.0009	7.774e-06
Leucine_ K = 213_ R2 = 46% _F = 30.38	rs10973683	A	C	0.4002	-0.0041	0.0009	6.541e-06
Leucine_ K = 213_ R2 = 46% _F = 30.38	rs4681618	A	G	0.5793	-0.0042	0.0009	3.149e-06
Leucine_ K = 213_ R2 = 46% _F = 30.38	rs12196614	A	T	0.9386	0.0107	0.0024	6.418e-06
Leucine_ K = 213_ R2 = 46% _F = 30.38	rs8131355	A	G	0.5488	-0.0041	0.0009	5.681e-06
Leucine_ K = 213_ R2 = 46% _F = 30.38	rs9983763	A	G	0.599	0.0042	0.0009	2.782e-06
Leucine_ K = 213_ R2 = 46% _F = 30.38	rs12355470	T	C	0.6071	-0.004	0.0009	7.675e-06
Leucine_ K = 213_ R2 = 46% _F = 30.38	rs4767229	A	G	0.5618	0.004	0.0009	9.994e-06
Leucine_ K = 213_ R2 = 46% _F = 30.38	rs4753700	A	C	0.5481	0.0041	0.0009	7.565e-06
Leucine_ K = 213_ R2 = 46% _F = 30.38	rs6588636	T	C	0.611	-0.004	0.0009	9.935e-06
Leucine_ K = 213_ R2 = 46% _F = 30.38	rs2649733	C	G	0.3832	0.0042	0.0009	3.669e-06
Leucine_ K = 213_ R2 = 46% _F = 30.38	rs4073959	A	G	0.4711	0.0041	0.0009	6.184e-06
Leucine_ K = 213_ R2 = 46% _F = 30.38	rs2624695	T	C	0.5102	-0.004	0.0009	8.941e-06
Leucine_ K = 213_ R2 = 46% _F = 30.38	rs12651056	A	G	0.5661	-0.004	0.0009	7.371e-06
Leucine_ K = 213_ R2 = 46% _F = 30.38	rs2634945	T	C	0.5502	0.0048	0.0009	7.765e-08
Leucine_ K = 213_ R2 = 46% _F = 30.38	rs1822834	C	G	0.0629	0.0108	0.0024	6.594e-06
Cholesterol Number of SNPs: 47 Variation explained (R2): 12.4% F statistic: 23.41	rs11099549	T	C	0.2076	-0.0079	0.0017	5.13e-06
Cholesterol_ K = 47_ R2 = 12.4% _F = 23.41	rs6511720	T	G	0.1197	-0.0136	0.0027	3.688e-07
Cholesterol_ K = 47_ R2 = 12.4% _F = 23.41	rs1387676	T	G	0.7537	-0.0082	0.0018	7.948e-06
Cholesterol_ K = 47_ R2 = 12.4% _F = 23.41	rs886282	T	C	0.1989	0.0081	0.0018	3.711e-06
Cholesterol_ K = 47_ R2 = 12.4% _F = 23.41	rs12648765	A	G	0.9861	0.0564	0.0122	3.568e-06
Cholesterol_ K = 47_ R2 = 12.4% _F = 23.41	rs6573766	T	G	0.8061	-0.0085	0.0018	1.549e-06
Cholesterol_ K = 47_ R2 = 12.4% _F = 23.41	rs1005596	A	G	0.1014	0.0115	0.0025	4.195e-06
Cholesterol_ K = 47_ R2 = 12.4% _F = 23.41	rs12881180	T	C	0.1867	-0.0081	0.0018	5.246e-06
Cholesterol_ K = 47_ R2 = 12.4% _F = 23.41	rs445925	A	G	0.079	-0.025	0.004	4.105e-10
Cholesterol_ K = 47_ R2 = 12.4% _F = 23.41	rs2869804	A	G	0.2489	0.0078	0.0017	6.503e-06
Cholesterol_ K = 47_ R2 = 12.4% _F = 23.41	rs17683567	T	C	0.2146	0.0078	0.0017	7.567e-06
Cholesterol_ K = 47_ R2 = 12.4% _F = 23.41	rs11813145	A	G	0.3414	0.0076	0.0017	5.867e-06
Cholesterol_ K = 47_ R2 = 12.4% _F = 23.41	rs11577912	A	C	0.7926	-0.0081	0.0018	4.288e-06
Cholesterol_ K = 47_ R2 = 12.4% _F = 23.41	rs17293443	T	C	0.7718	0.0078	0.0017	8.091e-06
Cholesterol_ K = 47_ R2 = 12.4% _F = 23.41	rs1077835	A	G	0.7912	-0.0108	0.0023	2.444e-06
Cholesterol_ K = 47_ R2 = 12.4% _F = 23.41	rs7200440	T	C	0.548	-0.0074	0.0016	7.024e-06
Cholesterol_ K = 47_ R2 = 12.4% _F = 23.41	rs2242196	T	C	0.8137	-0.008	0.0018	5.743e-06
Cholesterol_ K = 47_ R2 = 12.4% _F = 23.41	rs17765253	A	G	0.1845	0.0096	0.0018	8.265e-08
Cholesterol_ K = 47_ R2 = 12.4% _F = 23.41	rs10207315	T	G	0.2432	0.0078	0.0017	4.789e-06
Cholesterol_ K = 47_ R2 = 12.4% _F = 23.41	rs13131908	A	G	0.9153	0.0163	0.0032	3.606e-07
Cholesterol_ K = 47_ R2 = 12.4% _F = 23.41	rs7761068	A	G	0.5758	-0.0076	0.0017	5.787e-06
Cholesterol_ K = 47_ R2 = 12.4% _F = 23.41	rs7329734	T	C	0.8201	-0.0081	0.0018	5.683e-06
Cholesterol_ K = 47_ R2 = 12.4% _F = 23.41	rs1124515	A	G	0.2539	-0.0078	0.0017	6.006e-06
Cholesterol_ K = 47_ R2 = 12.4% _F = 23.41	rs1433904	T	C	0.0228	0.0442	0.0097	5.056e-06
Cholesterol_ K = 47_ R2 = 12.4% _F = 23.41	rs11106131	T	G	0.2379	-0.0089	0.0019	1.807e-06
Cholesterol_ K = 47_ R2 = 12.4% _F = 23.41	rs4602115	T	G	0.7133	0.0146	0.0033	7.651e-06
Cholesterol_ K = 47_ R2 = 12.4% _F = 23.41	rs2026590	T	G	0.2176	0.008	0.0017	3.764e-06
Cholesterol_ K = 47_ R2 = 12.4% _F = 23.41	rs10011091	T	C	0.8159	0.0086	0.0018	2.151e-06
Cholesterol_ K = 47_ R2 = 12.4% _F = 23.41	rs4941743	T	C	0.2179	0.0087	0.0017	3.282e-07
Cholesterol_ K = 47_ R2 = 12.4% _F = 23.41	rs7315994	C	G	0.8992	0.0116	0.0025	3.242e-06
Cholesterol_ K = 47_ R2 = 12.4% _F = 23.41	rs6438925	T	G	0.9033	0.0127	0.0025	5.533e-07
Cholesterol_ K = 47_ R2 = 12.4% _F = 23.41	rs1411983	A	T	0.594	-0.0073	0.0017	9.208e-06
Cholesterol_ K = 47_ R2 = 12.4% _F = 23.41	rs2259571	T	G	0.6893	-0.0078	0.0017	2.864e-06
Cholesterol_ K = 47_ R2 = 12.4% _F = 23.41	rs17182784	T	C	0.253	-0.0082	0.0017	2.1e-06
Cholesterol_ K = 47_ R2 = 12.4% _F = 23.41	rs1778777	A	C	0.777	-0.009	0.002	6.795e-06
Cholesterol_ K = 47_ R2 = 12.4% _F = 23.41	rs11111293	T	C	0.7914	-0.008	0.0018	6.118e-06
Cholesterol_ K = 47_ R2 = 12.4% _F = 23.41	rs2050223	A	G	0.2016	-0.0078	0.0017	7.22e-06
Cholesterol_ K = 47_ R2 = 12.4% _F = 23.41	rs4401492	T	G	0.1795	0.0082	0.0018	4.515e-06
Cholesterol_ K = 47_ R2 = 12.4% _F = 23.41	rs6603141	A	G	0.258	-0.0081	0.0017	2.608e-06
Cholesterol_ K = 47_ R2 = 12.4% _F = 23.41	rs810551	C	G	0.7904	0.008	0.0017	4.659e-06
Cholesterol_ K = 47_ R2 = 12.4% _F = 23.41	rs11022174	A	G	0.295	0.0101	0.0023	7.361e-06
Cholesterol_ K = 47_ R2 = 12.4% _F = 23.41	rs6970076	T	C	0.7679	-0.0079	0.0017	4.366e-06
Cholesterol_ K = 47_ R2 = 12.4% _F = 23.41	rs2076334	C	G	0.7581	-0.0076	0.0017	8.984e-06
Cholesterol_ K = 47_ R2 = 12.4% _F = 23.41	rs1479402	T	C	0.0137	0.0306	0.0068	6.854e-06
Cholesterol_ K = 47_ R2 = 12.4% _F = 23.41	rs871748	T	C	0.182	-0.0082	0.0018	8.562e-06
Cholesterol_ K = 47_ R2 = 12.4% _F = 23.41	rs599839	A	G	0.7791	0.0086	0.0017	7.276e-07
Cholesterol_ K = 47_ R2 = 12.4% _F = 23.41	rs2870664	T	C	0.4767	0.0147	0.0031	1.602e-06
Phenylalanine Number of SNPs: 5 Variation explained (R2): 1.6% F statistic: 25.52	rs870072	T	C	0.594	-0.0071	0.0011	4.029e-10
Phenylalanine_ K = 5_ R2 = 1.6% _F = 25.52	rs6831907	T	C	0.0395	0.0206	0.0046	7.053e-06
Phenylalanine_ K = 5_ R2 = 1.6% _F = 25.52	rs10050054	T	C	0.9828	-0.0325	0.0069	2.583e-06
Phenylalanine_ K = 5_ R2 = 1.6% _F = 25.52	rs1565225	A	G	0.245	0.007	0.0015	2.342e-06
Phenylalanine_ K = 5_ R2 = 1.6% _F = 25.52	rs7215555	A	G	0.6847	0.0055	0.0012	3.391e-06
Creatinine Number of SNPs: 26 Variation explained (R2): 7.1% F statistic: 23.08	rs10426415	A	G	0.878	-0.0086	0.0018	3.109e-06
Creatinine_ K = 26_ R2 = 7.1% _F = 23.08	rs9477021	C	G	0.0178	-0.0236	0.0053	7.726e-06
Creatinine_ K = 26_ R2 = 7.1% _F = 23.08	rs9456538	A	G	0.1493	-0.0082	0.0018	4.198e-06
Creatinine_ K = 26_ R2 = 7.1% _F = 23.08	rs473059	A	C	0.1163	0.0086	0.0018	2.326e-06
Creatinine_ K = 26_ R2 = 7.1% _F = 23.08	rs11694230	T	C	0.3363	-0.0075	0.0017	9.003e-06
Creatinine_ K = 26_ R2 = 7.1% _F = 23.08	rs394282	A	T	0.1112	-0.0163	0.0033	1.016e-06
Creatinine_ K = 26_ R2 = 7.1% _F = 23.08	rs10519445	A	G	0.5338	-0.0045	0.0009	1.846e-06
Creatinine_ K = 26_ R2 = 7.1% _F = 23.08	rs6495181	T	C	0.5209	0.0042	0.0009	8.692e-06
Creatinine_ K = 26_ R2 = 7.1% _F = 23.08	rs2048277	A	G	0.8956	0.0083	0.0019	8.751e-06
Creatinine_ K = 26_ R2 = 7.1% _F = 23.08	rs2194483	A	G	0.48	0.005	0.0009	1.349e-07
Creatinine_ K = 26_ R2 = 7.1% _F = 23.08	rs6502247	A	G	0.119	-0.009	0.002	6.795e-06
Creatinine_ K = 26_ R2 = 7.1% _F = 23.08	rs9312777	T	C	0.4788	0.0043	0.0009	4.677e-06
Creatinine_ K = 26_ R2 = 7.1% _F = 23.08	rs11638382	T	C	0.1875	-0.0171	0.0038	5.062e-06
Creatinine_ K = 26_ R2 = 7.1% _F = 23.08	rs6663614	A	C	0.2085	-0.0104	0.0022	3.057e-06
Creatinine_ K = 26_ R2 = 7.1% _F = 23.08	rs12801550	T	C	0.8705	0.0088	0.0018	9.639e-07
Creatinine_ K = 26_ R2 = 7.1% _F = 23.08	rs12175103	A	C	0.4153	0.0048	0.0009	4.863e-07
Creatinine_ K = 26_ R2 = 7.1% _F = 23.08	rs4460629	T	C	0.5224	-0.0045	0.001	2.205e-06
Creatinine_ K = 26_ R2 = 7.1% _F = 23.08	rs2007258	C	G	0.8924	-0.0082	0.0019	9.542e-06
Creatinine_ K = 26_ R2 = 7.1% _F = 23.08	rs2289804	A	G	0.9343	-0.0143	0.0027	1.246e-07
Creatinine_ K = 26_ R2 = 7.1% _F = 23.08	rs10202838	C	G	0.5288	0.0137	0.0029	3.321e-06
Creatinine_ K = 26_ R2 = 7.1% _F = 23.08	rs1955135	A	C	0.8659	0.008	0.0018	9.994e-06
Creatinine_ K = 26_ R2 = 7.1% _F = 23.08	rs2521310	T	C	0.874	0.009	0.002	6.795e-06
Creatinine_ K = 26_ R2 = 7.1% _F = 23.08	rs1990178	T	C	0.1943	-0.0164	0.0036	6.272e-06
Creatinine_ K = 26_ R2 = 7.1% _F = 23.08	rs11054328	T	C	0.1072	0.0088	0.0018	1.456e-06
Creatinine_ K = 26_ R2 = 7.1% _F = 23.08	rs17495916	T	C	0.4965	0.0043	0.0009	5.283e-06
Creatinine_ K = 26_ R2 = 7.1% _F = 23.08	rs17533525	T	C	0.1534	0.0082	0.0018	5.037e-06
Creatinine_ K = 26_ R2 = 7.1% _F = 23.08	rs13031396	T	G	0.2473	-0.0076	0.0017	9.166e-06
Lactate Number of SNPs: 13 Variation explained (R2): 3.5% F statistic: 21.6	rs9582841	A	T	0.2227	-0.0198	0.0041	1.733e-06
Lactate_ K = 13_ R2 = 3.5% _F = 21.6	rs7595585	A	T	0.1434	0.0215	0.0048	7.438e-06
Lactate_ K = 13_ R2 = 3.5% _F = 21.6	rs2242578	C	G	0.6704	-0.0111	0.0024	5.078e-06
Lactate_ K = 13_ R2 = 3.5% _F = 21.6	rs4635489	A	G	0.0177	0.0364	0.008	5.663e-06
Lactate_ K = 13_ R2 = 3.5% _F = 21.6	rs16937124	A	C	0.9471	-0.021	0.0046	5.622e-06
Lactate_ K = 13_ R2 = 3.5% _F = 21.6	rs780093	T	C	0.4	0.0117	0.0023	1.887e-07
Lactate_ K = 13_ R2 = 3.5% _F = 21.6	rs4718532	T	C	0.5052	-0.016	0.0035	6.605e-06
Lactate_ K = 13_ R2 = 3.5% _F = 21.6	rs3785024	A	G	0.9469	-0.0223	0.0049	5.562e-06
Lactate_ K = 13_ R2 = 3.5% _F = 21.6	rs1876100	A	T	0.2626	-0.0106	0.0024	9.204e-06
Lactate_ K = 13_ R2 = 3.5% _F = 21.6	rs2000812	T	C	0.8223	0.0111	0.0025	9.7e-06
Lactate_ K = 13_ R2 = 3.5% _F = 21.6	rs10788232	T	C	0.6825	-0.0111	0.0024	2.464e-06
Lactate_ K = 13_ R2 = 3.5% _F = 21.6	rs1193346	A	G	0.0651	0.0208	0.0045	3.465e-06
Lactate_ K = 13_ R2 = 3.5% _F = 21.6	rs6593201	A	G	0.192	-0.0109	0.0024	8.359e-06
3-Hydroxybutyrate (Bhba) Number of SNPs: 10 Variation explained (R2): 2.7% F statistic: 21.62	rs8000457	T	C	0.9661	-0.2093	0.0433	1.351e-06
3-Hydroxybutyrate (Bhba)_ K = 10_ R2 = 2.7% _F = 21.62	rs2711506	A	G	0.5343	-0.0326	0.0072	6.349e-06
3-Hydroxybutyrate (Bhba)_ K = 10_ R2 = 2.7% _F = 21.62	rs13288937	A	C	0.0205	0.2488	0.0526	2.287e-06
3-Hydroxybutyrate (Bhba)_ K = 10_ R2 = 2.7% _F = 21.62	rs1348656	T	C	0.7981	-0.0436	0.0088	7.287e-07
3-Hydroxybutyrate (Bhba)_ K = 10_ R2 = 2.7% _F = 21.62	rs2249219	C	G	0.2839	0.0362	0.0081	7.545e-06
3-Hydroxybutyrate (Bhba)_ K = 10_ R2 = 2.7% _F = 21.62	rs4838537	T	C	0.0133	0.3226	0.0699	3.964e-06
3-Hydroxybutyrate (Bhba)_ K = 10_ R2 = 2.7% _F = 21.62	rs7314742	T	G	0.2662	-0.0358	0.008	8.508e-06
3-Hydroxybutyrate (Bhba)_ K = 10_ R2 = 2.7% _F = 21.62	rs2295758	T	C	0.9754	-0.1137	0.0255	8.568e-06
3-Hydroxybutyrate (Bhba)_ K = 10_ R2 = 2.7% _F = 21.62	rs17508336	A	G	0.9524	-0.0891	0.0193	3.87e-06
3-Hydroxybutyrate (Bhba)_ K = 10_ R2 = 2.7% _F = 21.62	rs11224003	A	G	0.177	0.0419	0.0093	7.072e-06
Cotinine Number of SNPs: 21 Variation explained (R2): 5.6% F statistic: 22.24	rs2660053	A	T	0.2015	-0.1012	0.0216	2.703e-06
Cotinine_ K = 21_ R2 = 5.6% _F = 22.24	rs2036527	A	G	0.3429	0.0791	0.0177	8.05e-06
Cotinine_ K = 21_ R2 = 5.6% _F = 22.24	rs6881631	T	C	0.8116	0.1031	0.0212	1.187e-06
Cotinine_ K = 21_ R2 = 5.6% _F = 22.24	rs9614980	A	C	0.5507	0.0855	0.0193	9.401e-06
Cotinine_ K = 21_ R2 = 5.6% _F = 22.24	rs9629017	T	C	0.5132	0.0764	0.0166	4.011e-06
Cotinine_ K = 21_ R2 = 5.6% _F = 22.24	rs9586098	A	C	0.0142	-0.6044	0.1287	2.672e-06
Cotinine_ K = 21_ R2 = 5.6% _F = 22.24	rs7701941	C	G	0.0194	-0.5561	0.1115	6.097e-07
Cotinine_ K = 21_ R2 = 5.6% _F = 22.24	rs11895833	A	C	0.0303	-0.3955	0.0827	1.737e-06
Cotinine_ K = 21_ R2 = 5.6% _F = 22.24	rs2288417	A	C	0.8886	0.1192	0.0268	8.597e-06
Cotinine_ K = 21_ R2 = 5.6% _F = 22.24	rs1383634	T	C	0.2311	-0.0946	0.0204	3.355e-06
Cotinine_ K = 21_ R2 = 5.6% _F = 22.24	rs6937824	A	G	0.9848	0.3315	0.0697	1.982e-06
Cotinine_ K = 21_ R2 = 5.6% _F = 22.24	rs7359970	C	G	0.8975	0.2147	0.0451	1.927e-06
Cotinine_ K = 21_ R2 = 5.6% _F = 22.24	rs2543104	T	C	0.5276	0.0808	0.0167	1.279e-06
Cotinine_ K = 21_ R2 = 5.6% _F = 22.24	rs2075317	T	C	0.5417	0.0732	0.0165	9.187e-06
Cotinine_ K = 21_ R2 = 5.6% _F = 22.24	rs6837925	T	C	0.9894	0.6533	0.1385	2.403e-06
Cotinine_ K = 21_ R2 = 5.6% _F = 22.24	rs12511407	A	T	0.436	-0.1357	0.0285	1.937e-06
Cotinine_ K = 21_ R2 = 5.6% _F = 22.24	rs1818902	T	C	0.9701	0.5718	0.1255	5.205e-06
Cotinine_ K = 21_ R2 = 5.6% _F = 22.24	rs7482087	T	C	0.0254	-0.5162	0.1064	1.237e-06
Cotinine_ K = 21_ R2 = 5.6% _F = 22.24	rs1556938	T	G	0.0466	-0.1815	0.041	9.589e-06
Cotinine_ K = 21_ R2 = 5.6% _F = 22.24	rs1605457	T	C	0.9643	0.3731	0.08	3.097e-06
Cotinine_ K = 21_ R2 = 5.6% _F = 22.24	rs6816298	A	G	0.8254	0.1842	0.0403	4.76e-06
Cotinine_ K = 21_ R2 = 5.6% _F = 22.24	rs6468437	T	C	0.8334	0.1246	0.0277	6.86e-06
Caffeine Number of SNPs: 10 Variation explained (R2): 2.7% F statistic: 22	rs10935899	C	G	0.8197	-0.0506	0.011	4.539e-06
Caffeine_ K = 10_ R2 = 2.7% _F = 22	rs1397829	A	G	0.5328	0.042	0.0085	7.076e-07
Caffeine_ K = 10_ R2 = 2.7% _F = 22	rs6603123	T	G	0.3939	0.0865	0.0193	7.84e-06
Caffeine_ K = 10_ R2 = 2.7% _F = 22	rs2446427	T	C	0.8371	-0.0554	0.0122	5.211e-06
Caffeine_ K = 10_ R2 = 2.7% _F = 22	rs2277152	C	G	0.0555	-0.0843	0.0188	7.157e-06
Caffeine_ K = 10_ R2 = 2.7% _F = 22	rs2493277	C	G	0.6552	0.0605	0.0127	1.914e-06
Caffeine_ K = 10_ R2 = 2.7% _F = 22	rs8096497	A	G	0.097	0.089	0.0163	4.836e-08
Caffeine_ K = 10_ R2 = 2.7% _F = 22	rs16902976	T	G	0.0232	-0.1325	0.0294	6.361e-06
Caffeine_ K = 10_ R2 = 2.7% _F = 22	rs4886649	T	C	0.6547	0.0424	0.0095	8.817e-06
Caffeine_ K = 10_ R2 = 2.7% _F = 22	rs17137472	T	C	0.5085	-0.0471	0.0087	6.032e-08
Caffeine_ K = 10_ R2 = 2.7% _F = 22	rs384814	A	G	0.0255	0.1452	0.0326	8.35e-06
Caffeine_ K = 10_ R2 = 2.7% _F = 22	rs1039293	A	G	0.4948	0.0709	0.0153	3.393e-06
Arabinose Number of SNPs: 6 Variation explained (R2): 1.6% F statistic: 21.45	rs12091176	A	G	0.0264	0.127	0.0271	2.814e-06
Arabinose_ K = 6_ R2 = 1.6% _F = 21.45	rs13141546	A	T	0.0303	-0.0766	0.0171	7.312e-06
Arabinose_ K = 6_ R2 = 1.6% _F = 21.45	rs2313872	T	G	0.9837	-0.1966	0.0425	3.826e-06
Arabinose_ K = 6_ R2 = 1.6% _F = 21.45	rs7790791	T	C	0.0873	0.0594	0.013	4.672e-06
Arabinose_ K = 6_ R2 = 1.6% _F = 21.45	rs12426131	A	G	0.1446	0.0246	0.0051	1.681e-06
Arabinose_ K = 6_ R2 = 1.6% _F = 21.45	rs33976862	C	G	0.0674	0.0602	0.0135	7.764e-06
Arabinose_ K = 6_ R2 = 1.6% _F = 21.45	rs491459	C	G	0.21	-0.025	0.0053	2.342e-06
Fructose Number of SNPs: 3 Variation explained (R2): 0.8% F statistic: 21.55	rs598116	A	G	0.9189	-0.0298	0.0065	5.425e-06
Fructose_ K = 3_ R2 = 0.8% _F = 21.55	rs4663119	A	G	0.0773	0.0331	0.0074	7.324e-06
Fructose_ K = 3_ R2 = 0.8% _F = 21.55	rs11672844	A	G	0.4614	0.0179	0.0037	1.642e-06
Mannose Number of SNPs: 25 Variation explained (R2): 7.7% F statistic: 26.11	rs4980268	A	G	0.9184	0.019	0.0039	1.555e-06
Mannose_ K = 25_ R2 = 7.7% _F = 26.11	rs2723713	T	C	0.0254	-0.0356	0.008	9.19e-06
Mannose_ K = 25_ R2 = 7.7% _F = 26.11	rs7007251	A	G	0.1057	-0.015	0.0034	8.76e-06
Mannose_ K = 25_ R2 = 7.7% _F = 26.11	rs2304684	T	C	0.0182	-0.0438	0.0094	3.021e-06
Mannose_ K = 25_ R2 = 7.7% _F = 26.11	rs12414366	C	G	0.7696	0.0214	0.0047	4.889e-06
Mannose_ K = 25_ R2 = 7.7% _F = 26.11	rs2217742	A	G	0.3433	-0.011	0.0025	6.81e-06
Mannose_ K = 25_ R2 = 7.7% _F = 26.11	rs13116473	A	G	0.9853	-0.0448	0.0096	2.932e-06
Mannose_ K = 25_ R2 = 7.7% _F = 26.11	rs7349418	T	C	0.5484	0.0154	0.0024	1.847e-10
Mannose_ K = 25_ R2 = 7.7% _F = 26.11	rs2272172	T	C	0.0226	-0.0648	0.0145	7.508e-06
Mannose_ K = 25_ R2 = 7.7% _F = 26.11	rs12474099	A	G	0.0649	-0.0202	0.0043	1.968e-06
Mannose_ K = 25_ R2 = 7.7% _F = 26.11	rs10495762	A	G	0.8973	0.0172	0.0033	2.548e-07
Mannose_ K = 25_ R2 = 7.7% _F = 26.11	rs6718128	T	C	0.4818	-0.0124	0.0024	2.015e-07
Mannose_ K = 25_ R2 = 7.7% _F = 26.11	rs991670	T	C	0.6624	-0.0111	0.0025	7.476e-06
Mannose_ K = 25_ R2 = 7.7% _F = 26.11	rs2141371	A	G	0.682	-0.0198	0.0024	3.271e-16
Mannose_ K = 25_ R2 = 7.7% _F = 26.11	rs12993595	T	G	0.013	0.098	0.0219	7.275e-06
Mannose_ K = 25_ R2 = 7.7% _F = 26.11	rs7747345	A	T	0.8153	0.0122	0.0026	2.524e-06
Mannose_ K = 25_ R2 = 7.7% _F = 26.11	rs10982244	A	G	0.6098	-0.0177	0.004	8.931e-06
Mannose_ K = 25_ R2 = 7.7% _F = 26.11	rs1841535	T	G	0.1482	0.0252	0.0056	6.998e-06
Mannose_ K = 25_ R2 = 7.7% _F = 26.11	rs435315	A	T	0.2033	-0.0121	0.0026	2.18e-06
Mannose_ K = 25_ R2 = 7.7% _F = 26.11	rs7583698	T	C	0.0483	0.0338	0.0049	8.549e-12
Mannose_ K = 25_ R2 = 7.7% _F = 26.11	rs4720083	C	G	0.7886	0.0114	0.0026	8.419e-06
Mannose_ K = 25_ R2 = 7.7% _F = 26.11	rs16932803	T	G	0.1673	-0.0121	0.0026	5.005e-06
Mannose_ K = 25_ R2 = 7.7% _F = 26.11	rs2270451	A	G	0.8941	0.0152	0.0034	7.525e-06
Mannose_ K = 25_ R2 = 7.7% _F = 26.11	rs11676911	A	G	0.0216	-0.0429	0.0084	3.659e-07
Mannose_ K = 25_ R2 = 7.7% _F = 26.11	rs17061914	A	G	0.8581	-0.0146	0.0033	8.766e-06
Mannose_ K = 25_ R2 = 7.7% _F = 26.11	rs1181723	A	G	0.2086	0.0116	0.0026	5.629e-06
Pyruvate Number of SNPs: 14 Variation explained (R2): 3.7% F statistic: 21.52	rs2833657	A	G	0.8254	0.0239	0.0051	3.023e-06
Pyruvate_ K = 14_ R2 = 3.7% _F = 21.52	rs1133034	T	C	0.0757	0.032	0.0069	3.906e-06
Pyruvate_ K = 14_ R2 = 3.7% _F = 21.52	rs4648464	A	G	0.5522	-0.0161	0.0036	9.373e-06
Pyruvate_ K = 14_ R2 = 3.7% _F = 21.52	rs10237319	T	C	0.1467	0.0226	0.0051	9.785e-06
Pyruvate_ K = 14_ R2 = 3.7% _F = 21.52	rs11259923	A	G	0.8139	0.042	0.0091	3.916e-06
Pyruvate_ K = 14_ R2 = 3.7% _F = 21.52	rs7136674	T	G	0.5076	-0.0158	0.0035	6.45e-06
Pyruvate_ K = 14_ R2 = 3.7% _F = 21.52	rs924483	A	G	0.0916	-0.0289	0.0062	3.254e-06
Pyruvate_ K = 14_ R2 = 3.7% _F = 21.52	rs10892074	T	G	0.4491	0.0168	0.0035	1.604e-06
Pyruvate_ K = 14_ R2 = 3.7% _F = 21.52	rs4756044	A	C	0.7557	-0.019	0.0043	9.415e-06
Pyruvate_ K = 14_ R2 = 3.7% _F = 21.52	rs2964065	A	G	0.9836	-0.0646	0.0144	7.158e-06
Pyruvate_ K = 14_ R2 = 3.7% _F = 21.52	rs7751620	A	G	0.2059	0.0206	0.0043	1.997e-06
Pyruvate_ K = 14_ R2 = 3.7% _F = 21.52	rs12515830	T	G	0.8744	0.0244	0.0054	5.788e-06
Pyruvate_ K = 14_ R2 = 3.7% _F = 21.52	rs6895278	T	C	0.3354	0.0168	0.0037	4.133e-06
Pyruvate_ K = 14_ R2 = 3.7% _F = 21.52	rs7941871	T	G	0.8353	-0.024	0.005	1.562e-06
Pyruvate_ K = 14_ R2 = 3.7% _F = 21.52	rs1305261	A	G	0.9846	0.1578	0.0348	5.854e-06
Uridine Number of SNPs: 24 Variation explained (R2): 6.5% F statistic: 22.41	rs10916827	A	G	0.3592	0.0082	0.0017	1.062e-06
Uridine_ K = 24_ R2 = 6.5% _F = 22.41	rs11606746	A	G	0.8779	0.0083	0.0019	9.105e-06
Uridine_ K = 24_ R2 = 6.5% _F = 22.41	rs12580704	T	C	0.1328	0.0085	0.0018	4.553e-06
Uridine_ K = 24_ R2 = 6.5% _F = 22.41	rs940923	A	G	0.0738	-0.0121	0.0027	4.853e-06
Uridine_ K = 24_ R2 = 6.5% _F = 22.41	rs12524738	A	G	0.069	0.0156	0.0035	6.931e-06
Uridine_ K = 24_ R2 = 6.5% _F = 22.41	rs1482929	T	C	0.7927	0.0081	0.0018	4.486e-06
Uridine_ K = 24_ R2 = 6.5% _F = 22.41	rs7593385	A	C	0.9685	0.0359	0.008	6.873e-06
Uridine_ K = 24_ R2 = 6.5% _F = 22.41	rs2825030	T	C	0.8651	-0.0085	0.0019	6.4e-06
Uridine_ K = 24_ R2 = 6.5% _F = 22.41	rs4937481	T	C	0.0384	0.0212	0.0046	4.453e-06
Uridine_ K = 24_ R2 = 6.5% _F = 22.41	rs1952008	A	G	0.8149	0.0081	0.0018	5.828e-06
Uridine_ K = 24_ R2 = 6.5% _F = 22.41	rs11705028	A	G	0.0859	-0.0206	0.0046	8.848e-06
Uridine_ K = 24_ R2 = 6.5% _F = 22.41	rs1152991	T	C	0.5634	-0.0082	0.0017	1.096e-06
Uridine_ K = 24_ R2 = 6.5% _F = 22.41	rs4286846	C	G	0.7232	0.0083	0.0017	1.263e-06
Uridine_ K = 24_ R2 = 6.5% _F = 22.41	rs787496	A	G	0.1702	0.0081	0.0018	5.979e-06
Uridine_ K = 24_ R2 = 6.5% _F = 22.41	rs7338880	A	T	0.169	0.0081	0.0018	6.002e-06
Uridine_ K = 24_ R2 = 6.5% _F = 22.41	rs6988242	T	G	0.769	0.0094	0.0018	1.308e-07
Uridine_ K = 24_ R2 = 6.5% _F = 22.41	rs131748	A	G	0.5957	-0.0079	0.0017	3.793e-06
Uridine_ K = 24_ R2 = 6.5% _F = 22.41	rs10793379	A	G	0.8797	-0.0091	0.0018	7.014e-07
Uridine_ K = 24_ R2 = 6.5% _F = 22.41	rs2686803	T	C	0.5437	-0.0081	0.0017	1.285e-06
Uridine_ K = 24_ R2 = 6.5% _F = 22.41	rs152117	A	G	0.1232	-0.0084	0.0018	5.111e-06
Uridine_ K = 24_ R2 = 6.5% _F = 22.41	rs4130215	A	C	0.1094	-0.0117	0.0026	5.171e-06
Uridine_ K = 24_ R2 = 6.5% _F = 22.41	rs2904665	A	G	0.861	-0.0089	0.0018	9.187e-07
Uridine_ K = 24_ R2 = 6.5% _F = 22.41	rs470119	T	C	0.3904	0.0081	0.0017	1.547e-06
Uridine_ K = 24_ R2 = 6.5% _F = 22.41	rs1426561	T	G	0.8373	-0.0083	0.0018	3.28e-06
Linoleate (18:2N6) Number of SNPs: 17 Variation explained (R2): 4.6% F statistic: 22.24	rs6075489	A	G	0.7177	0.0113	0.0025	9.513e-06
Linoleate (18:2N6)_ K = 17_ R2 = 4.6% _F = 22.24	rs7014120	A	G	0.1341	0.0148	0.0033	5.666e-06
Linoleate (18:2N6)_ K = 17_ R2 = 4.6% _F = 22.24	rs4654501	A	G	0.7671	0.0111	0.0025	9.227e-06
Linoleate (18:2N6)_ K = 17_ R2 = 4.6% _F = 22.24	rs12238083	T	C	0.1389	0.0152	0.0033	3.008e-06
Linoleate (18:2N6)_ K = 17_ R2 = 4.6% _F = 22.24	rs16911296	A	G	0.0771	-0.0209	0.0045	4.18e-06
Linoleate (18:2N6)_ K = 17_ R2 = 4.6% _F = 22.24	rs1348656	T	C	0.7978	-0.0156	0.0031	4.225e-07
Linoleate (18:2N6)_ K = 17_ R2 = 4.6% _F = 22.24	rs12336893	T	G	0.9588	0.0289	0.0062	2.677e-06
Linoleate (18:2N6)_ K = 17_ R2 = 4.6% _F = 22.24	rs1956159	A	G	0.6895	-0.0109	0.0024	7.794e-06
Linoleate (18:2N6)_ K = 17_ R2 = 4.6% _F = 22.24	rs17087487	A	G	0.053	-0.0231	0.0052	7.997e-06
Linoleate (18:2N6)_ K = 17_ R2 = 4.6% _F = 22.24	rs884597	A	T	0.5696	-0.0106	0.0024	8.202e-06
Linoleate (18:2N6)_ K = 17_ R2 = 4.6% _F = 22.24	rs7115681	T	C	0.4668	-0.0131	0.0024	8.293e-08
Linoleate (18:2N6)_ K = 17_ R2 = 4.6% _F = 22.24	rs2242415	A	C	0.6233	0.0109	0.0024	8.242e-06
Linoleate (18:2N6)_ K = 17_ R2 = 4.6% _F = 22.24	rs7898173	A	G	0.1419	-0.0143	0.0032	6.806e-06
Linoleate (18:2N6)_ K = 17_ R2 = 4.6% _F = 22.24	rs13280152	T	G	0.1202	0.0162	0.0033	1.224e-06
Linoleate (18:2N6)_ K = 17_ R2 = 4.6% _F = 22.24	rs2158555	C	G	0.0331	-0.0337	0.0075	7.905e-06
Linoleate (18:2N6)_ K = 17_ R2 = 4.6% _F = 22.24	rs4527065	T	C	0.7327	0.0117	0.0025	2.572e-06
Linoleate (18:2N6)_ K = 17_ R2 = 4.6% _F = 22.24	rs1477025	T	C	0.6545	0.0109	0.0024	7.625e-06
Linoleate (18:2N6)_ K = 17_ R2 = 4.6% _F = 22.24	rs13225022	A	G	0.6784	-0.0123	0.0026	1.402e-06
Allantoin Number of SNPs: 19 Variation explained (R2): 5.1% F statistic: 21.98	rs972709	A	C	0.6548	0.0483	0.0107	6.73e-06
Allantoin_ K = 19_ R2 = 5.1% _F = 21.98	rs2549842	T	C	0.786	-0.0206	0.0046	8.675e-06
Allantoin_ K = 19_ R2 = 5.1% _F = 21.98	rs8108144	T	G	0.788	-0.0232	0.0047	6.444e-07
Allantoin_ K = 19_ R2 = 5.1% _F = 21.98	rs4579742	A	T	0.1251	0.029	0.0064	5.16e-06
Allantoin_ K = 19_ R2 = 5.1% _F = 21.98	rs35352	A	G	0.5735	0.0167	0.0038	8.905e-06
Allantoin_ K = 19_ R2 = 5.1% _F = 21.98	rs11147404	T	G	0.8872	0.0282	0.0063	8.687e-06
Allantoin_ K = 19_ R2 = 5.1% _F = 21.98	rs13257578	C	G	0.2511	-0.0246	0.0054	5.829e-06
Allantoin_ K = 19_ R2 = 5.1% _F = 21.98	rs1431793	A	C	0.7526	-0.0216	0.0046	2.901e-06
Allantoin_ K = 19_ R2 = 5.1% _F = 21.98	rs13217476	T	C	0.7424	0.0203	0.0046	9.835e-06
Allantoin_ K = 19_ R2 = 5.1% _F = 21.98	rs1799412	C	G	0.8394	-0.0262	0.0055	2.28e-06
Allantoin_ K = 19_ R2 = 5.1% _F = 21.98	rs8184921	T	C	0.5087	0.0165	0.0037	9.801e-06
Allantoin_ K = 19_ R2 = 5.1% _F = 21.98	rs1499094	T	G	0.7686	0.0208	0.0046	7.676e-06
Allantoin_ K = 19_ R2 = 5.1% _F = 21.98	rs7959386	A	G	0.7826	0.0237	0.0046	2.888e-07
Allantoin_ K = 19_ R2 = 5.1% _F = 21.98	rs300480	A	C	0.7819	-0.0206	0.0046	8.225e-06
Allantoin_ K = 19_ R2 = 5.1% _F = 21.98	rs12718598	T	C	0.5178	0.018	0.0037	1.491e-06
Allantoin_ K = 19_ R2 = 5.1% _F = 21.98	rs9834988	T	C	0.5297	0.0185	0.0038	7.983e-07
Allantoin_ K = 19_ R2 = 5.1% _F = 21.98	rs2293319	T	C	0.7852	-0.0219	0.0047	3.591e-06
Allantoin_ K = 19_ R2 = 5.1% _F = 21.98	rs1881939	T	C	0.9551	0.1057	0.0237	8.436e-06
Allantoin_ K = 19_ R2 = 5.1% _F = 21.98	rs12126346	C	G	0.0251	-0.0615	0.013	2.087e-06
Arachidonate (20:4N6) Number of SNPs: 27 Variation explained (R2): 7.7% F statistic: 23.94	rs2727261	T	C	0.09	-0.0189	0.0037	3.437e-07
Arachidonate (20:4N6)_ K = 27_ R2 = 7.7% _F = 23.94	rs12352829	A	G	0.1506	-0.0134	0.0027	5.843e-07
Arachidonate (20:4N6)_ K = 27_ R2 = 7.7% _F = 23.94	rs9679675	A	C	0.4732	0.0092	0.0018	4.167e-07
Arachidonate (20:4N6)_ K = 27_ R2 = 7.7% _F = 23.94	rs7939710	A	T	0.4737	-0.0081	0.0018	7.039e-06
Arachidonate (20:4N6)_ K = 27_ R2 = 7.7% _F = 23.94	rs741886	T	G	0.0829	-0.0187	0.0036	1.848e-07
Arachidonate (20:4N6)_ K = 27_ R2 = 7.7% _F = 23.94	rs180022	T	C	0.8328	0.0117	0.0026	9.431e-06
Arachidonate (20:4N6)_ K = 27_ R2 = 7.7% _F = 23.94	rs7394871	A	C	0.0333	-0.039	0.0066	3.382e-09
Arachidonate (20:4N6)_ K = 27_ R2 = 7.7% _F = 23.94	rs3798211	A	C	0.4247	-0.0083	0.0018	4.584e-06
Arachidonate (20:4N6)_ K = 27_ R2 = 7.7% _F = 23.94	rs2235093	A	G	0.469	0.0107	0.0019	1.356e-08
Arachidonate (20:4N6)_ K = 27_ R2 = 7.7% _F = 23.94	rs6535974	A	G	0.8465	-0.0122	0.0027	5.801e-06
Arachidonate (20:4N6)_ K = 27_ R2 = 7.7% _F = 23.94	rs7551263	T	C	0.8377	-0.0119	0.0027	9.322e-06
Arachidonate (20:4N6)_ K = 27_ R2 = 7.7% _F = 23.94	rs198476	A	G	0.482	0.0122	0.0024	5.135e-07
Arachidonate (20:4N6)_ K = 27_ R2 = 7.7% _F = 23.94	rs11837423	A	G	0.088	0.0385	0.008	1.519e-06
Arachidonate (20:4N6)_ K = 27_ R2 = 7.7% _F = 23.94	rs7169869	A	G	0.5404	-0.0194	0.0043	6.586e-06
Arachidonate (20:4N6)_ K = 27_ R2 = 7.7% _F = 23.94	rs1010069	A	G	0.4623	0.0081	0.0018	8.583e-06
Arachidonate (20:4N6)_ K = 27_ R2 = 7.7% _F = 23.94	rs433	A	G	0.4362	0.0089	0.0018	1.232e-06
Arachidonate (20:4N6)_ K = 27_ R2 = 7.7% _F = 23.94	rs7992190	A	G	0.5226	0.0084	0.0018	3.851e-06
Arachidonate (20:4N6)_ K = 27_ R2 = 7.7% _F = 23.94	rs1800009	T	C	0.6444	0.0125	0.0025	4.914e-07
Arachidonate (20:4N6)_ K = 27_ R2 = 7.7% _F = 23.94	rs10514491	T	C	0.6782	0.012	0.0026	2.859e-06
Arachidonate (20:4N6)_ K = 27_ R2 = 7.7% _F = 23.94	rs1430209	T	C	0.5313	-0.0086	0.0018	1.865e-06
Arachidonate (20:4N6)_ K = 27_ R2 = 7.7% _F = 23.94	rs8123073	A	G	0.983	-0.0372	0.0082	5.942e-06
Arachidonate (20:4N6)_ K = 27_ R2 = 7.7% _F = 23.94	rs712916	T	C	0.9875	-0.0456	0.0102	8.193e-06
Arachidonate (20:4N6)_ K = 27_ R2 = 7.7% _F = 23.94	rs532098	A	G	0.461	0.009	0.002	6.795e-06
Arachidonate (20:4N6)_ K = 27_ R2 = 7.7% _F = 23.94	rs12532113	T	C	0.961	-0.028	0.006	3.061e-06
Arachidonate (20:4N6)_ K = 27_ R2 = 7.7% _F = 23.94	rs4739402	T	C	0.5172	-0.0085	0.0019	5.614e-06
Arachidonate (20:4N6)_ K = 27_ R2 = 7.7% _F = 23.94	rs6999018	C	G	0.4691	-0.0083	0.0018	4.398e-06
Arachidonate (20:4N6)_ K = 27_ R2 = 7.7% _F = 23.94	rs6573402	A	G	0.8268	-0.0119	0.0027	7.922e-06
Arachidonate (20:4N6)_ K = 27_ R2 = 7.7% _F = 23.94	rs6568389	T	C	0.8061	0.0157	0.0033	2.164e-06
Arachidonate (20:4N6)_ K = 27_ R2 = 7.7% _F = 23.94	rs4982495	T	C	0.4275	-0.0084	0.0018	3.272e-06
Deoxycholate Number of SNPs: 17 Variation explained (R2): 4.4% F statistic: 21.15	rs7833904	A	T	0.4051	-0.0316	0.0066	1.645e-06
Deoxycholate_ K = 17_ R2 = 4.4% _F = 21.15	rs17175231	A	G	0.9348	0.0593	0.0125	1.986e-06
Deoxycholate_ K = 17_ R2 = 4.4% _F = 21.15	rs7427777	A	C	0.0483	0.1291	0.0286	6.361e-06
Deoxycholate_ K = 17_ R2 = 4.4% _F = 21.15	rs10236740	C	G	0.6866	-0.0332	0.0073	4.968e-06
Deoxycholate_ K = 17_ R2 = 4.4% _F = 21.15	rs3752241	C	G	0.8684	0.0574	0.0126	5.523e-06
Deoxycholate_ K = 17_ R2 = 4.4% _F = 21.15	rs13227473	T	C	0.8824	0.0456	0.0103	9.374e-06
Deoxycholate_ K = 17_ R2 = 4.4% _F = 21.15	rs2002212	A	G	0.049	-0.0691	0.0155	7.817e-06
Deoxycholate_ K = 17_ R2 = 4.4% _F = 21.15	rs17131011	A	G	0.0404	-0.0781	0.0174	6.882e-06
Deoxycholate_ K = 17_ R2 = 4.4% _F = 21.15	rs17641342	C	G	0.1639	0.0725	0.0159	5.262e-06
Deoxycholate_ K = 17_ R2 = 4.4% _F = 21.15	rs12405017	T	C	0.9817	-0.1891	0.0426	9.175e-06
Deoxycholate_ K = 17_ R2 = 4.4% _F = 21.15	rs7269193	A	G	0.9092	-0.0528	0.0116	5.034e-06
Deoxycholate_ K = 17_ R2 = 4.4% _F = 21.15	rs9851393	A	G	0.5199	0.0297	0.0066	7.383e-06
Deoxycholate_ K = 17_ R2 = 4.4% _F = 21.15	rs10134653	T	C	0.3144	0.0361	0.0077	2.526e-06
Deoxycholate_ K = 17_ R2 = 4.4% _F = 21.15	rs7262824	T	C	0.2062	0.0357	0.008	8.697e-06
Deoxycholate_ K = 17_ R2 = 4.4% _F = 21.15	rs4579412	A	C	0.1469	-0.0414	0.0091	4.771e-06
Deoxycholate_ K = 17_ R2 = 4.4% _F = 21.15	rs102940	A	G	0.8139	0.0406	0.0088	4.023e-06
Deoxycholate_ K = 17_ R2 = 4.4% _F = 21.15	rs4244808	T	G	0.5307	0.0305	0.0068	8.3e-06
Margarate (17:0) Number of SNPs: 9 Variation explained (R2): 2.5% F statistic: 22.5	rs11118120	A	C	0.8501	-0.019	0.004	1.965e-06
Margarate (17:0)_ K = 9_ R2 = 2.5% _F = 22.5	rs17392530	A	G	0.9634	0.0335	0.0075	7.644e-06
Margarate (17:0)_ K = 9_ R2 = 2.5% _F = 22.5	rs1348656	T	C	0.7973	-0.0194	0.0038	3.436e-07
Margarate (17:0)_ K = 9_ R2 = 2.5% _F = 22.5	rs7583745	T	C	0.884	-0.0348	0.0075	3.062e-06
Margarate (17:0)_ K = 9_ R2 = 2.5% _F = 22.5	rs17351329	A	G	0.8651	-0.0185	0.0041	5.372e-06
Margarate (17:0)_ K = 9_ R2 = 2.5% _F = 22.5	rs10517425	T	G	0.1713	-0.0173	0.0038	7.216e-06
Margarate (17:0)_ K = 9_ R2 = 2.5% _F = 22.5	rs1993110	A	G	0.837	-0.0208	0.0039	1.303e-07
Margarate (17:0)_ K = 9_ R2 = 2.5% _F = 22.5	rs2305384	A	G	0.3991	-0.0138	0.0031	6.684e-06
Margarate (17:0)_ K = 9_ R2 = 2.5% _F = 22.5	rs4470674	A	T	0.7182	-0.0141	0.0031	6.639e-06
Inosine Number of SNPs: 10 Variation explained (R2): 3% F statistic: 24.22	rs7297956	C	G	0.7301	0.0597	0.0134	7.69e-06
Inosine_ K = 10_ R2 = 3% _F = 24.22	rs9362211	A	G	0.8459	-0.0955	0.0142	1.517e-11
Inosine_ K = 10_ R2 = 3% _F = 24.22	rs4384764	A	G	0.2371	-0.0568	0.0127	7.902e-06
Inosine_ K = 10_ R2 = 3% _F = 24.22	rs7795118	T	C	0.2305	0.0905	0.0186	1.211e-06
Inosine_ K = 10_ R2 = 3% _F = 24.22	rs11619892	T	C	0.0559	0.1065	0.0237	7.094e-06
Inosine_ K = 10_ R2 = 3% _F = 24.22	rs9450325	T	C	0.5671	0.0495	0.0105	2.411e-06
Inosine_ K = 10_ R2 = 3% _F = 24.22	rs2845674	A	T	0.4558	0.0471	0.0105	7.07e-06
Inosine_ K = 10_ R2 = 3% _F = 24.22	rs10489	A	C	0.0243	0.1743	0.038	4.601e-06
Inosine_ K = 10_ R2 = 3% _F = 24.22	rs17741813	T	C	0.015	0.538	0.1192	6.389e-06
Inosine_ K = 10_ R2 = 3% _F = 24.22	rs3770129	T	C	0.0892	0.0964	0.0205	2.46e-06
Inosine_ K = 10_ R2 = 3% _F = 24.22	rs17077586	A	G	0.9187	0.1032	0.021	9.198e-07
Isoleucine Number of SNPs: 17 Variation explained (R2): 4.5% F statistic: 21.5	rs161503	T	C	0.1176	0.008	0.0018	6.867e-06
Isoleucine_ K = 17_ R2 = 4.5% _F = 21.5	rs12707434	A	G	0.9639	-0.0366	0.008	4.647e-06
Isoleucine_ K = 17_ R2 = 4.5% _F = 21.5	rs7340968	A	C	0.027	0.0333	0.0075	9.053e-06
Isoleucine_ K = 17_ R2 = 4.5% _F = 21.5	rs7530270	A	C	0.2	-0.0085	0.0018	1.509e-06
Isoleucine_ K = 17_ R2 = 4.5% _F = 21.5	rs2397972	A	G	0.054	0.012	0.0026	4.045e-06
Isoleucine_ K = 17_ R2 = 4.5% _F = 21.5	rs4325745	T	C	0.596	-0.009	0.002	6.795e-06
Isoleucine_ K = 17_ R2 = 4.5% _F = 21.5	rs6084839	A	C	0.9446	-0.0123	0.0027	3.994e-06
Isoleucine_ K = 17_ R2 = 4.5% _F = 21.5	rs6101153	A	G	0.8897	-0.008	0.0018	8.264e-06
Isoleucine_ K = 17_ R2 = 4.5% _F = 21.5	rs4562384	T	C	0.7166	0.0075	0.0017	5.497e-06
Isoleucine_ K = 17_ R2 = 4.5% _F = 21.5	rs11128879	T	C	0.1208	-0.0078	0.0018	9.564e-06
Isoleucine_ K = 17_ R2 = 4.5% _F = 21.5	rs10063205	T	C	0.1559	0.008	0.0017	4.058e-06
Isoleucine_ K = 17_ R2 = 4.5% _F = 21.5	rs3760605	T	C	0.8912	0.0079	0.0018	9.799e-06
Isoleucine_ K = 17_ R2 = 4.5% _F = 21.5	rs1618996	A	G	0.1298	0.0091	0.0018	3.78e-07
Isoleucine_ K = 17_ R2 = 4.5% _F = 21.5	rs1895999	A	G	0.1699	-0.0151	0.0032	3.434e-06
Isoleucine_ K = 17_ R2 = 4.5% _F = 21.5	rs6841731	A	G	0.52	0.0074	0.0015	1.604e-06
Isoleucine_ K = 17_ R2 = 4.5% _F = 21.5	rs2429155	A	T	0.1144	0.008	0.0018	6.777e-06
Isoleucine_ K = 17_ R2 = 4.5% _F = 21.5	rs4086666	T	G	0.8804	0.0083	0.0018	2.422e-06
Isoleucine_ K = 17_ R2 = 4.5% _F = 21.5	rs503360	A	G	0.8799	0.0081	0.0018	4.785e-06
Threonine Number of SNPs: 20 Variation explained (R2): 5.2% F statistic: 21.51	rs4516857	C	G	0.0991	0.0205	0.0045	4.927e-06
Threonine_ K = 20_ R2 = 5.2% _F = 21.51	rs202490	T	C	0.3533	-0.0111	0.0024	4.452e-06
Threonine_ K = 20_ R2 = 5.2% _F = 21.51	rs1466785	T	C	0.4409	-0.0106	0.0024	5.934e-06
Threonine_ K = 20_ R2 = 5.2% _F = 21.51	rs1026677	C	G	0.9578	0.0257	0.0054	2.176e-06
Threonine_ K = 20_ R2 = 5.2% _F = 21.51	rs780093	T	C	0.3998	-0.0108	0.0024	3.982e-06
Threonine_ K = 20_ R2 = 5.2% _F = 21.51	rs892051	T	C	0.2576	0.011	0.0025	7.667e-06
Threonine_ K = 20_ R2 = 5.2% _F = 21.51	rs4822129	A	G	0.194	0.0122	0.0026	3.757e-06
Threonine_ K = 20_ R2 = 5.2% _F = 21.51	rs7220150	A	C	0.8227	0.0147	0.0033	6.706e-06
Threonine_ K = 20_ R2 = 5.2% _F = 21.51	rs13242474	A	G	0.7395	0.0111	0.0024	5.472e-06
Threonine_ K = 20_ R2 = 5.2% _F = 21.51	rs12235970	A	G	0.0465	-0.0249	0.0054	4.015e-06
Threonine_ K = 20_ R2 = 5.2% _F = 21.51	rs3857856	A	G	0.8885	0.0152	0.0033	4.933e-06
Threonine_ K = 20_ R2 = 5.2% _F = 21.51	rs9403794	A	C	0.5963	0.0175	0.0039	8.093e-06
Threonine_ K = 20_ R2 = 5.2% _F = 21.51	rs17268257	T	C	0.1349	-0.0159	0.0035	7.314e-06
Threonine_ K = 20_ R2 = 5.2% _F = 21.51	rs42041	C	G	0.7449	-0.0109	0.0025	9.332e-06
Threonine_ K = 20_ R2 = 5.2% _F = 21.51	rs10795360	C	G	0.6957	0.0114	0.0025	3.761e-06
Threonine_ K = 20_ R2 = 5.2% _F = 21.51	rs12895778	T	C	0.8653	0.0146	0.0033	9.788e-06
Threonine_ K = 20_ R2 = 5.2% _F = 21.51	rs7302925	A	G	0.1999	0.0153	0.0031	5.851e-07
Threonine_ K = 20_ R2 = 5.2% _F = 21.51	rs10234936	A	G	0.035	0.028	0.0061	4.877e-06
Threonine_ K = 20_ R2 = 5.2% _F = 21.51	rs10798574	T	G	0.2212	-0.0142	0.003	2.029e-06
Threonine_ K = 20_ R2 = 5.2% _F = 21.51	rs715	T	C	0.7125	0.0113	0.0024	4.187e-06
Tyrosine Number of SNPs: 33 Variation explained (R2): 9.1% F statistic: 23.7	rs10033622	T	C	0.6115	0.0126	0.0026	1.346e-06
Tyrosine_ K = 33_ R2 = 9.1% _F = 23.7	rs1536564	T	C	0.2644	0.0075	0.0017	7.048e-06
Tyrosine_ K = 33_ R2 = 9.1% _F = 23.7	rs4347830	A	G	0.337	0.009	0.002	6.795e-06
Tyrosine_ K = 33_ R2 = 9.1% _F = 23.7	rs906466	A	G	0.1846	0.0076	0.0017	8.838e-06
Tyrosine_ K = 33_ R2 = 9.1% _F = 23.7	rs1851740	A	C	0.185	-0.008	0.0017	2.742e-06
Tyrosine_ K = 33_ R2 = 9.1% _F = 23.7	rs13237436	A	G	0.193	-0.0076	0.0017	7.257e-06
Tyrosine_ K = 33_ R2 = 9.1% _F = 23.7	rs1512342	T	C	0.3384	0.0072	0.0016	7.006e-06
Tyrosine_ K = 33_ R2 = 9.1% _F = 23.7	rs7641634	A	G	0.266	-0.0077	0.0016	2.564e-06
Tyrosine_ K = 33_ R2 = 9.1% _F = 23.7	rs4788815	A	T	0.3492	0.0074	0.0016	4.407e-06
Tyrosine_ K = 33_ R2 = 9.1% _F = 23.7	rs12436404	A	G	0.0947	-0.0109	0.0025	8.731e-06
Tyrosine_ K = 33_ R2 = 9.1% _F = 23.7	rs10516469	T	C	0.1	-0.0114	0.0025	5.886e-06
Tyrosine_ K = 33_ R2 = 9.1% _F = 23.7	rs9594421	A	T	0.2757	0.0075	0.0016	4.594e-06
Tyrosine_ K = 33_ R2 = 9.1% _F = 23.7	rs11243929	T	C	0.7731	-0.0076	0.0017	8.328e-06
Tyrosine_ K = 33_ R2 = 9.1% _F = 23.7	rs703014	A	G	0.326	0.0135	0.0027	7.194e-07
Tyrosine_ K = 33_ R2 = 9.1% _F = 23.7	rs4863214	T	C	0.7398	-0.0149	0.0032	3.984e-06
Tyrosine_ K = 33_ R2 = 9.1% _F = 23.7	rs7151615	T	G	0.273	-0.0079	0.0016	1.469e-06
Tyrosine_ K = 33_ R2 = 9.1% _F = 23.7	rs7202340	A	C	0.6332	0.0077	0.0016	2.394e-06
Tyrosine_ K = 33_ R2 = 9.1% _F = 23.7	rs1022092	A	G	0.5538	-0.01	0.0016	2.593e-10
Tyrosine_ K = 33_ R2 = 9.1% _F = 23.7	rs9484927	T	C	0.0164	-0.0284	0.0061	2.986e-06
Tyrosine_ K = 33_ R2 = 9.1% _F = 23.7	rs4808739	T	C	0.7578	0.0083	0.0018	2.421e-06
Tyrosine_ K = 33_ R2 = 9.1% _F = 23.7	rs2879560	T	C	0.2226	-0.0081	0.0017	3.476e-06
Tyrosine_ K = 33_ R2 = 9.1% _F = 23.7	rs1475943	T	C	0.2215	0.0079	0.0017	3.693e-06
Tyrosine_ K = 33_ R2 = 9.1% _F = 23.7	rs8035304	T	G	0.81	0.009	0.002	6.795e-06
Tyrosine_ K = 33_ R2 = 9.1% _F = 23.7	rs12891	C	G	0.4177	0.0078	0.0018	8.777e-06
Tyrosine_ K = 33_ R2 = 9.1% _F = 23.7	rs7834337	A	G	0.0904	-0.0113	0.0025	4.709e-06
Tyrosine_ K = 33_ R2 = 9.1% _F = 23.7	rs9327433	T	G	0.5134	-0.0076	0.0016	2.529e-06
Tyrosine_ K = 33_ R2 = 9.1% _F = 23.7	rs1532775	A	G	0.7796	0.0081	0.0017	1.035e-06
Tyrosine_ K = 33_ R2 = 9.1% _F = 23.7	rs936632	A	C	0.1787	-0.0089	0.0017	2.694e-07
Tyrosine_ K = 33_ R2 = 9.1% _F = 23.7	rs12728678	T	C	0.2003	-0.0096	0.0017	2.189e-08
Tyrosine_ K = 33_ R2 = 9.1% _F = 23.7	rs17293820	T	G	0.8016	0.0081	0.0017	2.011e-06
Tyrosine_ K = 33_ R2 = 9.1% _F = 23.7	rs2891733	T	C	0.8941	-0.0109	0.0024	8.467e-06
Tyrosine_ K = 33_ R2 = 9.1% _F = 23.7	rs8111703	A	T	0.2142	-0.0084	0.0017	1.467e-06
Tyrosine_ K = 33_ R2 = 9.1% _F = 23.7	rs6493	A	G	0.1195	0.0114	0.0024	2.346e-06
Tyrosine_ K = 33_ R2 = 9.1% _F = 23.7	rs7195332	T	C	0.2152	0.0077	0.0017	4.051e-06
Lysine Number of SNPs: 24 Variation explained (R2): 6.5% F statistic: 22.58	rs4413056	T	G	0.245	0.0076	0.0017	8.261e-06
Lysine_ K = 24_ R2 = 6.5% _F = 22.58	rs9943204	T	C	0.141	0.0084	0.0018	2.937e-06
Lysine_ K = 24_ R2 = 6.5% _F = 22.58	rs1169467	T	C	0.92	-0.012	0.0026	3.923e-06
Lysine_ K = 24_ R2 = 6.5% _F = 22.58	rs13302218	A	G	0.932	-0.0118	0.0026	6.799e-06
Lysine_ K = 24_ R2 = 6.5% _F = 22.58	rs10491431	A	C	0.1435	0.0082	0.0018	3.8e-06
Lysine_ K = 24_ R2 = 6.5% _F = 22.58	rs2383208	A	G	0.8223	0.0078	0.0017	8.789e-06
Lysine_ K = 24_ R2 = 6.5% _F = 22.58	rs4785155	T	C	0.8489	-0.008	0.0018	8.766e-06
Lysine_ K = 24_ R2 = 6.5% _F = 22.58	rs1402325	A	G	0.1437	-0.008	0.0018	8.23e-06
Lysine_ K = 24_ R2 = 6.5% _F = 22.58	rs10738383	A	G	0.6175	-0.0131	0.0029	7.385e-06
Lysine_ K = 24_ R2 = 6.5% _F = 22.58	rs7583413	T	C	0.8245	0.0082	0.0017	2.62e-06
Lysine_ K = 24_ R2 = 6.5% _F = 22.58	rs6587731	T	G	0.1626	-0.0093	0.0018	1.963e-07
Lysine_ K = 24_ R2 = 6.5% _F = 22.58	rs1714369	A	G	0.1564	0.0079	0.0018	9.552e-06
Lysine_ K = 24_ R2 = 6.5% _F = 22.58	rs12268257	T	C	0.1339	-0.0082	0.0018	5.591e-06
Lysine_ K = 24_ R2 = 6.5% _F = 22.58	rs10165613	T	C	0.2254	-0.0078	0.0017	6.787e-06
Lysine_ K = 24_ R2 = 6.5% _F = 22.58	rs7572149	T	C	0.133	0.0088	0.0018	1.002e-06
Lysine_ K = 24_ R2 = 6.5% _F = 22.58	rs1968757	A	G	0.5362	0.0086	0.0016	1.025e-07
Lysine_ K = 24_ R2 = 6.5% _F = 22.58	rs11659807	C	G	0.1964	-0.0082	0.0017	2.155e-06
Lysine_ K = 24_ R2 = 6.5% _F = 22.58	rs10850904	T	C	0.127	0.0085	0.0018	2.738e-06
Lysine_ K = 24_ R2 = 6.5% _F = 22.58	rs4317453	A	G	0.3363	-0.0077	0.0017	9.116e-06
Lysine_ K = 24_ R2 = 6.5% _F = 22.58	rs1450295	T	C	0.8613	0.0083	0.0018	4.287e-06
Lysine_ K = 24_ R2 = 6.5% _F = 22.58	rs11600689	A	T	0.1616	-0.0103	0.0023	9.136e-06
Lysine_ K = 24_ R2 = 6.5% _F = 22.58	rs1894947	T	C	0.1801	0.0083	0.0017	1.847e-06
Lysine_ K = 24_ R2 = 6.5% _F = 22.58	rs9642758	A	G	0.1578	0.0086	0.0018	1.282e-06
Lysine_ K = 24_ R2 = 6.5% _F = 22.58	rs3024536	T	C	0.1443	-0.0085	0.0018	1.69e-06
Methionine Number of SNPs: 22 Variation explained (R2): 5.7% F statistic: 21.45	rs6766715	A	G	0.128	-0.009	0.002	6.795e-06
Methionine_ K = 22_ R2 = 5.7% _F = 21.45	rs1742639	A	G	0.8865	0.0077	0.0017	7.939e-06
Methionine_ K = 22_ R2 = 5.7% _F = 21.45	rs6065221	T	C	0.1482	-0.0073	0.0016	7.504e-06
Methionine_ K = 22_ R2 = 5.7% _F = 21.45	rs7570141	A	G	0.104	-0.0119	0.0026	6.212e-06
Methionine_ K = 22_ R2 = 5.7% _F = 21.45	rs8135519	C	G	0.1742	0.0077	0.0017	4.846e-06
Methionine_ K = 22_ R2 = 5.7% _F = 21.45	rs1015960	A	T	0.4572	-0.0062	0.0014	9.955e-06
Methionine_ K = 22_ R2 = 5.7% _F = 21.45	rs6960830	T	C	0.8851	0.0078	0.0017	4.158e-06
Methionine_ K = 22_ R2 = 5.7% _F = 21.45	rs2418886	A	G	0.0489	0.0223	0.0047	1.63e-06
Methionine_ K = 22_ R2 = 5.7% _F = 21.45	rs885076	A	G	0.8716	-0.0074	0.0017	8.747e-06
Methionine_ K = 22_ R2 = 5.7% _F = 21.45	rs2066415	T	C	0.3567	0.0065	0.0015	8.628e-06
Methionine_ K = 22_ R2 = 5.7% _F = 21.45	rs3740996	A	G	0.1208	0.0078	0.0017	4.33e-06
Methionine_ K = 22_ R2 = 5.7% _F = 21.45	rs2780242	T	C	0.1138	-0.0083	0.0018	3.849e-06
Methionine_ K = 22_ R2 = 5.7% _F = 21.45	rs4693555	T	C	0.2131	-0.0069	0.0016	8.434e-06
Methionine_ K = 22_ R2 = 5.7% _F = 21.45	rs10055021	A	G	0.958	-0.0154	0.0034	5.064e-06
Methionine_ K = 22_ R2 = 5.7% _F = 21.45	rs11760350	A	G	0.1238	-0.0075	0.0017	7.77e-06
Methionine_ K = 22_ R2 = 5.7% _F = 21.45	rs6533609	T	C	0.1429	-0.0077	0.0017	3.776e-06
Methionine_ K = 22_ R2 = 5.7% _F = 21.45	rs17478241	T	C	0.168	-0.0076	0.0016	2.751e-06
Methionine_ K = 22_ R2 = 5.7% _F = 21.45	rs487946	T	G	0.8292	-0.0074	0.0016	3.096e-06
Methionine_ K = 22_ R2 = 5.7% _F = 21.45	rs9598454	A	G	0.8961	0.0079	0.0017	5.538e-06
Methionine_ K = 22_ R2 = 5.7% _F = 21.45	rs16839317	T	C	0.8726	-0.0078	0.0017	2.753e-06
Methionine_ K = 22_ R2 = 5.7% _F = 21.45	rs9410970	A	C	0.2201	-0.0068	0.0015	5.493e-06
Methionine_ K = 22_ R2 = 5.7% _F = 21.45	rs320480	A	C	0.8633	-0.0079	0.0017	3.841e-06
Methionine_ K = 22_ R2 = 5.7% _F = 21.45	rs11232103	A	C	0.1151	0.0085	0.0017	3.697e-07
Malate Number of SNPs: 16 Variation explained (R2): 4.5% F statistic: 22.95	rs690191	T	C	0.7821	-0.0121	0.0027	9.234e-06
Malate_ K = 16_ R2 = 4.5% _F = 22.95	rs8073225	T	C	0.7657	-0.013	0.0028	3.938e-06
Malate_ K = 16_ R2 = 4.5% _F = 22.95	rs1939471	A	G	0.7209	-0.0123	0.0027	4.063e-06
Malate_ K = 16_ R2 = 4.5% _F = 22.95	rs1244495	T	G	0.5959	-0.0116	0.0026	9.845e-06
Malate_ K = 16_ R2 = 4.5% _F = 22.95	rs726900	T	G	0.8497	0.0173	0.0036	1.592e-06
Malate_ K = 16_ R2 = 4.5% _F = 22.95	rs9600408	T	C	0.018	-0.1036	0.022	2.58e-06
Malate_ K = 16_ R2 = 4.5% _F = 22.95	rs9471841	T	C	0.0526	-0.0275	0.0062	9.844e-06
Malate_ K = 16_ R2 = 4.5% _F = 22.95	rs2670625	T	C	0.7217	-0.0123	0.0027	4.12e-06
Malate_ K = 16_ R2 = 4.5% _F = 22.95	rs7010256	C	G	0.0158	0.1003	0.0224	7.575e-06
Malate_ K = 16_ R2 = 4.5% _F = 22.95	rs912170	A	G	0.8773	-0.0186	0.0036	2.089e-07
Malate_ K = 16_ R2 = 4.5% _F = 22.95	rs6502055	T	G	0.5696	0.0143	0.0026	5.786e-08
Malate_ K = 16_ R2 = 4.5% _F = 22.95	rs10990303	T	C	0.2309	-0.0129	0.0028	3.938e-06
Malate_ K = 16_ R2 = 4.5% _F = 22.95	rs12713120	T	C	0.7564	0.0122	0.0027	6.742e-06
Malate_ K = 16_ R2 = 4.5% _F = 22.95	rs26735	A	G	0.3531	0.0126	0.0026	2.118e-06
Malate_ K = 16_ R2 = 4.5% _F = 22.95	rs4768795	T	G	0.3587	0.0195	0.0043	6.189e-06
Malate_ K = 16_ R2 = 4.5% _F = 22.95	rs2288867	T	C	0.2334	-0.0132	0.0027	1.018e-06
Malate_ K = 16_ R2 = 4.5% _F = 22.95	rs1996458	A	T	0.6842	0.012	0.0027	6.598e-06
Malate_ K = 16_ R2 = 4.5% _F = 22.95	rs10899384	A	G	0.3819	0.0139	0.0026	1.27e-07
Palmitate (16:0) Number of SNPs: 29 Variation explained (R2): 7.7% F statistic: 22.48	rs986779	A	G	0.5475	-0.0075	0.0017	9.025e-06
Palmitate (16:0)_ K = 29_ R2 = 7.7% _F = 22.48	rs11118120	A	C	0.8495	-0.0137	0.0029	3.158e-06
Palmitate (16:0)_ K = 29_ R2 = 7.7% _F = 22.48	rs11222474	T	G	0.6036	-0.0082	0.0017	1.42e-06
Palmitate (16:0)_ K = 29_ R2 = 7.7% _F = 22.48	rs10199787	T	C	0.6173	0.0077	0.0017	6.198e-06
Palmitate (16:0)_ K = 29_ R2 = 7.7% _F = 22.48	rs17392530	A	G	0.9634	0.0225	0.0049	5.255e-06
Palmitate (16:0)_ K = 29_ R2 = 7.7% _F = 22.48	rs13355979	A	G	0.5663	-0.0078	0.0017	3.942e-06
Palmitate (16:0)_ K = 29_ R2 = 7.7% _F = 22.48	rs4408	A	G	0.1844	0.0107	0.0024	9.964e-06
Palmitate (16:0)_ K = 29_ R2 = 7.7% _F = 22.48	rs12360462	A	G	0.5963	0.008	0.0017	2.228e-06
Palmitate (16:0)_ K = 29_ R2 = 7.7% _F = 22.48	rs1348656	T	C	0.798	-0.0117	0.0024	9.069e-07
Palmitate (16:0)_ K = 29_ R2 = 7.7% _F = 22.48	rs12339515	A	C	0.9627	0.0223	0.0049	5.952e-06
Palmitate (16:0)_ K = 29_ R2 = 7.7% _F = 22.48	rs12147529	A	G	0.4485	0.0078	0.0017	5.917e-06
Palmitate (16:0)_ K = 29_ R2 = 7.7% _F = 22.48	rs11720202	C	G	0.5509	0.008	0.0017	2.75e-06
Palmitate (16:0)_ K = 29_ R2 = 7.7% _F = 22.48	rs7565567	A	C	0.982	-0.042	0.009	3.061e-06
Palmitate (16:0)_ K = 29_ R2 = 7.7% _F = 22.48	rs9809122	A	G	0.5296	-0.008	0.0017	2.445e-06
Palmitate (16:0)_ K = 29_ R2 = 7.7% _F = 22.48	rs11133892	A	G	0.4427	0.0089	0.0017	1.559e-07
Palmitate (16:0)_ K = 29_ R2 = 7.7% _F = 22.48	rs10004910	A	G	0.5632	0.0085	0.0017	5.383e-07
Palmitate (16:0)_ K = 29_ R2 = 7.7% _F = 22.48	rs4420815	A	G	0.143	-0.015	0.003	5.733e-07
Palmitate (16:0)_ K = 29_ R2 = 7.7% _F = 22.48	rs6540294	A	C	0.451	-0.008	0.0017	2.872e-06
Palmitate (16:0)_ K = 29_ R2 = 7.7% _F = 22.48	rs802993	A	G	0.0685	-0.0278	0.0063	9.106e-06
Palmitate (16:0)_ K = 29_ R2 = 7.7% _F = 22.48	rs7190489	T	C	0.3841	0.0078	0.0018	8.948e-06
Palmitate (16:0)_ K = 29_ R2 = 7.7% _F = 22.48	rs11193635	T	C	0.6724	0.0087	0.0018	7.342e-07
Palmitate (16:0)_ K = 29_ R2 = 7.7% _F = 22.48	rs6453594	A	G	0.2196	-0.0106	0.0024	9.305e-06
Palmitate (16:0)_ K = 29_ R2 = 7.7% _F = 22.48	rs577266	A	C	0.637	-0.009	0.002	6.795e-06
Palmitate (16:0)_ K = 29_ R2 = 7.7% _F = 22.48	rs16882365	A	T	0.0779	0.0152	0.0033	4.634e-06
Palmitate (16:0)_ K = 29_ R2 = 7.7% _F = 22.48	rs4470674	A	T	0.7184	-0.0106	0.0022	2.019e-06
Palmitate (16:0)_ K = 29_ R2 = 7.7% _F = 22.48	rs1480309	T	C	0.3482	-0.0077	0.0017	5.623e-06
Palmitate (16:0)_ K = 29_ R2 = 7.7% _F = 22.48	rs7710595	A	C	0.548	0.0083	0.0018	3.148e-06
Palmitate (16:0)_ K = 29_ R2 = 7.7% _F = 22.48	rs10242171	A	G	0.1355	-0.0121	0.0026	3.727e-06
Palmitate (16:0)_ K = 29_ R2 = 7.7% _F = 22.48	rs10084655	A	G	0.4191	-0.0077	0.0017	4.695e-06
Palmitate (16:0)_ K = 29_ R2 = 7.7% _F = 22.48	rs942888	A	G	0.4776	-0.0076	0.0017	6.292e-06
Nonadecanoate (19:0) Number of SNPs: 16 Variation explained (R2): 4.4% F statistic: 22.32	rs6486528	C	G	0.9236	0.0228	0.0049	3.302e-06
Nonadecanoate (19:0)_ K = 16_ R2 = 4.4% _F = 22.32	rs9291034	T	C	0.4068	-0.0117	0.0026	5.416e-06
Nonadecanoate (19:0)_ K = 16_ R2 = 4.4% _F = 22.32	rs7322343	A	C	0.0391	-0.0523	0.0115	5.206e-06
Nonadecanoate (19:0)_ K = 16_ R2 = 4.4% _F = 22.32	rs4472784	T	C	0.3048	-0.0118	0.0026	4.782e-06
Nonadecanoate (19:0)_ K = 16_ R2 = 4.4% _F = 22.32	rs11674467	T	C	0.4181	0.0148	0.003	7.005e-07
Nonadecanoate (19:0)_ K = 16_ R2 = 4.4% _F = 22.32	rs1801838	T	C	0.9655	-0.0469	0.0105	8.513e-06
Nonadecanoate (19:0)_ K = 16_ R2 = 4.4% _F = 22.32	rs17081305	T	C	0.9657	0.031	0.0067	4.068e-06
Nonadecanoate (19:0)_ K = 16_ R2 = 4.4% _F = 22.32	rs11828531	A	G	0.9788	-0.072	0.0161	7.732e-06
Nonadecanoate (19:0)_ K = 16_ R2 = 4.4% _F = 22.32	rs603424	A	G	0.1833	0.0182	0.0032	2.229e-08
Nonadecanoate (19:0)_ K = 16_ R2 = 4.4% _F = 22.32	rs10156335	A	G	0.8473	-0.0153	0.0034	7.174e-06
Nonadecanoate (19:0)_ K = 16_ R2 = 4.4% _F = 22.32	rs11780703	T	C	0.7557	-0.0127	0.0026	9.892e-07
Nonadecanoate (19:0)_ K = 16_ R2 = 4.4% _F = 22.32	rs281216	T	G	0.9184	0.0205	0.0043	1.704e-06
Nonadecanoate (19:0)_ K = 16_ R2 = 4.4% _F = 22.32	rs17066836	C	G	0.0202	-0.0707	0.0157	6.243e-06
Nonadecanoate (19:0)_ K = 16_ R2 = 4.4% _F = 22.32	rs12862123	C	G	0.4723	-0.0119	0.0025	2.618e-06
Nonadecanoate (19:0)_ K = 16_ R2 = 4.4% _F = 22.32	rs11118895	T	C	0.4675	0.0202	0.0045	7.155e-06
Nonadecanoate (19:0)_ K = 16_ R2 = 4.4% _F = 22.32	rs17511568	T	C	0.8423	0.0152	0.0033	5.26e-06
Nonadecanoate (19:0)_ K = 16_ R2 = 4.4% _F = 22.32	rs1483739	A	C	0.2369	0.0117	0.0026	9.507e-06
Stearate (18:0) Number of SNPs: 44 Variation explained (R2): 11.6% F statistic: 23.22	rs11118120	A	C	0.8531	-0.0121	0.0025	1.176e-06
Stearate (18:0)_ K = 44_ R2 = 11.6% _F = 23.22	rs1922419	A	G	0.7807	-0.0182	0.0039	3.365e-06
Stearate (18:0)_ K = 44_ R2 = 11.6% _F = 23.22	rs3087751	A	C	0.423	0.0078	0.0017	5.234e-06
Stearate (18:0)_ K = 44_ R2 = 11.6% _F = 23.22	rs635548	T	C	0.5177	0.0075	0.0017	9.008e-06
Stearate (18:0)_ K = 44_ R2 = 11.6% _F = 23.22	rs4507103	A	G	0.397	0.0077	0.0017	6.893e-06
Stearate (18:0)_ K = 44_ R2 = 11.6% _F = 23.22	rs13355979	A	G	0.5665	-0.0076	0.0017	6.232e-06
Stearate (18:0)_ K = 44_ R2 = 11.6% _F = 23.22	rs4750059	C	G	0.7956	-0.0134	0.003	6.492e-06
Stearate (18:0)_ K = 44_ R2 = 11.6% _F = 23.22	rs954820	A	G	0.5619	0.0083	0.0018	2.57e-06
Stearate (18:0)_ K = 44_ R2 = 11.6% _F = 23.22	rs2115366	T	C	0.4418	-0.0079	0.0017	3.927e-06
Stearate (18:0)_ K = 44_ R2 = 11.6% _F = 23.22	rs1348656	T	C	0.798	-0.0137	0.0024	1.169e-08
Stearate (18:0)_ K = 44_ R2 = 11.6% _F = 23.22	rs6883481	T	C	0.4737	0.0077	0.0017	6.17e-06
Stearate (18:0)_ K = 44_ R2 = 11.6% _F = 23.22	rs7583745	T	C	0.8839	-0.0262	0.0055	1.487e-06
Stearate (18:0)_ K = 44_ R2 = 11.6% _F = 23.22	rs1426441	A	G	0.1423	0.0113	0.0025	4.871e-06
Stearate (18:0)_ K = 44_ R2 = 11.6% _F = 23.22	rs4428485	A	G	0.6299	0.0078	0.0017	5.242e-06
Stearate (18:0)_ K = 44_ R2 = 11.6% _F = 23.22	rs4961155	C	G	0.4226	0.0077	0.0017	6.074e-06
Stearate (18:0)_ K = 44_ R2 = 11.6% _F = 23.22	rs9568232	T	C	0.1152	0.0126	0.0028	5.056e-06
Stearate (18:0)_ K = 44_ R2 = 11.6% _F = 23.22	rs2100884	T	C	0.4375	-0.0084	0.0017	8.6e-07
Stearate (18:0)_ K = 44_ R2 = 11.6% _F = 23.22	rs216283	A	C	0.4171	0.008	0.0017	2.631e-06
Stearate (18:0)_ K = 44_ R2 = 11.6% _F = 23.22	rs17081305	T	C	0.9656	0.0231	0.005	3.566e-06
Stearate (18:0)_ K = 44_ R2 = 11.6% _F = 23.22	rs3793900	A	C	0.6337	-0.0078	0.0017	5.733e-06
Stearate (18:0)_ K = 44_ R2 = 11.6% _F = 23.22	rs3863373	A	C	0.3335	-0.008	0.0017	4.205e-06
Stearate (18:0)_ K = 44_ R2 = 11.6% _F = 23.22	rs6453591	A	T	0.7713	0.0106	0.0024	8.495e-06
Stearate (18:0)_ K = 44_ R2 = 11.6% _F = 23.22	rs9809122	A	G	0.5295	-0.0087	0.0017	3.924e-07
Stearate (18:0)_ K = 44_ R2 = 11.6% _F = 23.22	rs1993110	A	G	0.8388	-0.0153	0.0025	4.693e-10
Stearate (18:0)_ K = 44_ R2 = 11.6% _F = 23.22	rs4420815	A	G	0.143	-0.014	0.003	3.061e-06
Stearate (18:0)_ K = 44_ R2 = 11.6% _F = 23.22	rs10152773	T	C	0.0425	-0.0224	0.0049	4.733e-06
Stearate (18:0)_ K = 44_ R2 = 11.6% _F = 23.22	rs3748771	T	G	0.9877	-0.0671	0.0149	6.346e-06
Stearate (18:0)_ K = 44_ R2 = 11.6% _F = 23.22	rs1075227	T	C	0.552	0.009	0.002	6.795e-06
Stearate (18:0)_ K = 44_ R2 = 11.6% _F = 23.22	rs12353451	A	G	0.0373	-0.0223	0.0049	6.061e-06
Stearate (18:0)_ K = 44_ R2 = 11.6% _F = 23.22	rs1919403	T	G	0.3842	-0.0076	0.0017	9.744e-06
Stearate (18:0)_ K = 44_ R2 = 11.6% _F = 23.22	rs281216	T	G	0.9187	0.0149	0.0033	8.264e-06
Stearate (18:0)_ K = 44_ R2 = 11.6% _F = 23.22	rs9993153	A	G	0.5784	0.0078	0.0017	4.678e-06
Stearate (18:0)_ K = 44_ R2 = 11.6% _F = 23.22	rs2305384	A	G	0.3977	-0.0077	0.0017	5.704e-06
Stearate (18:0)_ K = 44_ R2 = 11.6% _F = 23.22	rs10853932	T	C	0.345	0.008	0.0018	5.449e-06
Stearate (18:0)_ K = 44_ R2 = 11.6% _F = 23.22	rs10757839	T	C	0.6521	0.0079	0.0017	4.739e-06
Stearate (18:0)_ K = 44_ R2 = 11.6% _F = 23.22	rs1237044	T	C	0.5836	0.0081	0.0018	5.097e-06
Stearate (18:0)_ K = 44_ R2 = 11.6% _F = 23.22	rs713834	A	C	0.4841	0.0082	0.0017	1.194e-06
Stearate (18:0)_ K = 44_ R2 = 11.6% _F = 23.22	rs1662999	T	C	0.6325	0.0079	0.0017	4.209e-06
Stearate (18:0)_ K = 44_ R2 = 11.6% _F = 23.22	rs1480309	T	C	0.3479	-0.0078	0.0017	5.199e-06
Stearate (18:0)_ K = 44_ R2 = 11.6% _F = 23.22	rs10242171	A	G	0.1356	-0.012	0.0026	4.246e-06
Stearate (18:0)_ K = 44_ R2 = 11.6% _F = 23.22	rs1477025	T	C	0.6547	0.0087	0.0017	4.828e-07
Stearate (18:0)_ K = 44_ R2 = 11.6% _F = 23.22	rs7097675	A	T	0.6099	0.0079	0.0017	3.994e-06
Stearate (18:0)_ K = 44_ R2 = 11.6% _F = 23.22	rs2495718	T	C	0.5176	-0.0076	0.0017	7.925e-06
Stearate (18:0)_ K = 44_ R2 = 11.6% _F = 23.22	rs10498606	A	C	0.4534	-0.0077	0.0017	6.402e-06
Stearate (18:0)_ K = 44_ R2 = 11.6% _F = 23.22	rs2929381	C	G	0.5722	0.008	0.0017	2.954e-06
Stearate (18:0)_ K = 44_ R2 = 11.6% _F = 23.22	rs7996008	A	G	0.2935	0.0079	0.0017	5.685e-06
Oleate (18:1N9) Number of SNPs: 21 Variation explained (R2): 5.7% F statistic: 22.26	rs11118120	A	C	0.8514	-0.0142	0.0031	6.009e-06
Oleate (18:1N9)_ K = 21_ R2 = 5.7% _F = 22.26	rs10088476	A	G	0.1244	0.0153	0.0033	3.547e-06
Oleate (18:1N9)_ K = 21_ R2 = 5.7% _F = 22.26	rs17495226	A	G	0.0566	0.0216	0.0047	5.667e-06
Oleate (18:1N9)_ K = 21_ R2 = 5.7% _F = 22.26	rs7951538	C	G	0.7061	-0.0107	0.0024	8.092e-06
Oleate (18:1N9)_ K = 21_ R2 = 5.7% _F = 22.26	rs9861865	C	G	0.3196	-0.0107	0.0024	8.06e-06
Oleate (18:1N9)_ K = 21_ R2 = 5.7% _F = 22.26	rs4654501	A	G	0.7667	0.011	0.0025	7.407e-06
Oleate (18:1N9)_ K = 21_ R2 = 5.7% _F = 22.26	rs1922578	A	G	0.9821	-0.0391	0.0088	9.363e-06
Oleate (18:1N9)_ K = 21_ R2 = 5.7% _F = 22.26	rs13019537	C	G	0.841	0.0157	0.0032	7.521e-07
Oleate (18:1N9)_ K = 21_ R2 = 5.7% _F = 22.26	rs2017823	A	G	0.841	0.0142	0.0031	4.849e-06
Oleate (18:1N9)_ K = 21_ R2 = 5.7% _F = 22.26	rs4573205	T	G	0.8698	-0.0146	0.0033	8.717e-06
Oleate (18:1N9)_ K = 21_ R2 = 5.7% _F = 22.26	rs1348656	T	C	0.7976	-0.0172	0.003	1.058e-08
Oleate (18:1N9)_ K = 21_ R2 = 5.7% _F = 22.26	rs4353846	T	C	0.5643	-0.0112	0.0023	1.7e-06
Oleate (18:1N9)_ K = 21_ R2 = 5.7% _F = 22.26	rs7586280	A	T	0.3011	-0.011	0.0024	4.106e-06
Oleate (18:1N9)_ K = 21_ R2 = 5.7% _F = 22.26	rs35350	A	G	0.9692	0.0376	0.0083	5.443e-06
Oleate (18:1N9)_ K = 21_ R2 = 5.7% _F = 22.26	rs4287543	A	G	0.8771	0.015	0.0033	4.542e-06
Oleate (18:1N9)_ K = 21_ R2 = 5.7% _F = 22.26	rs11133892	A	G	0.4423	0.012	0.0023	2.648e-07
Oleate (18:1N9)_ K = 21_ R2 = 5.7% _F = 22.26	rs7898173	A	G	0.1431	-0.0138	0.0031	8.957e-06
Oleate (18:1N9)_ K = 21_ R2 = 5.7% _F = 22.26	rs4527065	T	C	0.7333	0.0111	0.0025	5.783e-06
Oleate (18:1N9)_ K = 21_ R2 = 5.7% _F = 22.26	rs10242171	A	G	0.135	-0.0154	0.0033	4.315e-06
Oleate (18:1N9)_ K = 21_ R2 = 5.7% _F = 22.26	rs10746614	A	G	0.2333	-0.0114	0.0025	4.049e-06
Oleate (18:1N9)_ K = 21_ R2 = 5.7% _F = 22.26	rs12193274	T	G	0.2402	-0.0112	0.0025	6.068e-06
Oleate (18:1N9)_ K = 21_ R2 = 5.7% _F = 22.26	rs2929381	C	G	0.5777	0.0105	0.0023	7.087e-06
Pentadecanoate (15:0) Number of SNPs: 20 Variation explained (R2): 5.3% F statistic: 21.93	rs8098317	T	G	0.7857	-0.0119	0.0026	6.643e-06
Pentadecanoate (15:0)_ K = 20_ R2 = 5.3% _F = 21.93	rs1830241	A	G	0.3431	0.0118	0.0026	7.497e-06
Pentadecanoate (15:0)_ K = 20_ R2 = 5.3% _F = 21.93	rs788711	T	C	0.2612	0.0119	0.0026	3.985e-06
Pentadecanoate (15:0)_ K = 20_ R2 = 5.3% _F = 21.93	rs3135459	T	C	0.7047	0.0118	0.0026	4.085e-06
Pentadecanoate (15:0)_ K = 20_ R2 = 5.3% _F = 21.93	rs7710912	A	G	0.0728	-0.0189	0.0042	8.302e-06
Pentadecanoate (15:0)_ K = 20_ R2 = 5.3% _F = 21.93	rs6783294	A	G	0.4281	-0.0213	0.0045	2.41e-06
Pentadecanoate (15:0)_ K = 20_ R2 = 5.3% _F = 21.93	rs16830012	T	G	0.9719	-0.0328	0.0073	7.407e-06
Pentadecanoate (15:0)_ K = 20_ R2 = 5.3% _F = 21.93	rs17056226	T	G	0.1416	0.0153	0.0034	7.065e-06
Pentadecanoate (15:0)_ K = 20_ R2 = 5.3% _F = 21.93	rs1571091	T	G	0.1959	-0.012	0.0026	5.797e-06
Pentadecanoate (15:0)_ K = 20_ R2 = 5.3% _F = 21.93	rs4960640	T	C	0.9667	-0.0285	0.0064	9.695e-06
Pentadecanoate (15:0)_ K = 20_ R2 = 5.3% _F = 21.93	rs6472299	A	G	0.8381	-0.0149	0.0033	7.866e-06
Pentadecanoate (15:0)_ K = 20_ R2 = 5.3% _F = 21.93	rs6887589	A	G	0.7787	-0.0142	0.0026	4.33e-08
Pentadecanoate (15:0)_ K = 20_ R2 = 5.3% _F = 21.93	rs7115681	T	C	0.4664	-0.0113	0.0025	8.618e-06
Pentadecanoate (15:0)_ K = 20_ R2 = 5.3% _F = 21.93	rs7602480	A	G	0.3815	-0.0122	0.0025	1.207e-06
Pentadecanoate (15:0)_ K = 20_ R2 = 5.3% _F = 21.93	rs3900774	T	G	0.988	0.061	0.013	2.701e-06
Pentadecanoate (15:0)_ K = 20_ R2 = 5.3% _F = 21.93	rs10509840	A	G	0.6879	-0.0119	0.0026	4.225e-06
Pentadecanoate (15:0)_ K = 20_ R2 = 5.3% _F = 21.93	rs11791164	T	G	0.0803	0.0196	0.0043	4.345e-06
Pentadecanoate (15:0)_ K = 20_ R2 = 5.3% _F = 21.93	rs17773390	A	G	0.2915	0.0123	0.0026	3.254e-06
Pentadecanoate (15:0)_ K = 20_ R2 = 5.3% _F = 21.93	rs11245200	T	C	0.1119	0.018	0.004	8.941e-06
Pentadecanoate (15:0)_ K = 20_ R2 = 5.3% _F = 21.93	rs997899	T	C	0.6541	-0.0111	0.0025	9.03e-06
Myristate (14:0) Number of SNPs: 25 Variation explained (R2): 6.5% F statistic: 21.77	rs670365	A	G	0.0903	0.039	0.0088	9.48e-06
Myristate (14:0)_ K = 25_ R2 = 6.5% _F = 21.77	rs10831497	A	G	0.2209	0.0126	0.0028	4.968e-06
Myristate (14:0)_ K = 25_ R2 = 6.5% _F = 21.77	rs13393013	A	G	0.0218	0.0415	0.0085	1.075e-06
Myristate (14:0)_ K = 25_ R2 = 6.5% _F = 21.77	rs12967799	A	C	0.0794	0.0193	0.0043	6.129e-06
Myristate (14:0)_ K = 25_ R2 = 6.5% _F = 21.77	rs4710948	A	G	0.3383	-0.0115	0.0025	4.85e-06
Myristate (14:0)_ K = 25_ R2 = 6.5% _F = 21.77	rs7796330	T	C	0.2727	0.0116	0.0026	7.927e-06
Myristate (14:0)_ K = 25_ R2 = 6.5% _F = 21.77	rs12426539	T	C	0.0306	0.0405	0.0091	9.311e-06
Myristate (14:0)_ K = 25_ R2 = 6.5% _F = 21.77	rs314241	T	C	0.4625	-0.0114	0.0025	5.249e-06
Myristate (14:0)_ K = 25_ R2 = 6.5% _F = 21.77	rs35350	A	G	0.9722	0.0397	0.0089	8.097e-06
Myristate (14:0)_ K = 25_ R2 = 6.5% _F = 21.77	rs453612	T	C	0.3549	0.0114	0.0025	5.854e-06
Myristate (14:0)_ K = 25_ R2 = 6.5% _F = 21.77	rs1558001	T	C	0.3989	-0.0112	0.0025	7.236e-06
Myristate (14:0)_ K = 25_ R2 = 6.5% _F = 21.77	rs6665988	A	C	0.7127	-0.0115	0.0026	9.113e-06
Myristate (14:0)_ K = 25_ R2 = 6.5% _F = 21.77	rs10900161	T	C	0.7711	0.0115	0.0026	9.595e-06
Myristate (14:0)_ K = 25_ R2 = 6.5% _F = 21.77	rs603424	A	G	0.1832	0.0162	0.0032	5.756e-07
Myristate (14:0)_ K = 25_ R2 = 6.5% _F = 21.77	rs10004910	A	G	0.5631	0.0112	0.0025	7.034e-06
Myristate (14:0)_ K = 25_ R2 = 6.5% _F = 21.77	rs10164158	A	G	0.0577	0.0229	0.005	4.179e-06
Myristate (14:0)_ K = 25_ R2 = 6.5% _F = 21.77	rs4420815	A	G	0.143	-0.019	0.004	2.034e-06
Myristate (14:0)_ K = 25_ R2 = 6.5% _F = 21.77	rs10005295	A	G	0.0267	-0.0634	0.0136	3.398e-06
Myristate (14:0)_ K = 25_ R2 = 6.5% _F = 21.77	rs11118121	T	C	0.75	-0.0122	0.0026	1.929e-06
Myristate (14:0)_ K = 25_ R2 = 6.5% _F = 21.77	rs3759526	T	C	0.0806	-0.0209	0.0043	8.927e-07
Myristate (14:0)_ K = 25_ R2 = 6.5% _F = 21.77	rs17155949	T	C	0.9746	0.0698	0.0153	4.752e-06
Myristate (14:0)_ K = 25_ R2 = 6.5% _F = 21.77	rs4109037	A	T	0.146	0.0162	0.0033	9.489e-07
Myristate (14:0)_ K = 25_ R2 = 6.5% _F = 21.77	rs10494825	T	C	0.2783	-0.0114	0.0026	9.586e-06
Myristate (14:0)_ K = 25_ R2 = 6.5% _F = 21.77	rs12250605	T	C	0.751	0.0122	0.0026	2.015e-06
Myristate (14:0)_ K = 25_ R2 = 6.5% _F = 21.77	rs1390248	T	C	0.7461	0.0115	0.0026	8.71e-06
Pipecolate Number of SNPs: 16 Variation explained (R2): 4.3% F statistic: 21.87	rs9460045	T	C	0.9224	-0.0529	0.0119	8.911e-06
Pipecolate_ K = 16_ R2 = 4.3% _F = 21.87	rs3915237	T	G	0.7005	-0.0182	0.004	5.519e-06
Pipecolate_ K = 16_ R2 = 4.3% _F = 21.87	rs35421463	A	G	0.4033	0.0277	0.006	4.148e-06
Pipecolate_ K = 16_ R2 = 4.3% _F = 21.87	rs7871735	T	G	0.2953	0.0184	0.004	3.395e-06
Pipecolate_ K = 16_ R2 = 4.3% _F = 21.87	rs1476414	C	G	0.0535	0.0397	0.0081	9.299e-07
Pipecolate_ K = 16_ R2 = 4.3% _F = 21.87	rs4590377	T	C	0.7362	-0.0178	0.004	8.786e-06
Pipecolate_ K = 16_ R2 = 4.3% _F = 21.87	rs12726206	A	G	0.2486	0.0206	0.004	3.297e-07
Pipecolate_ K = 16_ R2 = 4.3% _F = 21.87	rs7561932	T	C	0.7721	0.0184	0.0042	9.551e-06
Pipecolate_ K = 16_ R2 = 4.3% _F = 21.87	rs11184997	A	T	0.2894	0.0179	0.0039	6.013e-06
Pipecolate_ K = 16_ R2 = 4.3% _F = 21.87	rs10789074	A	G	0.233	-0.0204	0.0042	1.057e-06
Pipecolate_ K = 16_ R2 = 4.3% _F = 21.87	rs9295427	A	G	0.9408	0.0356	0.0077	3.808e-06
Pipecolate_ K = 16_ R2 = 4.3% _F = 21.87	rs4443239	T	G	0.7453	0.031	0.0069	7.58e-06
Pipecolate_ K = 16_ R2 = 4.3% _F = 21.87	rs4717457	A	C	0.1392	0.0233	0.0052	6.802e-06
Pipecolate_ K = 16_ R2 = 4.3% _F = 21.87	rs6497209	A	G	0.2139	0.019	0.0042	4.779e-06
Pipecolate_ K = 16_ R2 = 4.3% _F = 21.87	rs11718405	T	C	0.8358	0.0216	0.0048	8.433e-06
Pipecolate_ K = 16_ R2 = 4.3% _F = 21.87	rs4669590	A	T	0.5087	-0.0214	0.0048	7.917e-06
Pipecolate_ K = 16_ R2 = 4.3% _F = 21.87	rs699474	C	G	0.0134	0.1282	0.0264	1.158e-06
Ornithine Number of SNPs: 11 Variation explained (R2): 3% F statistic: 22.16	rs6975921	A	G	0.9095	0.0343	0.0071	1.246e-06
Ornithine_ K = 11_ R2 = 3% _F = 22.16	rs2351725	A	T	0.7947	-0.0119	0.0026	5.841e-06
Ornithine_ K = 11_ R2 = 3% _F = 22.16	rs4812400	A	T	0.9092	0.0178	0.0039	4.893e-06
Ornithine_ K = 11_ R2 = 3% _F = 22.16	rs12991491	A	G	0.7918	0.0113	0.0025	8.142e-06
Ornithine_ K = 11_ R2 = 3% _F = 22.16	rs11701867	A	C	0.1761	-0.0136	0.0027	2.753e-07
Ornithine_ K = 11_ R2 = 3% _F = 22.16	rs13424082	A	G	0.1735	-0.0125	0.0026	1.799e-06
Ornithine_ K = 11_ R2 = 3% _F = 22.16	rs874431	A	G	0.3048	0.0125	0.0025	3.452e-07
Ornithine_ K = 11_ R2 = 3% _F = 22.16	rs10900040	T	C	0.8351	-0.0144	0.0031	3.401e-06
Ornithine_ K = 11_ R2 = 3% _F = 22.16	rs10945970	T	C	0.3103	-0.011	0.0025	7.379e-06
Ornithine_ K = 11_ R2 = 3% _F = 22.16	rs11614168	T	C	0.1322	-0.015	0.0034	7.679e-06
Ornithine_ K = 11_ R2 = 3% _F = 22.16	rs4764034	A	G	0.6869	-0.011	0.0024	7.669e-06
5-Oxoproline Number of SNPs: 25 Variation explained (R2): 12.2% F statistic: 43.2	rs10853533	A	C	0.8743	0.0103	0.0023	6.086e-06
5-Oxoproline_ K = 25_ R2 = 12.2% _F = 43.2	rs306676	A	G	0.1304	0.0112	0.0024	2.484e-06
5-Oxoproline_ K = 25_ R2 = 12.2% _F = 43.2	rs1001210	T	C	0.8353	-0.0106	0.0023	3.798e-06
5-Oxoproline_ K = 25_ R2 = 12.2% _F = 43.2	rs4646693	T	C	0.435	-0.009	0.002	6.795e-06
5-Oxoproline_ K = 25_ R2 = 12.2% _F = 43.2	rs2115151	A	T	0.8627	0.0103	0.0022	3.752e-06
5-Oxoproline_ K = 25_ R2 = 12.2% _F = 43.2	rs13159409	T	G	0.0652	-0.0148	0.0032	2.741e-06
5-Oxoproline_ K = 25_ R2 = 12.2% _F = 43.2	rs11605366	T	C	0.1024	-0.0122	0.0027	7.552e-06
5-Oxoproline_ K = 25_ R2 = 12.2% _F = 43.2	rs13013224	C	G	0.1794	0.0113	0.0023	7.044e-07
5-Oxoproline_ K = 25_ R2 = 12.2% _F = 43.2	rs6703132	A	T	0.5183	0.0067	0.0015	9.893e-06
5-Oxoproline_ K = 25_ R2 = 12.2% _F = 43.2	rs8092658	A	C	0.389	-0.009	0.002	6.795e-06
5-Oxoproline_ K = 25_ R2 = 12.2% _F = 43.2	rs17017431	A	T	0.8539	0.0105	0.0023	3.797e-06
5-Oxoproline_ K = 25_ R2 = 12.2% _F = 43.2	rs7973508	A	G	0.2831	-0.0073	0.0016	5.403e-06
5-Oxoproline_ K = 25_ R2 = 12.2% _F = 43.2	rs11986602	A	T	0.092	-0.062	0.0029	1.07e-104
5-Oxoproline_ K = 25_ R2 = 12.2% _F = 43.2	rs9460424	T	G	0.8437	-0.0097	0.0022	9.164e-06
5-Oxoproline_ K = 25_ R2 = 12.2% _F = 43.2	rs2068157	T	C	0.9144	0.0137	0.0031	8.989e-06
5-Oxoproline_ K = 25_ R2 = 12.2% _F = 43.2	rs10890517	T	C	0.0433	-0.0197	0.0043	3.448e-06
5-Oxoproline_ K = 25_ R2 = 12.2% _F = 43.2	rs12611788	T	C	0.6267	-0.007	0.0015	5.507e-06
5-Oxoproline_ K = 25_ R2 = 12.2% _F = 43.2	rs9987070	C	G	0.9808	-0.028	0.0059	2.432e-06
5-Oxoproline_ K = 25_ R2 = 12.2% _F = 43.2	rs9964014	T	C	0.1115	-0.0132	0.0025	1.796e-07
5-Oxoproline_ K = 25_ R2 = 12.2% _F = 43.2	rs12464424	T	C	0.7097	-0.0071	0.0016	7.472e-06
5-Oxoproline_ K = 25_ R2 = 12.2% _F = 43.2	rs7015048	T	C	0.5288	0.01	0.0015	3.159e-11
5-Oxoproline_ K = 25_ R2 = 12.2% _F = 43.2	rs12294182	T	C	0.0987	0.014	0.0029	1.071e-06
5-Oxoproline_ K = 25_ R2 = 12.2% _F = 43.2	rs5764925	A	G	0.0772	-0.016	0.0031	1.906e-07
5-Oxoproline_ K = 25_ R2 = 12.2% _F = 43.2	rs12143589	A	G	0.1428	0.0118	0.0023	3.381e-07
5-Oxoproline_ K = 25_ R2 = 12.2% _F = 43.2	rs9650466	T	C	0.534	0.011	0.002	3.798e-08
5-Oxoproline_ K = 25_ R2 = 12.2% _F = 43.2	rs1578743	A	C	0.6068	0.0075	0.0016	1.7e-06
Pantothenate Number of SNPs: 26 Variation explained (R2): 6.9% F statistic: 22.35	rs6774965	A	G	0.8582	-0.0163	0.0035	3.16e-06
Pantothenate_ K = 26_ R2 = 6.9% _F = 22.35	rs12536076	T	G	0.9774	-0.0508	0.0113	7.089e-06
Pantothenate_ K = 26_ R2 = 6.9% _F = 22.35	rs6848070	A	G	0.3521	-0.0117	0.0027	9.911e-06
Pantothenate_ K = 26_ R2 = 6.9% _F = 22.35	rs1350858	A	C	0.1783	0.0152	0.0034	8.213e-06
Pantothenate_ K = 26_ R2 = 6.9% _F = 22.35	rs3949865	C	G	0.6187	-0.0115	0.0026	9.491e-06
Pantothenate_ K = 26_ R2 = 6.9% _F = 22.35	rs2703805	T	C	0.6098	-0.0116	0.0026	7.48e-06
Pantothenate_ K = 26_ R2 = 6.9% _F = 22.35	rs1282954	T	C	0.9814	-0.1421	0.0287	7.113e-07
Pantothenate_ K = 26_ R2 = 6.9% _F = 22.35	rs271072	A	C	0.3841	-0.0118	0.0026	5.941e-06
Pantothenate_ K = 26_ R2 = 6.9% _F = 22.35	rs11672098	C	G	0.689	-0.0125	0.0026	2.295e-06
Pantothenate_ K = 26_ R2 = 6.9% _F = 22.35	rs17751805	A	G	0.9645	0.0628	0.0135	3.399e-06
Pantothenate_ K = 26_ R2 = 6.9% _F = 22.35	rs4269521	A	G	0.8431	0.0168	0.0034	1.034e-06
Pantothenate_ K = 26_ R2 = 6.9% _F = 22.35	rs4746017	A	C	0.713	-0.0122	0.0027	5.098e-06
Pantothenate_ K = 26_ R2 = 6.9% _F = 22.35	rs6078500	T	C	0.5117	-0.0118	0.0026	4.468e-06
Pantothenate_ K = 26_ R2 = 6.9% _F = 22.35	rs7166370	C	G	0.4297	0.0119	0.0026	5.229e-06
Pantothenate_ K = 26_ R2 = 6.9% _F = 22.35	rs13212846	A	C	0.9252	-0.0241	0.0052	2.882e-06
Pantothenate_ K = 26_ R2 = 6.9% _F = 22.35	rs8065435	A	G	0.327	-0.0128	0.0028	5.034e-06
Pantothenate_ K = 26_ R2 = 6.9% _F = 22.35	rs1275504	A	T	0.2961	-0.0166	0.0026	4.096e-10
Pantothenate_ K = 26_ R2 = 6.9% _F = 22.35	rs7009776	T	C	0.3342	-0.0268	0.006	7.116e-06
Pantothenate_ K = 26_ R2 = 6.9% _F = 22.35	rs11957586	T	C	0.4991	0.0223	0.005	8.657e-06
Pantothenate_ K = 26_ R2 = 6.9% _F = 22.35	rs17426760	A	G	0.1402	0.0157	0.0035	9.389e-06
Pantothenate_ K = 26_ R2 = 6.9% _F = 22.35	rs1975271	T	C	0.5872	0.0116	0.0026	8.682e-06
Pantothenate_ K = 26_ R2 = 6.9% _F = 22.35	rs6034318	A	G	0.013	0.1083	0.0236	4.518e-06
Pantothenate_ K = 26_ R2 = 6.9% _F = 22.35	rs4686592	A	G	0.3192	0.0117	0.0026	7.456e-06
Pantothenate_ K = 26_ R2 = 6.9% _F = 22.35	rs880427	A	G	0.3244	0.0117	0.0026	8.12e-06
Pantothenate_ K = 26_ R2 = 6.9% _F = 22.35	rs9365106	A	G	0.6824	-0.0117	0.0026	8.055e-06
Pantothenate_ K = 26_ R2 = 6.9% _F = 22.35	rs10919047	A	C	0.1408	0.0176	0.0035	6.751e-07
Pantothenate_ K = 26_ R2 = 6.9% _F = 22.35	rs3117851	A	G	0.0231	0.0404	0.009	7.834e-06
Pantothenate_ K = 26_ R2 = 6.9% _F = 22.35	rs11719633	A	G	0.0945	-0.0206	0.0044	3.012e-06
Pantothenate_ K = 26_ R2 = 6.9% _F = 22.35	rs17049936	T	C	0.8912	-0.0187	0.0042	9.584e-06
Salicylate Number of SNPs: 19 Variation explained (R2): 5.1% F statistic: 22.21	rs10205265	T	C	0.2056	-0.0901	0.0202	7.794e-06
Salicylate_ K = 19_ R2 = 5.1% _F = 22.21	rs8178289	A	C	0.8497	-0.1064	0.0233	5.095e-06
Salicylate_ K = 19_ R2 = 5.1% _F = 22.21	rs10056114	A	T	0.0119	0.9152	0.2045	7.617e-06
Salicylate_ K = 19_ R2 = 5.1% _F = 22.21	rs10458721	A	G	0.609	-0.0786	0.0175	7.228e-06
Salicylate_ K = 19_ R2 = 5.1% _F = 22.21	rs12005082	A	T	0.1814	0.1232	0.0265	3.354e-06
Salicylate_ K = 19_ R2 = 5.1% _F = 22.21	rs12075728	T	G	0.9442	-0.4196	0.0922	5.394e-06
Salicylate_ K = 19_ R2 = 5.1% _F = 22.21	rs10984575	A	C	0.1164	0.1144	0.0257	8.271e-06
Salicylate_ K = 19_ R2 = 5.1% _F = 22.21	rs17682068	A	G	0.9248	-0.1299	0.029	7.452e-06
Salicylate_ K = 19_ R2 = 5.1% _F = 22.21	rs5749636	A	G	0.0193	0.9351	0.1842	3.852e-07
Salicylate_ K = 19_ R2 = 5.1% _F = 22.21	rs11256026	A	G	0.6357	-0.2061	0.0409	4.601e-07
Salicylate_ K = 19_ R2 = 5.1% _F = 22.21	rs10402106	T	C	0.0165	0.9529	0.1924	7.348e-07
Salicylate_ K = 19_ R2 = 5.1% _F = 22.21	rs10977627	T	C	0.0168	0.8146	0.1524	9.061e-08
Salicylate_ K = 19_ R2 = 5.1% _F = 22.21	rs1164673	C	G	0.3743	0.0754	0.0168	7.267e-06
Salicylate_ K = 19_ R2 = 5.1% _F = 22.21	rs16832600	T	C	0.0297	0.2205	0.0469	2.579e-06
Salicylate_ K = 19_ R2 = 5.1% _F = 22.21	rs382436	T	C	0.01	0.401	0.09	8.368e-06
Salicylate_ K = 19_ R2 = 5.1% _F = 22.21	rs7701675	A	G	0.9839	-0.7943	0.1733	4.558e-06
Salicylate_ K = 19_ R2 = 5.1% _F = 22.21	rs10513356	A	T	0.01	0.407	0.088	3.746e-06
Salicylate_ K = 19_ R2 = 5.1% _F = 22.21	rs10471169	T	C	0.0105	0.9362	0.1854	4.427e-07
Salicylate_ K = 19_ R2 = 5.1% _F = 22.21	rs9453415	A	G	0.011	0.374	0.083	6.605e-06
Salicylate_ K = 19_ R2 = 5.1% _F = 22.21	rs10749555	A	C	0.3248	-0.0826	0.0184	7.587e-06
4-Acetamidobutanoate Number of SNPs: 36 Variation explained (R2): 9.7% F statistic: 23.32	rs11127215	T	C	0.69	-0.0079	0.0018	9.16e-06
4-Acetamidobutanoate_ K = 36_ R2 = 9.7% _F = 23.32	rs4603646	T	C	0.4689	0.0084	0.0018	1.849e-06
4-Acetamidobutanoate_ K = 36_ R2 = 9.7% _F = 23.32	rs10496826	A	G	0.2948	-0.008	0.0018	7.767e-06
4-Acetamidobutanoate_ K = 36_ R2 = 9.7% _F = 23.32	rs7943587	A	C	0.1515	-0.0115	0.0026	6.326e-06
4-Acetamidobutanoate_ K = 36_ R2 = 9.7% _F = 23.32	rs13259283	T	C	0.3961	0.0086	0.0018	1.213e-06
4-Acetamidobutanoate_ K = 36_ R2 = 9.7% _F = 23.32	rs4687937	T	C	0.3741	-0.0079	0.0018	9.469e-06
4-Acetamidobutanoate_ K = 36_ R2 = 9.7% _F = 23.32	rs2252585	T	C	0.7349	-0.0081	0.0018	5.967e-06
4-Acetamidobutanoate_ K = 36_ R2 = 9.7% _F = 23.32	rs2604548	T	C	0.6463	-0.0086	0.0018	1.285e-06
4-Acetamidobutanoate_ K = 36_ R2 = 9.7% _F = 23.32	rs16893796	T	C	0.9677	-0.0244	0.0055	8.875e-06
4-Acetamidobutanoate_ K = 36_ R2 = 9.7% _F = 23.32	rs1556880	T	C	0.2976	0.0081	0.0018	6.043e-06
4-Acetamidobutanoate_ K = 36_ R2 = 9.7% _F = 23.32	rs1495742	T	C	0.5073	-0.0097	0.0017	2.672e-08
4-Acetamidobutanoate_ K = 36_ R2 = 9.7% _F = 23.32	rs4692012	A	G	0.5389	-0.0082	0.0018	3.347e-06
4-Acetamidobutanoate_ K = 36_ R2 = 9.7% _F = 23.32	rs164742	A	G	0.4697	-0.0079	0.0018	7.375e-06
4-Acetamidobutanoate_ K = 36_ R2 = 9.7% _F = 23.32	rs11650615	C	G	0.6907	0.0081	0.0018	5.987e-06
4-Acetamidobutanoate_ K = 36_ R2 = 9.7% _F = 23.32	rs11676201	T	C	0.2929	0.0087	0.0018	1.525e-06
4-Acetamidobutanoate_ K = 36_ R2 = 9.7% _F = 23.32	rs10004130	A	G	0.581	0.009	0.002	6.795e-06
4-Acetamidobutanoate_ K = 36_ R2 = 9.7% _F = 23.32	rs10766197	A	G	0.4631	-0.0087	0.0018	6.803e-07
4-Acetamidobutanoate_ K = 36_ R2 = 9.7% _F = 23.32	rs1604290	A	C	0.3851	-0.0079	0.0018	8.13e-06
4-Acetamidobutanoate_ K = 36_ R2 = 9.7% _F = 23.32	rs11170032	T	C	0.64	-0.008	0.0018	7.178e-06
4-Acetamidobutanoate_ K = 36_ R2 = 9.7% _F = 23.32	rs541633	T	C	0.0626	-0.0167	0.0036	2.871e-06
4-Acetamidobutanoate_ K = 36_ R2 = 9.7% _F = 23.32	rs3758197	C	G	0.3482	0.011	0.0025	8.402e-06
4-Acetamidobutanoate_ K = 36_ R2 = 9.7% _F = 23.32	rs9940567	T	C	0.7319	0.0095	0.0018	1.574e-07
4-Acetamidobutanoate_ K = 36_ R2 = 9.7% _F = 23.32	rs1812125	T	G	0.7578	-0.0085	0.0018	3.484e-06
4-Acetamidobutanoate_ K = 36_ R2 = 9.7% _F = 23.32	rs9354329	T	C	0.6322	-0.0081	0.0018	5.104e-06
4-Acetamidobutanoate_ K = 36_ R2 = 9.7% _F = 23.32	rs890984	A	G	0.1092	-0.012	0.0027	6.908e-06
4-Acetamidobutanoate_ K = 36_ R2 = 9.7% _F = 23.32	rs7817770	T	C	0.3971	0.0094	0.0018	9.422e-08
4-Acetamidobutanoate_ K = 36_ R2 = 9.7% _F = 23.32	rs1538330	T	G	0.0213	-0.0306	0.0064	1.728e-06
4-Acetamidobutanoate_ K = 36_ R2 = 9.7% _F = 23.32	rs2374393	C	G	0.4365	0.0078	0.0018	9.218e-06
4-Acetamidobutanoate_ K = 36_ R2 = 9.7% _F = 23.32	rs604388	T	C	0.6845	0.0086	0.0018	1.562e-06
4-Acetamidobutanoate_ K = 36_ R2 = 9.7% _F = 23.32	rs17642859	A	T	0.1138	-0.0173	0.0033	1.16e-07
4-Acetamidobutanoate_ K = 36_ R2 = 9.7% _F = 23.32	rs4443239	T	G	0.7446	0.02	0.0042	2.265e-06
4-Acetamidobutanoate_ K = 36_ R2 = 9.7% _F = 23.32	rs1357714	C	G	0.3248	-0.0079	0.0018	9.446e-06
4-Acetamidobutanoate_ K = 36_ R2 = 9.7% _F = 23.32	rs6483911	A	T	0.2876	0.008	0.0018	8.917e-06
4-Acetamidobutanoate_ K = 36_ R2 = 9.7% _F = 23.32	rs10416031	A	G	0.3202	0.0085	0.0018	3.84e-06
4-Acetamidobutanoate_ K = 36_ R2 = 9.7% _F = 23.32	rs3813810	A	C	0.1334	0.0117	0.0026	5.725e-06
4-Acetamidobutanoate_ K = 36_ R2 = 9.7% _F = 23.32	rs2144834	A	G	0.2535	0.008	0.0018	7.973e-06
4-Acetamidobutanoate_ K = 36_ R2 = 9.7% _F = 23.32	rs11645981	T	C	0.275	-0.0082	0.0018	4.7e-06
4-Acetamidobutanoate_ K = 36_ R2 = 9.7% _F = 23.32	rs6915895	A	G	0.7489	-0.0086	0.0018	1.925e-06
4-Acetamidobutanoate_ K = 36_ R2 = 9.7% _F = 23.32	rs10088762	A	G	0.5327	-0.011	0.0018	4.476e-10
Alpha-Tocopherol Number of SNPs: 11 Variation explained (R2): 2.9% F statistic: 21.37	rs10245705	T	C	0.0181	-0.0663	0.0127	1.946e-07
Alpha-Tocopherol_ K = 11_ R2 = 2.9% _F = 21.37	rs5997646	A	T	0.8238	0.017	0.0038	9.279e-06
Alpha-Tocopherol_ K = 11_ R2 = 2.9% _F = 21.37	rs7930821	T	C	0.0202	0.0666	0.0149	7.53e-06
Alpha-Tocopherol_ K = 11_ R2 = 2.9% _F = 21.37	rs11145330	A	C	0.8908	0.0324	0.0068	1.945e-06
Alpha-Tocopherol_ K = 11_ R2 = 2.9% _F = 21.37	rs2062723	T	C	0.5467	0.0138	0.0031	6.861e-06
Alpha-Tocopherol_ K = 11_ R2 = 2.9% _F = 21.37	rs713128	A	G	0.7743	-0.0224	0.005	8.59e-06
Alpha-Tocopherol_ K = 11_ R2 = 2.9% _F = 21.37	rs9954319	A	G	0.8926	0.0236	0.0051	3.15e-06
Alpha-Tocopherol_ K = 11_ R2 = 2.9% _F = 21.37	rs11992435	A	G	0.9488	0.0327	0.0072	6.383e-06
Alpha-Tocopherol_ K = 11_ R2 = 2.9% _F = 21.37	rs10163969	T	G	0.0412	-0.0352	0.008	9.385e-06
Alpha-Tocopherol_ K = 11_ R2 = 2.9% _F = 21.37	rs10935814	A	G	0.1006	-0.037	0.0083	9.443e-06
Alpha-Tocopherol_ K = 11_ R2 = 2.9% _F = 21.37	rs261342	C	G	0.794	-0.0169	0.0037	5.405e-06
Citrate Number of SNPs: 45 Variation explained (R2): 12.1% F statistic: 23.7	rs8025554	C	G	0.5176	-0.008	0.0018	6.644e-06
Citrate_ K = 45_ R2 = 12.1% _F = 23.7	rs2535496	A	G	0.6511	-0.0083	0.0018	3.053e-06
Citrate_ K = 45_ R2 = 12.1% _F = 23.7	rs11905229	C	G	0.4254	0.0131	0.0029	5.846e-06
Citrate_ K = 45_ R2 = 12.1% _F = 23.7	rs218682	T	C	0.3999	0.0093	0.0018	2.975e-07
Citrate_ K = 45_ R2 = 12.1% _F = 23.7	rs12121428	T	C	0.0535	-0.0197	0.0044	6.094e-06
Citrate_ K = 45_ R2 = 12.1% _F = 23.7	rs7710027	T	C	0.2886	0.0081	0.0018	9.155e-06
Citrate_ K = 45_ R2 = 12.1% _F = 23.7	rs7465310	T	C	0.6291	-0.008	0.0018	7.329e-06
Citrate_ K = 45_ R2 = 12.1% _F = 23.7	rs2239337	C	G	0.0356	0.023	0.0051	7.514e-06
Citrate_ K = 45_ R2 = 12.1% _F = 23.7	rs4589188	A	G	0.2827	0.0122	0.0026	3.343e-06
Citrate_ K = 45_ R2 = 12.1% _F = 23.7	rs9389071	A	G	0.1579	-0.012	0.0026	5.638e-06
Citrate_ K = 45_ R2 = 12.1% _F = 23.7	rs6507399	A	G	0.6713	-0.0101	0.0018	1.703e-08
Citrate_ K = 45_ R2 = 12.1% _F = 23.7	rs6077792	T	G	0.3	-0.0085	0.0018	2.821e-06
Citrate_ K = 45_ R2 = 12.1% _F = 23.7	rs7584253	A	C	0.7047	0.0083	0.0018	5.043e-06
Citrate_ K = 45_ R2 = 12.1% _F = 23.7	rs4235093	A	G	0.2874	-0.0083	0.0018	5.04e-06
Citrate_ K = 45_ R2 = 12.1% _F = 23.7	rs951577	A	G	0.6471	-0.0086	0.0018	1.668e-06
Citrate_ K = 45_ R2 = 12.1% _F = 23.7	rs9646392	T	C	0.0723	-0.017	0.0035	1.384e-06
Citrate_ K = 45_ R2 = 12.1% _F = 23.7	rs9372398	T	C	0.5453	0.0081	0.0018	6.735e-06
Citrate_ K = 45_ R2 = 12.1% _F = 23.7	rs940697	A	G	0.2701	0.0082	0.0018	5.706e-06
Citrate_ K = 45_ R2 = 12.1% _F = 23.7	rs10479093	A	G	0.5923	0.008	0.0018	6.826e-06
Citrate_ K = 45_ R2 = 12.1% _F = 23.7	rs4779800	A	G	0.8831	-0.0122	0.0027	6.056e-06
Citrate_ K = 45_ R2 = 12.1% _F = 23.7	rs16909167	T	C	0.9825	-0.0324	0.0069	2.671e-06
Citrate_ K = 45_ R2 = 12.1% _F = 23.7	rs3193970	T	C	0.5801	0.0081	0.0018	6.065e-06
Citrate_ K = 45_ R2 = 12.1% _F = 23.7	rs13151462	A	T	0.5773	0.0081	0.0018	5.06e-06
Citrate_ K = 45_ R2 = 12.1% _F = 23.7	rs10787308	A	G	0.2701	-0.009	0.0018	6.039e-07
Citrate_ K = 45_ R2 = 12.1% _F = 23.7	rs1125471	A	C	0.2928	-0.0085	0.0018	4.474e-06
Citrate_ K = 45_ R2 = 12.1% _F = 23.7	rs889128	T	G	0.6665	0.0082	0.0018	6.754e-06
Citrate_ K = 45_ R2 = 12.1% _F = 23.7	rs6122890	T	C	0.6626	-0.0085	0.0018	2.114e-06
Citrate_ K = 45_ R2 = 12.1% _F = 23.7	rs588973	A	G	0.646	0.009	0.002	6.795e-06
Citrate_ K = 45_ R2 = 12.1% _F = 23.7	rs10043015	T	C	0.7113	0.0082	0.0018	5.582e-06
Citrate_ K = 45_ R2 = 12.1% _F = 23.7	rs11625985	A	T	0.5566	-0.0081	0.0018	6.714e-06
Citrate_ K = 45_ R2 = 12.1% _F = 23.7	rs13966	T	C	0.467	0.0082	0.0019	9.994e-06
Citrate_ K = 45_ R2 = 12.1% _F = 23.7	rs835155	A	G	0.4762	-0.0109	0.0018	7.538e-10
Citrate_ K = 45_ R2 = 12.1% _F = 23.7	rs13130021	T	C	0.4312	-0.0089	0.0018	1.411e-06
Citrate_ K = 45_ R2 = 12.1% _F = 23.7	rs7919076	T	C	0.3416	-0.0081	0.0018	7.791e-06
Citrate_ K = 45_ R2 = 12.1% _F = 23.7	rs6940937	A	T	0.0128	0.0384	0.0086	7.067e-06
Citrate_ K = 45_ R2 = 12.1% _F = 23.7	rs906749	A	G	0.7158	0.0105	0.0018	1.084e-08
Citrate_ K = 45_ R2 = 12.1% _F = 23.7	rs702697	A	G	0.2423	-0.0082	0.0018	8.938e-06
Citrate_ K = 45_ R2 = 12.1% _F = 23.7	rs11120725	A	G	0.4596	-0.0181	0.0039	4.609e-06
Citrate_ K = 45_ R2 = 12.1% _F = 23.7	rs6678076	A	G	0.0339	-0.0252	0.0052	1.084e-06
Citrate_ K = 45_ R2 = 12.1% _F = 23.7	rs2281651	T	C	0.3542	0.0081	0.0018	7.139e-06
Citrate_ K = 45_ R2 = 12.1% _F = 23.7	rs17034684	T	G	0.2881	0.0081	0.0018	7.899e-06
Citrate_ K = 45_ R2 = 12.1% _F = 23.7	rs10514735	A	G	0.985	0.0346	0.0077	6.505e-06
Citrate_ K = 45_ R2 = 12.1% _F = 23.7	rs4714755	A	G	0.5049	-0.0092	0.0018	2.975e-07
Citrate_ K = 45_ R2 = 12.1% _F = 23.7	rs1530219	A	G	0.4797	-0.0078	0.0018	9.942e-06
Citrate_ K = 45_ R2 = 12.1% _F = 23.7	rs2370136	T	C	0.4875	-0.0086	0.0018	1.249e-06
Citrate_ K = 45_ R2 = 12.1% _F = 23.7	rs1061325	T	C	0.4974	0.0091	0.0018	3.274e-07
Citrate_ K = 45_ R2 = 12.1% _F = 23.7	rs12803308	A	T	0.6752	-0.0081	0.0018	5.967e-06
Citrate_ K = 45_ R2 = 12.1% _F = 23.7	rs1493954	A	G	0.663	-0.0084	0.0018	2.721e-06
Citrate_ K = 45_ R2 = 12.1% _F = 23.7	rs1933013	A	G	0.6068	0.0081	0.0018	6.485e-06
Glycerate Number of SNPs: 17 Variation explained (R2): 4.4% F statistic: 21.17	rs9565365	A	G	0.988	0.064	0.014	4.844e-06
Glycerate_ K = 17_ R2 = 4.4% _F = 21.17	rs2643891	A	G	0.165	-0.018	0.004	6.795e-06
Glycerate_ K = 17_ R2 = 4.4% _F = 21.17	rs6743210	T	C	0.6199	0.0123	0.0026	2.209e-06
Glycerate_ K = 17_ R2 = 4.4% _F = 21.17	rs17131975	A	G	0.0607	-0.0216	0.0048	8.184e-06
Glycerate_ K = 17_ R2 = 4.4% _F = 21.17	rs17086746	T	C	0.02	-0.046	0.01	4.225e-06
Glycerate_ K = 17_ R2 = 4.4% _F = 21.17	rs13138060	A	C	0.8668	-0.0149	0.0033	4.451e-06
Glycerate_ K = 17_ R2 = 4.4% _F = 21.17	rs11724197	A	G	0.8734	0.0159	0.0034	2.294e-06
Glycerate_ K = 17_ R2 = 4.4% _F = 21.17	rs11734847	T	C	0.242	-0.0117	0.0025	3.932e-06
Glycerate_ K = 17_ R2 = 4.4% _F = 21.17	rs10463886	A	T	0.7813	-0.0112	0.0025	8.908e-06
Glycerate_ K = 17_ R2 = 4.4% _F = 21.17	rs7136520	A	G	0.6133	-0.0107	0.0024	7.164e-06
Glycerate_ K = 17_ R2 = 4.4% _F = 21.17	rs4836200	A	G	0.6785	-0.0109	0.0024	5.909e-06
Glycerate_ K = 17_ R2 = 4.4% _F = 21.17	rs17011367	T	C	0.7325	0.0115	0.0026	7.378e-06
Glycerate_ K = 17_ R2 = 4.4% _F = 21.17	rs11618222	T	C	0.1008	-0.0182	0.004	5.999e-06
Glycerate_ K = 17_ R2 = 4.4% _F = 21.17	rs12866131	A	C	0.2805	0.011	0.0024	5.615e-06
Glycerate_ K = 17_ R2 = 4.4% _F = 21.17	rs6478869	T	C	0.3068	0.011	0.0024	6.512e-06
Glycerate_ K = 17_ R2 = 4.4% _F = 21.17	rs9806478	A	T	0.9274	0.0204	0.0046	7.768e-06
Glycerate_ K = 17_ R2 = 4.4% _F = 21.17	rs338526	T	C	0.7181	-0.0111	0.0024	5.606e-06
Glycerate_ K = 17_ R2 = 4.4% _F = 21.17	rs2907828	C	G	0.1375	-0.0188	0.004	2.736e-06
Guanosine Number of SNPs: 12 Variation explained (R2): 3.2% F statistic: 21.25	rs1577941	A	G	0.1187	0.0531	0.0114	3.485e-06
Guanosine_ K = 12_ R2 = 3.2% _F = 21.25	rs11141909	A	C	0.0405	0.0808	0.0182	9.02e-06
Guanosine_ K = 12_ R2 = 3.2% _F = 21.25	rs3770125	T	G	0.0889	0.0559	0.0126	9.231e-06
Guanosine_ K = 12_ R2 = 3.2% _F = 21.25	rs16937869	T	C	0.0137	-0.1788	0.0404	9.737e-06
Guanosine_ K = 12_ R2 = 3.2% _F = 21.25	rs16887484	A	G	0.9585	-0.0991	0.0201	8.815e-07
Guanosine_ K = 12_ R2 = 3.2% _F = 21.25	rs7438272	T	C	0.1691	0.0589	0.0123	1.802e-06
Guanosine_ K = 12_ R2 = 3.2% _F = 21.25	rs2845674	A	T	0.4564	0.0318	0.0071	6.694e-06
Guanosine_ K = 12_ R2 = 3.2% _F = 21.25	rs16933423	A	G	0.9651	0.0891	0.02	8.312e-06
Guanosine_ K = 12_ R2 = 3.2% _F = 21.25	rs7137298	C	G	0.176	-0.0457	0.0103	8.822e-06
Guanosine_ K = 12_ R2 = 3.2% _F = 21.25	rs2072503	C	G	0.0336	0.1028	0.023	7.539e-06
Guanosine_ K = 12_ R2 = 3.2% _F = 21.25	rs9353315	A	G	0.8731	-0.0476	0.0105	5.856e-06
Guanosine_ K = 12_ R2 = 3.2% _F = 21.25	rs4948051	T	C	0.1328	0.0528	0.0115	4.836e-06
Guanosine_ K = 12_ R2 = 3.2% _F = 21.25	rs1964799	T	C	0.6595	0.0349	0.0075	2.977e-06
Guanosine_ K = 12_ R2 = 3.2% _F = 21.25	rs4661299	T	G	0.4551	0.0319	0.0071	7.63e-06
N-Acetylalanine Number of SNPs: 23 Variation explained (R2): 6.1% F statistic: 21.87	rs2486925	T	G	0.1462	-0.0082	0.0018	3.467e-06
N-Acetylalanine_ K = 23_ R2 = 6.1% _F = 21.87	rs11606364	T	C	0.1149	0.0084	0.0019	9.266e-06
N-Acetylalanine_ K = 23_ R2 = 6.1% _F = 21.87	rs6462723	A	G	0.121	-0.0085	0.0018	1.921e-06
N-Acetylalanine_ K = 23_ R2 = 6.1% _F = 21.87	rs7163796	T	C	0.8349	-0.0076	0.0017	7.491e-06
N-Acetylalanine_ K = 23_ R2 = 6.1% _F = 21.87	rs6690829	T	C	0.24	-0.008	0.0016	1.242e-06
N-Acetylalanine_ K = 23_ R2 = 6.1% _F = 21.87	rs2019107	T	C	0.6257	-0.0078	0.0017	6.655e-06
N-Acetylalanine_ K = 23_ R2 = 6.1% _F = 21.87	rs10781282	A	G	0.851	-0.0083	0.0018	2.713e-06
N-Acetylalanine_ K = 23_ R2 = 6.1% _F = 21.87	rs2993308	A	G	0.338	0.0075	0.0017	6.833e-06
N-Acetylalanine_ K = 23_ R2 = 6.1% _F = 21.87	rs11045425	A	G	0.1266	0.0086	0.0018	1.832e-06
N-Acetylalanine_ K = 23_ R2 = 6.1% _F = 21.87	rs1878300	A	G	0.1352	-0.0079	0.0018	8.646e-06
N-Acetylalanine_ K = 23_ R2 = 6.1% _F = 21.87	rs266742	T	G	0.7307	0.0082	0.0016	5.676e-07
N-Acetylalanine_ K = 23_ R2 = 6.1% _F = 21.87	rs10125203	C	G	0.8698	0.009	0.0018	4.109e-07
N-Acetylalanine_ K = 23_ R2 = 6.1% _F = 21.87	rs732426	A	G	0.8218	0.0077	0.0017	7.541e-06
N-Acetylalanine_ K = 23_ R2 = 6.1% _F = 21.87	rs7250750	T	G	0.8583	0.0081	0.0018	7.029e-06
N-Acetylalanine_ K = 23_ R2 = 6.1% _F = 21.87	rs6019504	A	G	0.8586	0.008	0.0018	6.689e-06
N-Acetylalanine_ K = 23_ R2 = 6.1% _F = 21.87	rs10988352	T	G	0.1244	0.0084	0.0018	3.086e-06
N-Acetylalanine_ K = 23_ R2 = 6.1% _F = 21.87	rs513209	A	C	0.8824	-0.0082	0.0018	6.602e-06
N-Acetylalanine_ K = 23_ R2 = 6.1% _F = 21.87	rs9663814	A	G	0.6175	0.0076	0.0016	1.952e-06
N-Acetylalanine_ K = 23_ R2 = 6.1% _F = 21.87	rs10437889	T	C	0.6758	-0.0073	0.0016	8.16e-06
N-Acetylalanine_ K = 23_ R2 = 6.1% _F = 21.87	rs662760	A	C	0.8723	0.0079	0.0018	8.042e-06
N-Acetylalanine_ K = 23_ R2 = 6.1% _F = 21.87	rs10757735	A	C	0.132	-0.008	0.0018	7.911e-06
N-Acetylalanine_ K = 23_ R2 = 6.1% _F = 21.87	rs10090064	T	C	0.8026	0.0077	0.0017	5.931e-06
N-Acetylalanine_ K = 23_ R2 = 6.1% _F = 21.87	rs10850426	T	G	0.1199	0.0081	0.0018	6.845e-06
Urate Number of SNPs: 21 Variation explained (R2): 7% F statistic: 27.88	rs16869430	T	C	0.5062	0.0091	0.0016	8.151e-09
Urate_ K = 21_ R2 = 7% _F = 27.88	rs11741189	T	C	0.177	-0.0087	0.0017	3.781e-07
Urate_ K = 21_ R2 = 7% _F = 27.88	rs6834270	A	G	0.0346	-0.0204	0.0045	5.219e-06
Urate_ K = 21_ R2 = 7% _F = 27.88	rs13318012	T	C	0.8378	-0.0078	0.0017	8.359e-06
Urate_ K = 21_ R2 = 7% _F = 27.88	rs12579148	T	C	0.1887	-0.0077	0.0017	5.919e-06
Urate_ K = 21_ R2 = 7% _F = 27.88	rs17246501	A	C	0.4825	-0.0181	0.0016	2.353e-30
Urate_ K = 21_ R2 = 7% _F = 27.88	rs10844317	T	G	0.1637	-0.0086	0.0018	1.122e-06
Urate_ K = 21_ R2 = 7% _F = 27.88	rs1286087	T	C	0.8367	0.0077	0.0017	8.083e-06
Urate_ K = 21_ R2 = 7% _F = 27.88	rs2231142	T	G	0.1106	0.0119	0.0024	8.428e-07
Urate_ K = 21_ R2 = 7% _F = 27.88	rs9549021	T	C	0.6112	-0.0135	0.0029	2.944e-06
Urate_ K = 21_ R2 = 7% _F = 27.88	rs16894893	A	T	0.518	-0.0075	0.0016	2.445e-06
Urate_ K = 21_ R2 = 7% _F = 27.88	rs11007082	T	G	0.3743	0.0075	0.0016	2.971e-06
Urate_ K = 21_ R2 = 7% _F = 27.88	rs6927639	A	G	0.8458	-0.0078	0.0018	9.274e-06
Urate_ K = 21_ R2 = 7% _F = 27.88	rs11130013	T	C	0.153	-0.0081	0.0018	5.094e-06
Urate_ K = 21_ R2 = 7% _F = 27.88	rs9557545	A	T	0.032	0.018	0.004	7.829e-06
Urate_ K = 21_ R2 = 7% _F = 27.88	rs233340	A	G	0.0707	-0.0125	0.0026	2.535e-06
Urate_ K = 21_ R2 = 7% _F = 27.88	rs510032	T	C	0.169	0.009	0.002	6.795e-06
Urate_ K = 21_ R2 = 7% _F = 27.88	rs17676773	A	G	0.1705	-0.0079	0.0018	5.992e-06
Urate_ K = 21_ R2 = 7% _F = 27.88	rs235322	T	G	0.1825	0.0079	0.0017	4.905e-06
Urate_ K = 21_ R2 = 7% _F = 27.88	rs10490734	A	G	0.8314	0.0077	0.0017	7.935e-06
Urate_ K = 21_ R2 = 7% _F = 27.88	rs872114	A	C	0.9736	-0.0208	0.0044	2.294e-06
Urate_ K = 21_ R2 = 7% _F = 27.88	rs16953268	A	C	0.0689	-0.0115	0.0026	7.726e-06
Ursodeoxycholate Number of SNPs: 11 Variation explained (R2): 2.9% F statistic: 21.2	rs7463380	C	G	0.8421	0.0763	0.0169	6.402e-06
Ursodeoxycholate_ K = 11_ R2 = 2.9% _F = 21.2	rs7255072	A	G	0.4436	0.0539	0.0122	9.882e-06
Ursodeoxycholate_ K = 11_ R2 = 2.9% _F = 21.2	rs1952212	A	G	0.4586	0.029	0.0062	3.57e-06
Ursodeoxycholate_ K = 11_ R2 = 2.9% _F = 21.2	rs12880160	C	G	0.117	0.0431	0.0096	7.361e-06
Ursodeoxycholate_ K = 11_ R2 = 2.9% _F = 21.2	rs312306	C	G	0.2278	-0.0654	0.0145	6.231e-06
Ursodeoxycholate_ K = 11_ R2 = 2.9% _F = 21.2	rs2720445	T	C	0.536	0.033	0.0073	5.56e-06
Ursodeoxycholate_ K = 11_ R2 = 2.9% _F = 21.2	rs9573265	T	C	0.0158	0.2216	0.0488	5.552e-06
Ursodeoxycholate_ K = 11_ R2 = 2.9% _F = 21.2	rs2421668	A	G	0.644	0.034	0.0073	2.867e-06
Ursodeoxycholate_ K = 11_ R2 = 2.9% _F = 21.2	rs10174534	A	G	0.5571	-0.028	0.0063	7.572e-06
Ursodeoxycholate_ K = 11_ R2 = 2.9% _F = 21.2	rs11736497	T	C	0.0214	0.1146	0.0252	5.557e-06
Ursodeoxycholate_ K = 11_ R2 = 2.9% _F = 21.2	rs6763802	T	G	0.0798	-0.0576	0.0116	6.503e-07
Arginine Number of SNPs: 21 Variation explained (R2): 5.6% F statistic: 21.87	rs7717247	A	C	0.8061	0.0162	0.0035	3.347e-06
Arginine_ K = 21_ R2 = 5.6% _F = 21.87	rs10921131	T	C	0.1663	-0.0137	0.0031	7.915e-06
Arginine_ K = 21_ R2 = 5.6% _F = 21.87	rs12714263	A	G	0.5733	-0.0107	0.0023	3.976e-06
Arginine_ K = 21_ R2 = 5.6% _F = 21.87	rs2916142	T	C	0.4551	-0.0101	0.0023	9.376e-06
Arginine_ K = 21_ R2 = 5.6% _F = 21.87	rs3011362	A	G	0.0334	-0.0349	0.0074	2.37e-06
Arginine_ K = 21_ R2 = 5.6% _F = 21.87	rs837763	T	C	0.5528	0.0114	0.0025	6.027e-06
Arginine_ K = 21_ R2 = 5.6% _F = 21.87	rs4984288	T	C	0.6191	-0.0104	0.0023	6.594e-06
Arginine_ K = 21_ R2 = 5.6% _F = 21.87	rs720118	T	C	0.6152	-0.0105	0.0023	4.547e-06
Arginine_ K = 21_ R2 = 5.6% _F = 21.87	rs7036499	T	C	0.8519	0.0217	0.0049	8.857e-06
Arginine_ K = 21_ R2 = 5.6% _F = 21.87	rs6920504	T	C	0.7729	-0.0135	0.003	7.527e-06
Arginine_ K = 21_ R2 = 5.6% _F = 21.87	rs4242998	A	T	0.4709	-0.0107	0.0023	3.099e-06
Arginine_ K = 21_ R2 = 5.6% _F = 21.87	rs2933871	A	G	0.6938	0.0178	0.004	7.648e-06
Arginine_ K = 21_ R2 = 5.6% _F = 21.87	rs12985777	T	C	0.2402	-0.0141	0.0032	8.861e-06
Arginine_ K = 21_ R2 = 5.6% _F = 21.87	rs6141934	A	G	0.6403	-0.0104	0.0023	7.231e-06
Arginine_ K = 21_ R2 = 5.6% _F = 21.87	rs10922038	T	C	0.4354	0.0102	0.0023	7.569e-06
Arginine_ K = 21_ R2 = 5.6% _F = 21.87	rs11114987	T	C	0.0439	-0.0324	0.0067	1.414e-06
Arginine_ K = 21_ R2 = 5.6% _F = 21.87	rs6479442	A	C	0.4837	0.0101	0.0023	9.586e-06
Arginine_ K = 21_ R2 = 5.6% _F = 21.87	rs511304	A	C	0.4368	0.0191	0.0039	1.014e-06
Arginine_ K = 21_ R2 = 5.6% _F = 21.87	rs1153903	A	G	0.3856	-0.0106	0.0023	4.187e-06
Arginine_ K = 21_ R2 = 5.6% _F = 21.87	rs2965214	A	G	0.6337	0.0105	0.0023	7.043e-06
Arginine_ K = 21_ R2 = 5.6% _F = 21.87	rs2246012	T	C	0.8388	-0.0166	0.0032	2.227e-07
Arginine_ K = 21_ R2 = 5.6% _F = 21.87	rs715	T	C	0.7064	0.0144	0.0028	2.902e-07
Ascorbate (Vitamin C) Number of SNPs: 13 Variation explained (R2): 3.6% F statistic: 22.51	rs4305517	T	C	0.9608	0.1327	0.0285	3.134e-06
Ascorbate (Vitamin C)_ K = 13_ R2 = 3.6% _F = 22.51	rs2070006	T	C	0.3713	0.0512	0.0112	4.762e-06
Ascorbate (Vitamin C)_ K = 13_ R2 = 3.6% _F = 22.51	rs577596	A	G	0.3267	-0.0567	0.0114	6.679e-07
Ascorbate (Vitamin C)_ K = 13_ R2 = 3.6% _F = 22.51	rs8057559	T	C	0.0312	0.1395	0.0314	9.098e-06
Ascorbate (Vitamin C)_ K = 13_ R2 = 3.6% _F = 22.51	rs13103690	T	G	0.5359	-0.0474	0.0104	5.195e-06
Ascorbate (Vitamin C)_ K = 13_ R2 = 3.6% _F = 22.51	rs9419004	C	G	0.186	-0.254	0.0563	6.531e-06
Ascorbate (Vitamin C)_ K = 13_ R2 = 3.6% _F = 22.51	rs13069990	T	C	0.3781	-0.0506	0.011	4.442e-06
Ascorbate (Vitamin C)_ K = 13_ R2 = 3.6% _F = 22.51	rs17050031	T	C	0.4741	-0.0522	0.0108	1.34e-06
Ascorbate (Vitamin C)_ K = 13_ R2 = 3.6% _F = 22.51	rs11167905	T	C	0.8545	0.0804	0.0164	9.826e-07
Ascorbate (Vitamin C)_ K = 13_ R2 = 3.6% _F = 22.51	rs808686	A	G	0.6086	0.0598	0.0128	3.013e-06
Ascorbate (Vitamin C)_ K = 13_ R2 = 3.6% _F = 22.51	rs7258148	A	G	0.1556	-0.069	0.0148	2.979e-06
Ascorbate (Vitamin C)_ K = 13_ R2 = 3.6% _F = 22.51	rs7112460	T	C	0.0658	0.1084	0.0223	1.135e-06
Ascorbate (Vitamin C)_ K = 13_ R2 = 3.6% _F = 22.51	rs6834631	T	G	0.9596	0.1306	0.0267	1.032e-06
Ascorbate (Vitamin C)_ K = 13_ R2 = 3.6% _F = 22.51	rs9606290	A	G	0.241	0.159	0.0352	6.316e-06
Heptanoate (7:0) Number of SNPs: 33 Variation explained (R2): 8.8% F statistic: 22.88	rs2291199	A	G	0.5373	0.0083	0.0018	5.175e-06
Heptanoate (7:0)_ K = 33_ R2 = 8.8% _F = 22.88	rs4798896	A	G	0.6652	0.0111	0.0025	5.736e-06
Heptanoate (7:0)_ K = 33_ R2 = 8.8% _F = 22.88	rs1836862	A	C	0.6051	-0.008	0.0018	9.366e-06
Heptanoate (7:0)_ K = 33_ R2 = 8.8% _F = 22.88	rs9607028	T	G	0.4268	-0.0084	0.0019	7.286e-06
Heptanoate (7:0)_ K = 33_ R2 = 8.8% _F = 22.88	rs676094	A	G	0.4178	0.0191	0.0042	6.606e-06
Heptanoate (7:0)_ K = 33_ R2 = 8.8% _F = 22.88	rs579025	A	G	0.5844	0.0081	0.0018	7.361e-06
Heptanoate (7:0)_ K = 33_ R2 = 8.8% _F = 22.88	rs10186579	A	G	0.2516	-0.0115	0.0026	7.098e-06
Heptanoate (7:0)_ K = 33_ R2 = 8.8% _F = 22.88	rs4618485	A	G	0.595	-0.0085	0.0018	3.037e-06
Heptanoate (7:0)_ K = 33_ R2 = 8.8% _F = 22.88	rs2147618	A	C	0.5044	-0.0082	0.0018	6.774e-06
Heptanoate (7:0)_ K = 33_ R2 = 8.8% _F = 22.88	rs1527442	C	G	0.4603	0.0095	0.0018	1.173e-07
Heptanoate (7:0)_ K = 33_ R2 = 8.8% _F = 22.88	rs864428	T	C	0.4058	0.0101	0.0018	2.986e-08
Heptanoate (7:0)_ K = 33_ R2 = 8.8% _F = 22.88	rs7436874	T	C	0.6135	0.0083	0.0019	9.886e-06
Heptanoate (7:0)_ K = 33_ R2 = 8.8% _F = 22.88	rs203591	T	C	0.3697	-0.0086	0.0018	2.014e-06
Heptanoate (7:0)_ K = 33_ R2 = 8.8% _F = 22.88	rs673092	A	C	0.4733	0.0087	0.0018	1.53e-06
Heptanoate (7:0)_ K = 33_ R2 = 8.8% _F = 22.88	rs1889463	T	C	0.628	0.0089	0.0019	3.358e-06
Heptanoate (7:0)_ K = 33_ R2 = 8.8% _F = 22.88	rs13083714	T	C	0.5762	0.0194	0.0042	4.84e-06
Heptanoate (7:0)_ K = 33_ R2 = 8.8% _F = 22.88	rs990054	T	C	0.5955	-0.0087	0.0018	1.325e-06
Heptanoate (7:0)_ K = 33_ R2 = 8.8% _F = 22.88	rs4762663	A	G	0.8495	-0.0127	0.0027	2.108e-06
Heptanoate (7:0)_ K = 33_ R2 = 8.8% _F = 22.88	rs11780452	T	C	0.5832	-0.0081	0.0018	6.76e-06
Heptanoate (7:0)_ K = 33_ R2 = 8.8% _F = 22.88	rs2910949	T	G	0.648	-0.0085	0.0018	3.233e-06
Heptanoate (7:0)_ K = 33_ R2 = 8.8% _F = 22.88	rs13109093	A	C	0.614	0.0085	0.0018	4.247e-06
Heptanoate (7:0)_ K = 33_ R2 = 8.8% _F = 22.88	rs13268221	T	C	0.531	-0.0087	0.0018	1.446e-06
Heptanoate (7:0)_ K = 33_ R2 = 8.8% _F = 22.88	rs1866411	A	C	0.3473	-0.0083	0.0018	5.232e-06
Heptanoate (7:0)_ K = 33_ R2 = 8.8% _F = 22.88	rs10848196	A	G	0.5584	-0.0098	0.0018	5.252e-08
Heptanoate (7:0)_ K = 33_ R2 = 8.8% _F = 22.88	rs6860349	A	G	0.4108	-0.0089	0.0018	8.673e-07
Heptanoate (7:0)_ K = 33_ R2 = 8.8% _F = 22.88	rs382666	T	C	0.4803	-0.0083	0.0018	4.268e-06
Heptanoate (7:0)_ K = 33_ R2 = 8.8% _F = 22.88	rs11932254	C	G	0.434	0.0081	0.0018	7.619e-06
Heptanoate (7:0)_ K = 33_ R2 = 8.8% _F = 22.88	rs10951044	T	C	0.5414	0.0081	0.0018	7.12e-06
Heptanoate (7:0)_ K = 33_ R2 = 8.8% _F = 22.88	rs8079173	A	G	0.1402	0.0118	0.0026	8.927e-06
Heptanoate (7:0)_ K = 33_ R2 = 8.8% _F = 22.88	rs2073805	T	C	0.407	-0.009	0.002	6.795e-06
Heptanoate (7:0)_ K = 33_ R2 = 8.8% _F = 22.88	rs269194	A	C	0.4386	-0.0081	0.0018	9.008e-06
Heptanoate (7:0)_ K = 33_ R2 = 8.8% _F = 22.88	rs6051643	A	G	0.986	0.0441	0.0095	3.759e-06
Heptanoate (7:0)_ K = 33_ R2 = 8.8% _F = 22.88	rs10740323	T	C	0.5935	0.0084	0.0018	4.096e-06
Heptanoate (7:0)_ K = 33_ R2 = 8.8% _F = 22.88	rs17002476	T	C	0.1459	-0.0119	0.0027	8.317e-06
Heptanoate (7:0)_ K = 33_ R2 = 8.8% _F = 22.88	rs4148926	C	G	0.5744	-0.008	0.0018	8.686e-06
Heptanoate (7:0)_ K = 33_ R2 = 8.8% _F = 22.88	rs17739107	A	G	0.942	-0.0198	0.0044	8.091e-06
Heptanoate (7:0)_ K = 33_ R2 = 8.8% _F = 22.88	rs1938479	T	C	0.6447	-0.0091	0.0018	5.907e-07
Laurate (12:0) Number of SNPs: 41 Variation explained (R2): 10.6% F statistic: 22.4	rs2140495	T	C	0.0158	0.0638	0.0144	9.505e-06
Laurate (12:0)_ K = 41_ R2 = 10.6% _F = 22.4	rs6765113	T	C	0.5408	0.0082	0.0018	8.162e-06
Laurate (12:0)_ K = 41_ R2 = 10.6% _F = 22.4	rs3792574	A	G	0.5176	0.0078	0.0018	9.207e-06
Laurate (12:0)_ K = 41_ R2 = 10.6% _F = 22.4	rs11857879	T	G	0.1952	0.0112	0.0025	8.18e-06
Laurate (12:0)_ K = 41_ R2 = 10.6% _F = 22.4	rs6112257	A	G	0.6843	-0.0092	0.0018	3.386e-07
Laurate (12:0)_ K = 41_ R2 = 10.6% _F = 22.4	rs13393013	A	G	0.0213	0.0314	0.0065	1.312e-06
Laurate (12:0)_ K = 41_ R2 = 10.6% _F = 22.4	rs13134358	T	C	0.3069	0.0079	0.0018	9.344e-06
Laurate (12:0)_ K = 41_ R2 = 10.6% _F = 22.4	rs12862464	T	C	0.0842	0.0146	0.0033	9.825e-06
Laurate (12:0)_ K = 41_ R2 = 10.6% _F = 22.4	rs11589855	T	C	0.3809	-0.0084	0.0018	2.222e-06
Laurate (12:0)_ K = 41_ R2 = 10.6% _F = 22.4	rs369895	A	G	0.574	-0.0114	0.0023	1.075e-06
Laurate (12:0)_ K = 41_ R2 = 10.6% _F = 22.4	rs4360277	T	C	0.5471	0.0079	0.0018	8.014e-06
Laurate (12:0)_ K = 41_ R2 = 10.6% _F = 22.4	rs287276	A	G	0.3317	0.0084	0.0018	2.647e-06
Laurate (12:0)_ K = 41_ R2 = 10.6% _F = 22.4	rs4744660	A	C	0.5849	0.008	0.0018	6.21e-06
Laurate (12:0)_ K = 41_ R2 = 10.6% _F = 22.4	rs9852606	C	G	0.3771	-0.0085	0.0018	1.476e-06
Laurate (12:0)_ K = 41_ R2 = 10.6% _F = 22.4	rs2304767	A	G	0.3402	0.0091	0.0019	1.216e-06
Laurate (12:0)_ K = 41_ R2 = 10.6% _F = 22.4	rs2154163	A	G	0.4738	0.0083	0.0018	2.414e-06
Laurate (12:0)_ K = 41_ R2 = 10.6% _F = 22.4	rs2255059	T	C	0.5192	-0.008	0.0018	7.397e-06
Laurate (12:0)_ K = 41_ R2 = 10.6% _F = 22.4	rs9301779	A	C	0.5526	-0.0079	0.0018	9.149e-06
Laurate (12:0)_ K = 41_ R2 = 10.6% _F = 22.4	rs4789698	T	C	0.4508	-0.0079	0.0018	6.828e-06
Laurate (12:0)_ K = 41_ R2 = 10.6% _F = 22.4	rs699015	A	G	0.955	0.0391	0.0089	9.928e-06
Laurate (12:0)_ K = 41_ R2 = 10.6% _F = 22.4	rs4930046	A	G	0.4652	0.0088	0.0019	2.716e-06
Laurate (12:0)_ K = 41_ R2 = 10.6% _F = 22.4	rs7534803	T	C	0.2945	-0.008	0.0018	8.056e-06
Laurate (12:0)_ K = 41_ R2 = 10.6% _F = 22.4	rs11128264	T	C	0.5104	0.008	0.0018	4.762e-06
Laurate (12:0)_ K = 41_ R2 = 10.6% _F = 22.4	rs6502896	A	G	0.7619	-0.0187	0.0042	9.701e-06
Laurate (12:0)_ K = 41_ R2 = 10.6% _F = 22.4	rs2491274	A	G	0.9732	-0.0297	0.0065	4.627e-06
Laurate (12:0)_ K = 41_ R2 = 10.6% _F = 22.4	rs16990450	T	C	0.0722	0.0161	0.0035	4.178e-06
Laurate (12:0)_ K = 41_ R2 = 10.6% _F = 22.4	rs11731117	A	G	0.5958	0.0081	0.0018	4.324e-06
Laurate (12:0)_ K = 41_ R2 = 10.6% _F = 22.4	rs891531	T	G	0.1846	0.0113	0.0024	3.809e-06
Laurate (12:0)_ K = 41_ R2 = 10.6% _F = 22.4	rs10039731	A	G	0.5787	0.0198	0.004	8.465e-07
Laurate (12:0)_ K = 41_ R2 = 10.6% _F = 22.4	rs12466053	A	G	0.402	0.0087	0.0018	8.441e-07
Laurate (12:0)_ K = 41_ R2 = 10.6% _F = 22.4	rs11036901	A	G	0.433	-0.0079	0.0018	7.855e-06
Laurate (12:0)_ K = 41_ R2 = 10.6% _F = 22.4	rs2423542	A	G	0.8036	0.0153	0.0032	1.914e-06
Laurate (12:0)_ K = 41_ R2 = 10.6% _F = 22.4	rs16942446	A	G	0.0314	-0.0259	0.0056	3.318e-06
Laurate (12:0)_ K = 41_ R2 = 10.6% _F = 22.4	rs1530439	T	G	0.2946	0.009	0.0018	6.08e-07
Laurate (12:0)_ K = 41_ R2 = 10.6% _F = 22.4	rs701639	A	G	0.6063	0.0084	0.0018	2.217e-06
Laurate (12:0)_ K = 41_ R2 = 10.6% _F = 22.4	rs12940605	A	C	0.6059	-0.0096	0.0018	1.823e-07
Laurate (12:0)_ K = 41_ R2 = 10.6% _F = 22.4	rs4309677	T	C	0.4924	-0.0082	0.0018	3.231e-06
Laurate (12:0)_ K = 41_ R2 = 10.6% _F = 22.4	rs2240350	A	G	0.37	0.0084	0.0018	1.891e-06
Laurate (12:0)_ K = 41_ R2 = 10.6% _F = 22.4	rs11193635	T	C	0.6725	0.0084	0.0018	3.797e-06
Laurate (12:0)_ K = 41_ R2 = 10.6% _F = 22.4	rs4680878	T	G	0.6552	0.0079	0.0018	9.163e-06
Laurate (12:0)_ K = 41_ R2 = 10.6% _F = 22.4	rs853907	T	C	0.4778	0.0079	0.0018	7.637e-06
Laurate (12:0)_ K = 41_ R2 = 10.6% _F = 22.4	rs11133486	T	G	0.2829	-0.0085	0.0018	2.052e-06
Valine Number of SNPs: 5 Variation explained (R2): 1.6% F statistic: 25.53	rs10050054	T	C	0.9828	-0.0336	0.0072	3.177e-06
Valine_ K = 5_ R2 = 1.6% _F = 25.53	rs3762466	T	C	0.6819	0.0058	0.0012	1.063e-06
Valine_ K = 5_ R2 = 1.6% _F = 25.53	rs10181551	A	G	0.296	-0.0055	0.0012	3.876e-06
Valine_ K = 5_ R2 = 1.6% _F = 25.53	rs4879407	A	G	0.6961	0.0057	0.0012	2.674e-06
Valine_ K = 5_ R2 = 1.6% _F = 25.53	rs6841731	A	G	0.52	0.0074	0.0012	2.228e-10
Valine_ K = 5_ R2 = 1.6% _F = 25.53	rs2373642	A	G	0.0138	-0.054	0.011	9.775e-07
Urea Number of SNPs: 14 Variation explained (R2): 3.7% F statistic: 21.54	rs2424200	T	C	0.1163	0.0152	0.0034	6.428e-06
Urea_ K = 14_ R2 = 3.7% _F = 21.54	rs980922	C	G	0.8056	-0.012	0.0026	3.569e-06
Urea_ K = 14_ R2 = 3.7% _F = 21.54	rs1569823	T	C	0.8757	-0.0152	0.0034	8.248e-06
Urea_ K = 14_ R2 = 3.7% _F = 21.54	rs12654812	A	G	0.2913	0.0118	0.0025	3.362e-06
Urea_ K = 14_ R2 = 3.7% _F = 21.54	rs1792544	A	G	0.8963	-0.0155	0.0034	5.829e-06
Urea_ K = 14_ R2 = 3.7% _F = 21.54	rs2049664	C	G	0.1916	0.0123	0.0026	3.006e-06
Urea_ K = 14_ R2 = 3.7% _F = 21.54	rs686346	T	C	0.7658	0.0128	0.0027	1.443e-06
Urea_ K = 14_ R2 = 3.7% _F = 21.54	rs16872888	T	C	0.0332	-0.0292	0.0066	9.894e-06
Urea_ K = 14_ R2 = 3.7% _F = 21.54	rs7998814	T	C	0.1839	0.012	0.0026	5.343e-06
Urea_ K = 14_ R2 = 3.7% _F = 21.54	rs7739842	T	G	0.8202	0.0134	0.0027	8.001e-07
Urea_ K = 14_ R2 = 3.7% _F = 21.54	rs2170700	A	G	0.8663	0.0326	0.0069	2.431e-06
Urea_ K = 14_ R2 = 3.7% _F = 21.54	rs6753621	A	G	0.2183	-0.0117	0.0026	7.017e-06
Urea_ K = 14_ R2 = 3.7% _F = 21.54	rs9949837	A	G	0.948	-0.0226	0.0051	8.491e-06
Urea_ K = 14_ R2 = 3.7% _F = 21.54	rs6074893	A	C	0.7512	-0.0115	0.0026	8.524e-06
Cortisol Number of SNPs: 14 Variation explained (R2): 3.7% F statistic: 21.51	rs17721217	T	C	0.3337	-0.0149	0.0032	4.077e-06
Cortisol_ K = 14_ R2 = 3.7% _F = 21.51	rs11013837	A	T	0.2463	-0.015	0.0034	8.163e-06
Cortisol_ K = 14_ R2 = 3.7% _F = 21.51	rs7160389	T	C	0.5336	0.0141	0.0032	8.12e-06
Cortisol_ K = 14_ R2 = 3.7% _F = 21.51	rs12210538	A	G	0.8442	0.0254	0.0057	9.185e-06
Cortisol_ K = 14_ R2 = 3.7% _F = 21.51	rs17100625	A	G	0.9429	0.0309	0.0067	3.484e-06
Cortisol_ K = 14_ R2 = 3.7% _F = 21.51	rs9533798	C	G	0.3667	-0.0142	0.0032	8.363e-06
Cortisol_ K = 14_ R2 = 3.7% _F = 21.51	rs17063582	A	G	0.012	-0.1201	0.0224	8.607e-08
Cortisol_ K = 14_ R2 = 3.7% _F = 21.51	rs9446392	T	C	0.9533	-0.0331	0.0075	9.272e-06
Cortisol_ K = 14_ R2 = 3.7% _F = 21.51	rs4272978	A	C	0.7144	0.0151	0.0033	3.926e-06
Cortisol_ K = 14_ R2 = 3.7% _F = 21.51	rs11987983	T	C	0.099	-0.0457	0.0102	7.164e-06
Cortisol_ K = 14_ R2 = 3.7% _F = 21.51	rs1173842	A	G	0.567	-0.0217	0.0049	8.343e-06
Cortisol_ K = 14_ R2 = 3.7% _F = 21.51	rs1491606	A	T	0.2992	0.0182	0.004	5.796e-06
Cortisol_ K = 14_ R2 = 3.7% _F = 21.51	rs11855136	A	G	0.0406	-0.0618	0.0121	2.991e-07
Cortisol_ K = 14_ R2 = 3.7% _F = 21.51	rs1448767	T	C	0.6289	-0.0144	0.0033	9.947e-06
Cortisone Number of SNPs: 40 Variation explained (R2): 10.6% F statistic: 23.01	rs7670890	A	G	0.6344	-0.0076	0.0017	9.639e-06
Cortisone_ K = 40_ R2 = 10.6% _F = 23.01	rs7562418	A	C	0.5075	0.0077	0.0017	6.809e-06
Cortisone_ K = 40_ R2 = 10.6% _F = 23.01	rs4470135	A	C	0.5203	0.0088	0.0018	5.174e-07
Cortisone_ K = 40_ R2 = 10.6% _F = 23.01	rs4930767	T	C	0.4862	-0.0079	0.0017	3.687e-06
Cortisone_ K = 40_ R2 = 10.6% _F = 23.01	rs2351174	T	G	0.6063	-0.0081	0.0017	2.628e-06
Cortisone_ K = 40_ R2 = 10.6% _F = 23.01	rs3095571	A	G	0.4465	0.0078	0.0017	6.744e-06
Cortisone_ K = 40_ R2 = 10.6% _F = 23.01	rs1907725	T	C	0.5431	-0.0078	0.0017	4.851e-06
Cortisone_ K = 40_ R2 = 10.6% _F = 23.01	rs7837792	T	C	0.5936	-0.0081	0.0017	2.782e-06
Cortisone_ K = 40_ R2 = 10.6% _F = 23.01	rs10258594	T	C	0.5146	-0.0078	0.0017	4.896e-06
Cortisone_ K = 40_ R2 = 10.6% _F = 23.01	rs9379820	T	C	0.5914	-0.0076	0.0017	8.316e-06
Cortisone_ K = 40_ R2 = 10.6% _F = 23.01	rs2118096	A	C	0.6068	0.0084	0.0017	1.133e-06
Cortisone_ K = 40_ R2 = 10.6% _F = 23.01	rs6910731	A	G	0.4495	0.0087	0.0018	9.064e-07
Cortisone_ K = 40_ R2 = 10.6% _F = 23.01	rs1536284	T	C	0.5807	0.008	0.0017	3.003e-06
Cortisone_ K = 40_ R2 = 10.6% _F = 23.01	rs227421	T	C	0.1489	0.0116	0.0025	4.035e-06
Cortisone_ K = 40_ R2 = 10.6% _F = 23.01	rs7176387	T	C	0.3648	-0.0077	0.0017	7.02e-06
Cortisone_ K = 40_ R2 = 10.6% _F = 23.01	rs11532668	A	G	0.8339	0.0168	0.0038	9.746e-06
Cortisone_ K = 40_ R2 = 10.6% _F = 23.01	rs10102742	T	C	0.4035	0.0078	0.0018	8.73e-06
Cortisone_ K = 40_ R2 = 10.6% _F = 23.01	rs6017596	T	C	0.5825	-0.0084	0.0017	8.308e-07
Cortisone_ K = 40_ R2 = 10.6% _F = 23.01	rs10021498	C	G	0.5533	0.0087	0.0017	2.716e-07
Cortisone_ K = 40_ R2 = 10.6% _F = 23.01	rs13280205	A	C	0.805	0.0121	0.0025	2.015e-06
Cortisone_ K = 40_ R2 = 10.6% _F = 23.01	rs1341230	T	C	0.5303	0.0076	0.0017	8.82e-06
Cortisone_ K = 40_ R2 = 10.6% _F = 23.01	rs7814638	A	G	0.141	-0.0133	0.0025	1.231e-07
Cortisone_ K = 40_ R2 = 10.6% _F = 23.01	rs9674799	A	G	0.8784	0.0157	0.0032	7.465e-07
Cortisone_ K = 40_ R2 = 10.6% _F = 23.01	rs1438564	T	C	0.8089	0.0114	0.0025	5.103e-06
Cortisone_ K = 40_ R2 = 10.6% _F = 23.01	rs2074473	T	C	0.5408	0.0077	0.0017	6.672e-06
Cortisone_ K = 40_ R2 = 10.6% _F = 23.01	rs2325727	T	C	0.4423	-0.0076	0.0017	9.34e-06
Cortisone_ K = 40_ R2 = 10.6% _F = 23.01	rs757657	A	C	0.5942	0.0077	0.0017	8.002e-06
Cortisone_ K = 40_ R2 = 10.6% _F = 23.01	rs1115509	A	C	0.0138	-0.0999	0.0211	2.125e-06
Cortisone_ K = 40_ R2 = 10.6% _F = 23.01	rs7661472	A	C	0.4922	-0.0082	0.0017	1.379e-06
Cortisone_ K = 40_ R2 = 10.6% _F = 23.01	rs6539409	T	G	0.5663	-0.0078	0.0017	4.953e-06
Cortisone_ K = 40_ R2 = 10.6% _F = 23.01	rs1173830	T	C	0.6542	-0.0171	0.0034	6.602e-07
Cortisone_ K = 40_ R2 = 10.6% _F = 23.01	rs10824300	A	G	0.383	0.009	0.002	6.795e-06
Cortisone_ K = 40_ R2 = 10.6% _F = 23.01	rs2058473	A	G	0.6494	-0.0077	0.0017	7.478e-06
Cortisone_ K = 40_ R2 = 10.6% _F = 23.01	rs10755006	A	G	0.4652	0.0077	0.0017	5.769e-06
Cortisone_ K = 40_ R2 = 10.6% _F = 23.01	rs219918	C	G	0.0224	-0.0299	0.0063	2.477e-06
Cortisone_ K = 40_ R2 = 10.6% _F = 23.01	rs2272663	A	G	0.5321	0.0077	0.0017	9.389e-06
Cortisone_ K = 40_ R2 = 10.6% _F = 23.01	rs1334235	C	G	0.3644	0.0077	0.0017	9.969e-06
Cortisone_ K = 40_ R2 = 10.6% _F = 23.01	rs527793	T	G	0.1085	-0.0149	0.0033	4.668e-06
Cortisone_ K = 40_ R2 = 10.6% _F = 23.01	rs2364598	A	C	0.149	-0.014	0.003	3.061e-06
Cortisone_ K = 40_ R2 = 10.6% _F = 23.01	rs7543928	A	C	0.5568	-0.0078	0.0017	6.015e-06
Cortisone_ K = 40_ R2 = 10.6% _F = 23.01	rs17248331	T	C	0.5848	-0.0089	0.0017	1.699e-07
Proline Number of SNPs: 40 Variation explained (R2): 11.2% F statistic: 24.59	rs2935623	A	G	0.6235	-0.0079	0.0018	8.71e-06
Proline_ K = 40_ R2 = 11.2% _F = 24.59	rs175866	T	G	0.5784	-0.0086	0.0018	1.139e-06
Proline_ K = 40_ R2 = 11.2% _F = 24.59	rs6798346	A	G	0.627	-0.0167	0.0038	8.776e-06
Proline_ K = 40_ R2 = 11.2% _F = 24.59	rs893175	A	C	0.5884	-0.0086	0.0018	1.527e-06
Proline_ K = 40_ R2 = 11.2% _F = 24.59	rs2773848	A	G	0.4901	-0.0078	0.0018	9.216e-06
Proline_ K = 40_ R2 = 11.2% _F = 24.59	rs5747948	T	G	0.5351	-0.0133	0.0023	1.214e-08
Proline_ K = 40_ R2 = 11.2% _F = 24.59	rs1888182	T	C	0.4159	0.0079	0.0018	7.927e-06
Proline_ K = 40_ R2 = 11.2% _F = 24.59	rs950755	T	C	0.8596	-0.0116	0.0026	8.512e-06
Proline_ K = 40_ R2 = 11.2% _F = 24.59	rs10197940	T	C	0.5706	-0.0083	0.0018	2.589e-06
Proline_ K = 40_ R2 = 11.2% _F = 24.59	rs1615586	T	G	0.7674	-0.0196	0.0043	4.182e-06
Proline_ K = 40_ R2 = 11.2% _F = 24.59	rs9911645	T	G	0.8576	0.012	0.0027	7.145e-06
Proline_ K = 40_ R2 = 11.2% _F = 24.59	rs9360494	T	C	0.5977	-0.0083	0.0018	2.689e-06
Proline_ K = 40_ R2 = 11.2% _F = 24.59	rs13025367	C	G	0.6759	-0.0079	0.0018	7.993e-06
Proline_ K = 40_ R2 = 11.2% _F = 24.59	rs10954090	T	C	0.1522	0.013	0.0026	3.971e-07
Proline_ K = 40_ R2 = 11.2% _F = 24.59	rs11102620	T	G	0.5122	-0.0086	0.0017	8.082e-07
Proline_ K = 40_ R2 = 11.2% _F = 24.59	rs10501294	T	C	0.8715	-0.0124	0.0027	3.11e-06
Proline_ K = 40_ R2 = 11.2% _F = 24.59	rs10512634	A	G	0.1405	0.0117	0.0026	8.593e-06
Proline_ K = 40_ R2 = 11.2% _F = 24.59	rs6085110	A	G	0.973	-0.0261	0.0059	9.436e-06
Proline_ K = 40_ R2 = 11.2% _F = 24.59	rs7560860	A	G	0.4253	0.0079	0.0018	6.427e-06
Proline_ K = 40_ R2 = 11.2% _F = 24.59	rs6768136	T	G	0.6045	0.0082	0.0018	3.056e-06
Proline_ K = 40_ R2 = 11.2% _F = 24.59	rs11183677	A	G	0.4768	0.0082	0.0018	3.175e-06
Proline_ K = 40_ R2 = 11.2% _F = 24.59	rs9540462	T	G	0.8756	-0.012	0.0026	4.797e-06
Proline_ K = 40_ R2 = 11.2% _F = 24.59	rs5747998	C	G	0.1015	0.022	0.0036	1.277e-09
Proline_ K = 40_ R2 = 11.2% _F = 24.59	rs4819778	T	C	0.3319	-0.0097	0.0018	5.503e-08
Proline_ K = 40_ R2 = 11.2% _F = 24.59	rs11781468	T	C	0.2067	0.0116	0.0025	3.973e-06
Proline_ K = 40_ R2 = 11.2% _F = 24.59	rs7029664	T	C	0.5057	0.0077	0.0017	9.66e-06
Proline_ K = 40_ R2 = 11.2% _F = 24.59	rs535633	A	G	0.5847	-0.0086	0.0018	1.049e-06
Proline_ K = 40_ R2 = 11.2% _F = 24.59	rs12243290	A	G	0.8997	-0.0157	0.0034	4e-06
Proline_ K = 40_ R2 = 11.2% _F = 24.59	rs11912325	A	C	0.5976	-0.0188	0.0024	2.646e-15
Proline_ K = 40_ R2 = 11.2% _F = 24.59	rs2238754	T	C	0.083	-0.017	0.0036	2.571e-06
Proline_ K = 40_ R2 = 11.2% _F = 24.59	rs2241305	A	G	0.9172	-0.0696	0.008	2.974e-18
Proline_ K = 40_ R2 = 11.2% _F = 24.59	rs11963846	A	T	0.4468	0.008	0.0018	8.573e-06
Proline_ K = 40_ R2 = 11.2% _F = 24.59	rs1875472	T	C	0.8762	0.0243	0.0055	8.71e-06
Proline_ K = 40_ R2 = 11.2% _F = 24.59	rs10747856	A	G	0.5243	-0.0079	0.0017	6.032e-06
Proline_ K = 40_ R2 = 11.2% _F = 24.59	rs6769362	C	G	0.6423	-0.0079	0.0018	7.756e-06
Proline_ K = 40_ R2 = 11.2% _F = 24.59	rs372579	A	G	0.5901	0.0156	0.0031	6.856e-07
Proline_ K = 40_ R2 = 11.2% _F = 24.59	rs4580644	T	C	0.4937	0.0157	0.0035	8.163e-06
Proline_ K = 40_ R2 = 11.2% _F = 24.59	rs4978836	A	G	0.391	0.009	0.002	6.795e-06
Proline_ K = 40_ R2 = 11.2% _F = 24.59	rs6904434	A	G	0.0784	-0.0165	0.0034	1.162e-06
Proline_ K = 40_ R2 = 11.2% _F = 24.59	rs7858706	T	C	0.4952	-0.0077	0.0017	9.664e-06
Proline_ K = 40_ R2 = 11.2% _F = 24.59	rs1544197	A	G	0.5406	0.0079	0.0018	6.821e-06
Proline_ K = 40_ R2 = 11.2% _F = 24.59	rs7187836	T	G	0.6336	-0.008	0.0018	6.769e-06
Citrulline Number of SNPs: 45 Variation explained (R2): 11.8% F statistic: 23.02	rs7597477	A	G	0.9327	-0.0155	0.0034	6.797e-06
Citrulline_ K = 45_ R2 = 11.8% _F = 23.02	rs6978828	T	C	0.6017	-0.0084	0.0017	1.115e-06
Citrulline_ K = 45_ R2 = 11.8% _F = 23.02	rs11243372	A	G	0.5474	0.0087	0.0017	4.333e-07
Citrulline_ K = 45_ R2 = 11.8% _F = 23.02	rs6889120	T	C	0.9378	-0.034	0.0076	7.436e-06
Citrulline_ K = 45_ R2 = 11.8% _F = 23.02	rs1437588	A	G	0.479	0.0078	0.0018	7.672e-06
Citrulline_ K = 45_ R2 = 11.8% _F = 23.02	rs554710	T	C	0.7074	-0.0084	0.0018	1.587e-06
Citrulline_ K = 45_ R2 = 11.8% _F = 23.02	rs749049	A	T	0.4924	-0.0104	0.0017	1.173e-09
Citrulline_ K = 45_ R2 = 11.8% _F = 23.02	rs1511587	A	G	0.4464	0.0076	0.0017	9.09e-06
Citrulline_ K = 45_ R2 = 11.8% _F = 23.02	rs6994363	A	G	0.8662	-0.0121	0.0026	2.495e-06
Citrulline_ K = 45_ R2 = 11.8% _F = 23.02	rs2350885	A	T	0.3481	-0.0079	0.0018	8.717e-06
Citrulline_ K = 45_ R2 = 11.8% _F = 23.02	rs6510448	T	G	0.6691	0.0077	0.0017	8.14e-06
Citrulline_ K = 45_ R2 = 11.8% _F = 23.02	rs12147171	C	G	0.1169	-0.0118	0.0026	4.758e-06
Citrulline_ K = 45_ R2 = 11.8% _F = 23.02	rs6040877	A	G	0.2715	-0.0081	0.0018	4.01e-06
Citrulline_ K = 45_ R2 = 11.8% _F = 23.02	rs10933740	C	G	0.3536	0.0078	0.0017	6.595e-06
Citrulline_ K = 45_ R2 = 11.8% _F = 23.02	rs11244238	T	C	0.5574	-0.0085	0.0017	7.449e-07
Citrulline_ K = 45_ R2 = 11.8% _F = 23.02	rs12342692	A	G	0.6538	0.008	0.0017	4.864e-06
Citrulline_ K = 45_ R2 = 11.8% _F = 23.02	rs779463	T	G	0.3012	-0.0077	0.0017	9.458e-06
Citrulline_ K = 45_ R2 = 11.8% _F = 23.02	rs6936254	A	G	0.7006	0.0078	0.0017	8.523e-06
Citrulline_ K = 45_ R2 = 11.8% _F = 23.02	rs17142889	T	G	0.1339	0.0111	0.0025	9.909e-06
Citrulline_ K = 45_ R2 = 11.8% _F = 23.02	rs8032153	T	C	0.6266	-0.0078	0.0017	6.929e-06
Citrulline_ K = 45_ R2 = 11.8% _F = 23.02	rs13208172	T	C	0.9562	0.0216	0.0049	9.915e-06
Citrulline_ K = 45_ R2 = 11.8% _F = 23.02	rs229084	A	G	0.4727	-0.0077	0.0017	6.574e-06
Citrulline_ K = 45_ R2 = 11.8% _F = 23.02	rs10858075	T	C	0.4061	-0.0091	0.0017	1.124e-07
Citrulline_ K = 45_ R2 = 11.8% _F = 23.02	rs7144152	A	G	0.6839	0.0086	0.0018	9.955e-07
Citrulline_ K = 45_ R2 = 11.8% _F = 23.02	rs310101	A	G	0.9579	0.0367	0.0079	3.86e-06
Citrulline_ K = 45_ R2 = 11.8% _F = 23.02	rs17821771	T	G	0.3485	-0.0082	0.0017	1.917e-06
Citrulline_ K = 45_ R2 = 11.8% _F = 23.02	rs13267180	A	G	0.4794	0.0081	0.0017	3.775e-06
Citrulline_ K = 45_ R2 = 11.8% _F = 23.02	rs13105113	A	C	0.8769	0.0114	0.0026	9.176e-06
Citrulline_ K = 45_ R2 = 11.8% _F = 23.02	rs9354336	T	C	0.8733	0.0113	0.0025	8.569e-06
Citrulline_ K = 45_ R2 = 11.8% _F = 23.02	rs16839094	T	C	0.6666	0.0082	0.0017	2.004e-06
Citrulline_ K = 45_ R2 = 11.8% _F = 23.02	rs12150046	A	G	0.6821	-0.008	0.0017	3.852e-06
Citrulline_ K = 45_ R2 = 11.8% _F = 23.02	rs758186	T	C	0.6536	-0.0077	0.0017	8.687e-06
Citrulline_ K = 45_ R2 = 11.8% _F = 23.02	rs2506864	T	G	0.4103	-0.0076	0.0017	8.81e-06
Citrulline_ K = 45_ R2 = 11.8% _F = 23.02	rs7077566	A	G	0.5629	0.0079	0.0017	4.656e-06
Citrulline_ K = 45_ R2 = 11.8% _F = 23.02	rs539904	A	G	0.7056	-0.0086	0.0018	1.507e-06
Citrulline_ K = 45_ R2 = 11.8% _F = 23.02	rs3797254	A	G	0.7277	-0.0089	0.0018	5.256e-07
Citrulline_ K = 45_ R2 = 11.8% _F = 23.02	rs10477454	T	C	0.0169	-0.0374	0.0082	4.645e-06
Citrulline_ K = 45_ R2 = 11.8% _F = 23.02	rs11993007	A	G	0.3167	-0.0127	0.0028	5.239e-06
Citrulline_ K = 45_ R2 = 11.8% _F = 23.02	rs2487410	T	C	0.4696	-0.0081	0.0017	1.841e-06
Citrulline_ K = 45_ R2 = 11.8% _F = 23.02	rs10504742	A	T	0.5543	-0.0081	0.0017	2.585e-06
Citrulline_ K = 45_ R2 = 11.8% _F = 23.02	rs172139	A	G	0.6401	0.0083	0.0017	1.548e-06
Citrulline_ K = 45_ R2 = 11.8% _F = 23.02	rs7603241	A	G	0.469	-0.0089	0.0017	1.915e-07
Citrulline_ K = 45_ R2 = 11.8% _F = 23.02	rs10489008	A	C	0.4919	-0.0076	0.0017	7.369e-06
Citrulline_ K = 45_ R2 = 11.8% _F = 23.02	rs16841570	T	C	0.9726	0.0248	0.0056	8.589e-06
Citrulline_ K = 45_ R2 = 11.8% _F = 23.02	rs2887915	T	C	0.3264	0.0081	0.0017	3.31e-06
Citrulline_ K = 45_ R2 = 11.8% _F = 23.02	rs11119951	T	C	0.1175	0.0119	0.0026	4.358e-06
Citrulline_ K = 45_ R2 = 11.8% _F = 23.02	rs7137439	A	C	0.4761	0.0076	0.0017	8.827e-06
Citrulline_ K = 45_ R2 = 11.8% _F = 23.02	rs9824791	A	G	0.4822	0.0079	0.0017	5.987e-06
Citrulline_ K = 45_ R2 = 11.8% _F = 23.02	rs10246100	A	T	0.4362	0.0084	0.0017	1.128e-06
Biliverdin Number of SNPs: 30 Variation explained (R2): 12.1% F statistic: 35.63	rs1597944	T	C	0.535	0.045	0.004	2.316e-29
Biliverdin_ K = 30_ R2 = 12.1% _F = 35.63	rs1417663	A	T	0.0102	0.2239	0.0484	3.703e-06
Biliverdin_ K = 30_ R2 = 12.1% _F = 35.63	rs7440035	T	G	0.7877	-0.0405	0.0091	9.286e-06
Biliverdin_ K = 30_ R2 = 12.1% _F = 35.63	rs10203853	A	T	0.4996	0.0314	0.0035	6.92e-19
Biliverdin_ K = 30_ R2 = 12.1% _F = 35.63	rs12615708	A	G	0.0251	0.0591	0.0124	1.944e-06
Biliverdin_ K = 30_ R2 = 12.1% _F = 35.63	rs17864714	A	G	0.0342	0.0523	0.0117	8.407e-06
Biliverdin_ K = 30_ R2 = 12.1% _F = 35.63	rs28948069	C	G	0.8649	-0.0317	0.006	1.045e-07
Biliverdin_ K = 30_ R2 = 12.1% _F = 35.63	rs838736	A	G	0.5545	0.0168	0.0035	2.143e-06
Biliverdin_ K = 30_ R2 = 12.1% _F = 35.63	rs7045137	A	G	0.3947	-0.0169	0.0037	3.995e-06
Biliverdin_ K = 30_ R2 = 12.1% _F = 35.63	rs6503066	T	C	0.0984	0.0317	0.0065	9.488e-07
Biliverdin_ K = 30_ R2 = 12.1% _F = 35.63	rs6832170	A	G	0.2272	0.022	0.0044	6.239e-07
Biliverdin_ K = 30_ R2 = 12.1% _F = 35.63	rs4047198	C	G	0.1175	-0.035	0.0072	1.174e-06
Biliverdin_ K = 30_ R2 = 12.1% _F = 35.63	rs3796090	T	C	0.8929	-0.0386	0.0059	8.279e-11
Biliverdin_ K = 30_ R2 = 12.1% _F = 35.63	rs1823803	T	C	0.4584	-0.0429	0.0036	5.12e-33
Biliverdin_ K = 30_ R2 = 12.1% _F = 35.63	rs2349945	T	C	0.3863	-0.0347	0.0077	7.253e-06
Biliverdin_ K = 30_ R2 = 12.1% _F = 35.63	rs2669869	A	C	0.7946	0.0195	0.0044	9.676e-06
Biliverdin_ K = 30_ R2 = 12.1% _F = 35.63	rs17868378	A	C	0.932	-0.034	0.0075	6.487e-06
Biliverdin_ K = 30_ R2 = 12.1% _F = 35.63	rs4738000	A	T	0.5626	0.0174	0.0036	1.16e-06
Biliverdin_ K = 30_ R2 = 12.1% _F = 35.63	rs6716168	T	C	0.6444	-0.0199	0.0042	1.908e-06
Biliverdin_ K = 30_ R2 = 12.1% _F = 35.63	rs6837370	A	G	0.1004	0.0645	0.0122	1.149e-07
Biliverdin_ K = 30_ R2 = 12.1% _F = 35.63	rs12371604	T	C	0.7709	-0.0205	0.0043	2.18e-06
Biliverdin_ K = 30_ R2 = 12.1% _F = 35.63	rs12496969	A	G	0.7844	0.0202	0.0044	4.279e-06
Biliverdin_ K = 30_ R2 = 12.1% _F = 35.63	rs4944238	A	G	0.8712	-0.0241	0.0053	4.882e-06
Biliverdin_ K = 30_ R2 = 12.1% _F = 35.63	rs11563248	T	G	0.4503	-0.0191	0.0036	1.44e-07
Biliverdin_ K = 30_ R2 = 12.1% _F = 35.63	rs741382	T	C	0.2234	-0.0472	0.0093	3.742e-07
Biliverdin_ K = 30_ R2 = 12.1% _F = 35.63	rs6714486	A	T	0.0627	-0.0559	0.0082	7.667e-12
Biliverdin_ K = 30_ R2 = 12.1% _F = 35.63	rs4129945	A	G	0.9681	0.0488	0.0106	4.418e-06
Biliverdin_ K = 30_ R2 = 12.1% _F = 35.63	rs4964090	A	G	0.5654	-0.019	0.0036	1.176e-07
Biliverdin_ K = 30_ R2 = 12.1% _F = 35.63	rs280194	T	C	0.7311	-0.0197	0.0043	5.766e-06
Biliverdin_ K = 30_ R2 = 12.1% _F = 35.63	rs28900371	A	G	0.0352	0.089	0.01	7.653e-19
Biliverdin_ K = 30_ R2 = 12.1% _F = 35.63	rs1019595	T	C	0.9326	-0.0345	0.0076	5.463e-06
Biliverdin_ K = 30_ R2 = 12.1% _F = 35.63	rs10899375	T	C	0.4363	-0.0359	0.0079	4.903e-06
Serotonin (5Ht) Number of SNPs: 16 Variation explained (R2): 4.3% F statistic: 22.19	rs7868774	A	G	0.2709	-0.0188	0.0039	1.779e-06
Serotonin (5Ht)_ K = 16_ R2 = 4.3% _F = 22.19	rs5764174	T	C	0.2445	-0.0194	0.004	9.608e-07
Serotonin (5Ht)_ K = 16_ R2 = 4.3% _F = 22.19	rs988694	A	G	0.477	-0.0145	0.0033	8.39e-06
Serotonin (5Ht)_ K = 16_ R2 = 4.3% _F = 22.19	rs2742351	C	G	0.2209	-0.0235	0.0046	3.227e-07
Serotonin (5Ht)_ K = 16_ R2 = 4.3% _F = 22.19	rs6466265	A	G	0.7977	0.0186	0.004	4.146e-06
Serotonin (5Ht)_ K = 16_ R2 = 4.3% _F = 22.19	rs11781043	T	C	0.6731	-0.0187	0.0042	8.808e-06
Serotonin (5Ht)_ K = 16_ R2 = 4.3% _F = 22.19	rs12646122	T	C	0.0308	-0.0497	0.0104	1.802e-06
Serotonin (5Ht)_ K = 16_ R2 = 4.3% _F = 22.19	rs2036136	T	C	0.4587	-0.0256	0.0056	5.114e-06
Serotonin (5Ht)_ K = 16_ R2 = 4.3% _F = 22.19	rs17708932	A	G	0.0376	-0.0766	0.0171	7.215e-06
Serotonin (5Ht)_ K = 16_ R2 = 4.3% _F = 22.19	rs2272784	T	G	0.5681	-0.0144	0.0032	9.528e-06
Serotonin (5Ht)_ K = 16_ R2 = 4.3% _F = 22.19	rs10881427	T	G	0.5558	-0.015	0.0032	3.688e-06
Serotonin (5Ht)_ K = 16_ R2 = 4.3% _F = 22.19	rs825278	T	C	0.0201	-0.0913	0.0192	2.062e-06
Serotonin (5Ht)_ K = 16_ R2 = 4.3% _F = 22.19	rs34724	T	G	0.4415	-0.0153	0.0033	3.198e-06
Serotonin (5Ht)_ K = 16_ R2 = 4.3% _F = 22.19	rs10516056	T	C	0.1978	-0.0222	0.0045	6.992e-07
Serotonin (5Ht)_ K = 16_ R2 = 4.3% _F = 22.19	rs6963218	A	C	0.8479	0.0216	0.0048	6.284e-06
Serotonin (5Ht)_ K = 16_ R2 = 4.3% _F = 22.19	rs9953702	A	G	0.3601	0.0146	0.0033	9.22e-06
Gamma-Glutamylglutamine Number of SNPs: 22 Variation explained (R2): 6.5% F statistic: 24.82	rs2085545	T	G	0.2883	0.0098	0.0022	9.855e-06
Gamma-Glutamylglutamine_ K = 22_ R2 = 6.5% _F = 24.82	rs2911711	A	T	0.5471	0.0102	0.0021	8.5e-07
Gamma-Glutamylglutamine_ K = 22_ R2 = 6.5% _F = 24.82	rs17602430	T	C	0.079	0.0172	0.0036	1.574e-06
Gamma-Glutamylglutamine_ K = 22_ R2 = 6.5% _F = 24.82	rs2194285	A	G	0.6606	-0.0098	0.0022	4.673e-06
Gamma-Glutamylglutamine_ K = 22_ R2 = 6.5% _F = 24.82	rs9436667	T	C	0.1138	0.0135	0.003	7.3e-06
Gamma-Glutamylglutamine_ K = 22_ R2 = 6.5% _F = 24.82	rs4981468	A	G	0.0509	0.0207	0.0045	4.761e-06
Gamma-Glutamylglutamine_ K = 22_ R2 = 6.5% _F = 24.82	rs6488270	A	G	0.4076	0.0096	0.0021	4.947e-06
Gamma-Glutamylglutamine_ K = 22_ R2 = 6.5% _F = 24.82	rs849039	T	G	0.779	-0.0135	0.0028	1.405e-06
Gamma-Glutamylglutamine_ K = 22_ R2 = 6.5% _F = 24.82	rs4880550	T	C	0.1292	0.015	0.003	6.317e-07
Gamma-Glutamylglutamine_ K = 22_ R2 = 6.5% _F = 24.82	rs10497174	T	C	0.2732	0.0103	0.0022	4.162e-06
Gamma-Glutamylglutamine_ K = 22_ R2 = 6.5% _F = 24.82	rs7068278	T	G	0.1968	0.0116	0.0023	6.545e-07
Gamma-Glutamylglutamine_ K = 22_ R2 = 6.5% _F = 24.82	rs35592	T	C	0.7618	0.0107	0.0022	1.241e-06
Gamma-Glutamylglutamine_ K = 22_ R2 = 6.5% _F = 24.82	rs1751956	T	G	0.8647	0.016	0.0029	2.353e-08
Gamma-Glutamylglutamine_ K = 22_ R2 = 6.5% _F = 24.82	rs10432570	A	G	0.0145	0.0738	0.0138	9.502e-08
Gamma-Glutamylglutamine_ K = 22_ R2 = 6.5% _F = 24.82	rs11151406	A	T	0.9444	0.0301	0.0066	5.611e-06
Gamma-Glutamylglutamine_ K = 22_ R2 = 6.5% _F = 24.82	rs1832664	T	C	0.2818	-0.0097	0.0022	7.735e-06
Gamma-Glutamylglutamine_ K = 22_ R2 = 6.5% _F = 24.82	rs3094600	A	G	0.2637	-0.0099	0.0022	6.213e-06
Gamma-Glutamylglutamine_ K = 22_ R2 = 6.5% _F = 24.82	rs4587207	A	G	0.8566	-0.0129	0.0028	3.194e-06
Gamma-Glutamylglutamine_ K = 22_ R2 = 6.5% _F = 24.82	rs1952313	A	G	0.2247	-0.0111	0.0023	1.113e-06
Gamma-Glutamylglutamine_ K = 22_ R2 = 6.5% _F = 24.82	rs832404	T	C	0.8684	-0.013	0.0029	7.525e-06
Gamma-Glutamylglutamine_ K = 22_ R2 = 6.5% _F = 24.82	rs3931670	C	G	0.2941	0.0099	0.0021	4.34e-06
Gamma-Glutamylglutamine_ K = 22_ R2 = 6.5% _F = 24.82	rs17041868	T	C	0.939	0.0196	0.0042	4.018e-06
Gamma-Glutamylglutamine_ K = 22_ R2 = 6.5% _F = 24.82	rs7302925	A	G	0.2005	-0.0204	0.0027	5.108e-14
Gamma-Glutamyltyrosine Number of SNPs: 48 Variation explained (R2): 12.5% F statistic: 23.21	rs1560792	A	G	0.3354	0.009	0.0018	3.331e-07
Gamma-Glutamyltyrosine_ K = 48_ R2 = 12.5% _F = 23.21	rs2573124	A	C	0.4569	-0.008	0.0017	3.786e-06
Gamma-Glutamyltyrosine_ K = 48_ R2 = 12.5% _F = 23.21	rs2504282	A	G	0.9338	0.0191	0.0042	6.703e-06
Gamma-Glutamyltyrosine_ K = 48_ R2 = 12.5% _F = 23.21	rs12429206	A	G	0.3376	0.0086	0.0018	1.847e-06
Gamma-Glutamyltyrosine_ K = 48_ R2 = 12.5% _F = 23.21	rs3936152	T	C	0.6051	0.0079	0.0018	5.924e-06
Gamma-Glutamyltyrosine_ K = 48_ R2 = 12.5% _F = 23.21	rs11165454	T	C	0.5583	0.0089	0.0017	2.786e-07
Gamma-Glutamyltyrosine_ K = 48_ R2 = 12.5% _F = 23.21	rs17558863	A	G	0.955	-0.0222	0.005	8.011e-06
Gamma-Glutamyltyrosine_ K = 48_ R2 = 12.5% _F = 23.21	rs10146413	T	C	0.8289	0.0114	0.0025	4.325e-06
Gamma-Glutamyltyrosine_ K = 48_ R2 = 12.5% _F = 23.21	rs13116099	T	C	0.617	-0.0078	0.0017	7.536e-06
Gamma-Glutamyltyrosine_ K = 48_ R2 = 12.5% _F = 23.21	rs10013737	A	G	0.6839	0.0087	0.0018	7.895e-07
Gamma-Glutamyltyrosine_ K = 48_ R2 = 12.5% _F = 23.21	rs848767	T	C	0.0696	-0.0179	0.0039	3.455e-06
Gamma-Glutamyltyrosine_ K = 48_ R2 = 12.5% _F = 23.21	rs11776904	C	G	0.1522	0.0214	0.0048	7.47e-06
Gamma-Glutamyltyrosine_ K = 48_ R2 = 12.5% _F = 23.21	rs12546042	T	C	0.4197	0.0077	0.0017	8.353e-06
Gamma-Glutamyltyrosine_ K = 48_ R2 = 12.5% _F = 23.21	rs12276109	T	C	0.4352	-0.0084	0.0017	1.564e-06
Gamma-Glutamyltyrosine_ K = 48_ R2 = 12.5% _F = 23.21	rs1340971	T	C	0.6654	-0.008	0.0017	4.663e-06
Gamma-Glutamyltyrosine_ K = 48_ R2 = 12.5% _F = 23.21	rs4572660	T	G	0.6118	-0.0088	0.0017	4.685e-07
Gamma-Glutamyltyrosine_ K = 48_ R2 = 12.5% _F = 23.21	rs4777924	A	T	0.618	-0.0079	0.0018	6.792e-06
Gamma-Glutamyltyrosine_ K = 48_ R2 = 12.5% _F = 23.21	rs10208080	T	C	0.3573	-0.0082	0.0018	3.411e-06
Gamma-Glutamyltyrosine_ K = 48_ R2 = 12.5% _F = 23.21	rs8132248	T	C	0.0986	0.018	0.0037	1.431e-06
Gamma-Glutamyltyrosine_ K = 48_ R2 = 12.5% _F = 23.21	rs1039904	A	G	0.4354	0.0079	0.0018	6.954e-06
Gamma-Glutamyltyrosine_ K = 48_ R2 = 12.5% _F = 23.21	rs2396461	T	C	0.121	0.0117	0.0026	8.377e-06
Gamma-Glutamyltyrosine_ K = 48_ R2 = 12.5% _F = 23.21	rs4788450	T	G	0.5401	0.0082	0.0017	2.646e-06
Gamma-Glutamyltyrosine_ K = 48_ R2 = 12.5% _F = 23.21	rs8067801	T	G	0.6509	-0.0079	0.0018	6.626e-06
Gamma-Glutamyltyrosine_ K = 48_ R2 = 12.5% _F = 23.21	rs1022092	A	G	0.5544	-0.0085	0.0017	8.87e-07
Gamma-Glutamyltyrosine_ K = 48_ R2 = 12.5% _F = 23.21	rs2254174	T	C	0.8981	-0.0148	0.0033	7.444e-06
Gamma-Glutamyltyrosine_ K = 48_ R2 = 12.5% _F = 23.21	rs11023332	C	G	0.4335	-0.009	0.0017	1.99e-07
Gamma-Glutamyltyrosine_ K = 48_ R2 = 12.5% _F = 23.21	rs2445976	A	C	0.4652	0.0079	0.0017	6.249e-06
Gamma-Glutamyltyrosine_ K = 48_ R2 = 12.5% _F = 23.21	rs151743	T	C	0.426	-0.009	0.002	6.795e-06
Gamma-Glutamyltyrosine_ K = 48_ R2 = 12.5% _F = 23.21	rs10840070	T	C	0.3602	-0.0079	0.0018	8.346e-06
Gamma-Glutamyltyrosine_ K = 48_ R2 = 12.5% _F = 23.21	rs2111718	A	G	0.8615	-0.0227	0.005	4.996e-06
Gamma-Glutamyltyrosine_ K = 48_ R2 = 12.5% _F = 23.21	rs3819532	T	C	0.3878	0.0078	0.0017	6.905e-06
Gamma-Glutamyltyrosine_ K = 48_ R2 = 12.5% _F = 23.21	rs4781712	A	G	0.4757	-0.0079	0.0017	4.322e-06
Gamma-Glutamyltyrosine_ K = 48_ R2 = 12.5% _F = 23.21	rs2736689	A	C	0.4847	-0.008	0.0017	4.125e-06
Gamma-Glutamyltyrosine_ K = 48_ R2 = 12.5% _F = 23.21	rs17720371	T	C	0.4737	-0.0078	0.0017	6.329e-06
Gamma-Glutamyltyrosine_ K = 48_ R2 = 12.5% _F = 23.21	rs9310707	A	G	0.3473	-0.0082	0.0018	6.378e-06
Gamma-Glutamyltyrosine_ K = 48_ R2 = 12.5% _F = 23.21	rs11199176	A	C	0.5221	0.0077	0.0017	9.328e-06
Gamma-Glutamyltyrosine_ K = 48_ R2 = 12.5% _F = 23.21	rs7625611	T	C	0.6152	-0.0082	0.0018	3.693e-06
Gamma-Glutamyltyrosine_ K = 48_ R2 = 12.5% _F = 23.21	rs324293	T	C	0.3905	0.008	0.0017	4.733e-06
Gamma-Glutamyltyrosine_ K = 48_ R2 = 12.5% _F = 23.21	rs956966	A	G	0.4858	-0.0101	0.0018	1.475e-08
Gamma-Glutamyltyrosine_ K = 48_ R2 = 12.5% _F = 23.21	rs17100152	C	G	0.3554	-0.0085	0.0018	1.378e-06
Gamma-Glutamyltyrosine_ K = 48_ R2 = 12.5% _F = 23.21	rs17593458	C	G	0.8978	0.0144	0.0032	7.088e-06
Gamma-Glutamyltyrosine_ K = 48_ R2 = 12.5% _F = 23.21	rs17616555	A	G	0.1597	-0.0112	0.0025	9.579e-06
Gamma-Glutamyltyrosine_ K = 48_ R2 = 12.5% _F = 23.21	rs353620	A	G	0.6613	-0.0077	0.0017	9.8e-06
Gamma-Glutamyltyrosine_ K = 48_ R2 = 12.5% _F = 23.21	rs10774085	A	C	0.6817	0.008	0.0018	7.6e-06
Gamma-Glutamyltyrosine_ K = 48_ R2 = 12.5% _F = 23.21	rs1418942	A	C	0.5768	-0.0077	0.0017	9.848e-06
Gamma-Glutamyltyrosine_ K = 48_ R2 = 12.5% _F = 23.21	rs17115614	T	C	0.3631	0.0081	0.0017	3.979e-06
Gamma-Glutamyltyrosine_ K = 48_ R2 = 12.5% _F = 23.21	rs12897043	C	G	0.4802	-0.0079	0.0017	5.648e-06
Gamma-Glutamyltyrosine_ K = 48_ R2 = 12.5% _F = 23.21	rs6456786	T	C	0.3582	-0.008	0.0018	5.665e-06
Gamma-Glutamyltyrosine_ K = 48_ R2 = 12.5% _F = 23.21	rs5751902	T	C	0.3762	0.012	0.0025	2.381e-06
Gamma-Glutamyltyrosine_ K = 48_ R2 = 12.5% _F = 23.21	rs5010651	T	C	0.8332	-0.0132	0.0025	1.765e-07
Hypoxanthine Number of SNPs: 22 Variation explained (R2): 6.3% F statistic: 23.88	rs11225976	T	C	0.5984	0.0108	0.0024	9.756e-06
Hypoxanthine_ K = 22_ R2 = 6.3% _F = 23.88	rs11922857	A	G	0.3493	0.0123	0.0025	6.51e-07
Hypoxanthine_ K = 22_ R2 = 6.3% _F = 23.88	rs113515	C	G	0.5982	-0.0109	0.0024	8.092e-06
Hypoxanthine_ K = 22_ R2 = 6.3% _F = 23.88	rs2113305	T	G	0.2651	-0.0134	0.0029	4.952e-06
Hypoxanthine_ K = 22_ R2 = 6.3% _F = 23.88	rs6933491	A	G	0.6077	-0.0192	0.0024	3.37e-15
Hypoxanthine_ K = 22_ R2 = 6.3% _F = 23.88	rs10878072	A	G	0.6887	0.0137	0.003	7.135e-06
Hypoxanthine_ K = 22_ R2 = 6.3% _F = 23.88	rs275721	A	C	0.509	-0.016	0.003	9.643e-08
Hypoxanthine_ K = 22_ R2 = 6.3% _F = 23.88	rs17280018	A	T	0.2083	-0.0234	0.0052	6.914e-06
Hypoxanthine_ K = 22_ R2 = 6.3% _F = 23.88	rs2900071	T	C	0.2178	-0.014	0.0031	7.459e-06
Hypoxanthine_ K = 22_ R2 = 6.3% _F = 23.88	rs16948294	A	T	0.0694	-0.041	0.0085	1.354e-06
Hypoxanthine_ K = 22_ R2 = 6.3% _F = 23.88	rs6567408	C	G	0.3922	0.0134	0.003	8.066e-06
Hypoxanthine_ K = 22_ R2 = 6.3% _F = 23.88	rs4147184	A	G	0.6082	0.0112	0.0025	6.728e-06
Hypoxanthine_ K = 22_ R2 = 6.3% _F = 23.88	rs10761006	A	G	0.8323	0.0146	0.0033	8.941e-06
Hypoxanthine_ K = 22_ R2 = 6.3% _F = 23.88	rs11260728	C	G	0.4106	-0.0119	0.0024	8.412e-07
Hypoxanthine_ K = 22_ R2 = 6.3% _F = 23.88	rs3793568	A	T	0.2657	-0.0133	0.003	8.887e-06
Hypoxanthine_ K = 22_ R2 = 6.3% _F = 23.88	rs11595079	T	G	0.0951	-0.0214	0.0045	1.888e-06
Hypoxanthine_ K = 22_ R2 = 6.3% _F = 23.88	rs9379061	C	G	0.9562	-0.0456	0.0099	3.918e-06
Hypoxanthine_ K = 22_ R2 = 6.3% _F = 23.88	rs4776752	A	G	0.1512	0.0178	0.0039	4.234e-06
Hypoxanthine_ K = 22_ R2 = 6.3% _F = 23.88	rs1824583	A	G	0.7906	-0.0145	0.0031	3.381e-06
Hypoxanthine_ K = 22_ R2 = 6.3% _F = 23.88	rs1433818	T	C	0.0808	0.0206	0.0046	6.99e-06
Hypoxanthine_ K = 22_ R2 = 6.3% _F = 23.88	rs2939707	A	C	0.5698	0.0109	0.0024	7.392e-06
Hypoxanthine_ K = 22_ R2 = 6.3% _F = 23.88	rs763874	T	C	0.6524	0.0111	0.0025	6.595e-06
Hypoxanthine_ K = 22_ R2 = 6.3% _F = 23.88	rs10847679	T	C	0.4091	-0.0176	0.004	9.53e-06
Hypoxanthine_ K = 22_ R2 = 6.3% _F = 23.88	rs1587235	A	G	0.3312	-0.0132	0.0029	6.47e-06
Hypoxanthine_ K = 22_ R2 = 6.3% _F = 23.88	rs12478440	A	G	0.1215	-0.0173	0.0039	7.062e-06
Betaine Number of SNPs: 25 Variation explained (R2): 8.2% F statistic: 27.93	rs11943623	A	G	0.1709	-0.0115	0.0026	8.402e-06
Betaine_ K = 25_ R2 = 8.2% _F = 27.93	rs4672596	T	C	0.3957	0.0107	0.0024	7.154e-06
Betaine_ K = 25_ R2 = 8.2% _F = 27.93	rs981715	A	G	0.1652	0.012	0.0026	4.691e-06
Betaine_ K = 25_ R2 = 8.2% _F = 27.93	rs7668550	T	G	0.0157	-0.0368	0.0081	5.536e-06
Betaine_ K = 25_ R2 = 8.2% _F = 27.93	rs12569219	A	C	0.1612	-0.0118	0.0026	5.823e-06
Betaine_ K = 25_ R2 = 8.2% _F = 27.93	rs10928521	C	G	0.2357	0.0123	0.0025	5.884e-07
Betaine_ K = 25_ R2 = 8.2% _F = 27.93	rs4713133	T	C	0.7811	0.0114	0.0026	8.192e-06
Betaine_ K = 25_ R2 = 8.2% _F = 27.93	rs9886534	T	C	0.5101	-0.0079	0.0018	8.744e-06
Betaine_ K = 25_ R2 = 8.2% _F = 27.93	rs2851391	T	C	0.4582	-0.0121	0.0018	1.146e-11
Betaine_ K = 25_ R2 = 8.2% _F = 27.93	rs11701048	T	C	0.096	0.0185	0.0035	1.19e-07
Betaine_ K = 25_ R2 = 8.2% _F = 27.93	rs7126003	T	C	0.6259	0.0185	0.0039	2.575e-06
Betaine_ K = 25_ R2 = 8.2% _F = 27.93	rs7781104	T	C	0.2683	0.0208	0.0047	7.755e-06
Betaine_ K = 25_ R2 = 8.2% _F = 27.93	rs9981490	A	G	0.5207	-0.0079	0.0018	8.29e-06
Betaine_ K = 25_ R2 = 8.2% _F = 27.93	rs10937433	C	G	0.4972	0.008	0.0018	6.622e-06
Betaine_ K = 25_ R2 = 8.2% _F = 27.93	rs495360	A	C	0.497	-0.019	0.003	2.399e-10
Betaine_ K = 25_ R2 = 8.2% _F = 27.93	rs4327704	A	C	0.9547	-0.0219	0.005	9.94e-06
Betaine_ K = 25_ R2 = 8.2% _F = 27.93	rs2396726	T	C	0.5395	-0.0179	0.0039	4.519e-06
Betaine_ K = 25_ R2 = 8.2% _F = 27.93	rs164372	T	C	0.8036	0.012	0.0025	2.641e-06
Betaine_ K = 25_ R2 = 8.2% _F = 27.93	rs4673553	T	G	0.553	0.0155	0.0018	3.622e-18
Betaine_ K = 25_ R2 = 8.2% _F = 27.93	rs17595065	A	G	0.9724	0.0347	0.0078	9.73e-06
Betaine_ K = 25_ R2 = 8.2% _F = 27.93	rs12190141	A	G	0.9723	0.0616	0.0139	9.9e-06
Betaine_ K = 25_ R2 = 8.2% _F = 27.93	rs557302	A	G	0.4959	-0.0192	0.0023	2.443e-16
Betaine_ K = 25_ R2 = 8.2% _F = 27.93	rs4646359	T	C	0.5297	-0.0083	0.0018	3.202e-06
Betaine_ K = 25_ R2 = 8.2% _F = 27.93	rs4714634	A	G	0.4504	0.0083	0.0018	3.631e-06
Betaine_ K = 25_ R2 = 8.2% _F = 27.93	rs10153066	T	G	0.4356	0.0085	0.0018	2.118e-06
Betaine_ K = 25_ R2 = 8.2% _F = 27.93	rs7896866	A	C	0.2982	0.0108	0.0024	8.34e-06
Xanthine Number of SNPs: 5 Variation explained (R2): 1.4% F statistic: 22.64	rs10874852	A	C	0.0333	0.0397	0.0081	1.082e-06
Xanthine_ K = 5_ R2 = 1.4% _F = 22.64	rs4694292	T	C	0.1089	0.0201	0.0045	6.439e-06
Xanthine_ K = 5_ R2 = 1.4% _F = 22.64	rs2837424	T	C	0.1928	-0.0152	0.0034	7.358e-06
Xanthine_ K = 5_ R2 = 1.4% _F = 22.64	rs11681198	T	C	0.112	0.0209	0.0044	1.745e-06
Xanthine_ K = 5_ R2 = 1.4% _F = 22.64	rs11250123	A	G	0.043	-0.0494	0.0097	3.833e-07
Caprate (10:0) Number of SNPs: 30 Variation explained (R2): 7.9% F statistic: 22.18	rs11724216	A	T	0.4762	-0.0082	0.0016	5.64e-07
Caprate (10:0)_ K = 30_ R2 = 7.9% _F = 22.18	rs11196097	A	G	0.1128	0.0111	0.0025	9.828e-06
Caprate (10:0)_ K = 30_ R2 = 7.9% _F = 22.18	rs6828152	T	G	0.359	0.009	0.002	6.795e-06
Caprate (10:0)_ K = 30_ R2 = 7.9% _F = 22.18	rs12586821	T	C	0.1222	0.0129	0.0025	1.615e-07
Caprate (10:0)_ K = 30_ R2 = 7.9% _F = 22.18	rs12136055	T	C	0.0129	-0.0731	0.0153	1.754e-06
Caprate (10:0)_ K = 30_ R2 = 7.9% _F = 22.18	rs12001701	A	G	0.052	-0.0315	0.0066	1.888e-06
Caprate (10:0)_ K = 30_ R2 = 7.9% _F = 22.18	rs6557106	T	C	0.6715	0.0076	0.0017	5.417e-06
Caprate (10:0)_ K = 30_ R2 = 7.9% _F = 22.18	rs7554097	C	G	0.4437	0.0073	0.0016	8.281e-06
Caprate (10:0)_ K = 30_ R2 = 7.9% _F = 22.18	rs2938330	T	C	0.8105	-0.0117	0.0025	2.146e-06
Caprate (10:0)_ K = 30_ R2 = 7.9% _F = 22.18	rs12421541	A	T	0.699	-0.0075	0.0017	7.12e-06
Caprate (10:0)_ K = 30_ R2 = 7.9% _F = 22.18	rs690066	T	C	0.4191	0.0081	0.0017	1.179e-06
Caprate (10:0)_ K = 30_ R2 = 7.9% _F = 22.18	rs4818244	T	C	0.0939	0.0136	0.003	6.608e-06
Caprate (10:0)_ K = 30_ R2 = 7.9% _F = 22.18	rs4812805	C	G	0.8421	-0.0109	0.0024	5.881e-06
Caprate (10:0)_ K = 30_ R2 = 7.9% _F = 22.18	rs4483514	T	G	0.357	0.009	0.002	6.795e-06
Caprate (10:0)_ K = 30_ R2 = 7.9% _F = 22.18	rs1969158	A	G	0.7162	-0.0075	0.0017	7.431e-06
Caprate (10:0)_ K = 30_ R2 = 7.9% _F = 22.18	rs8043217	A	G	0.524	0.009	0.0016	2.793e-08
Caprate (10:0)_ K = 30_ R2 = 7.9% _F = 22.18	rs17695897	T	C	0.153	0.011	0.0025	8.025e-06
Caprate (10:0)_ K = 30_ R2 = 7.9% _F = 22.18	rs8128639	A	C	0.1698	-0.0113	0.0025	6.513e-06
Caprate (10:0)_ K = 30_ R2 = 7.9% _F = 22.18	rs7170215	A	T	0.5459	0.0076	0.0017	4.648e-06
Caprate (10:0)_ K = 30_ R2 = 7.9% _F = 22.18	rs2415675	A	G	0.4772	-0.0073	0.0016	9.078e-06
Caprate (10:0)_ K = 30_ R2 = 7.9% _F = 22.18	rs3907322	T	C	0.1338	0.0111	0.0024	3.782e-06
Caprate (10:0)_ K = 30_ R2 = 7.9% _F = 22.18	rs569114	A	G	0.6199	-0.0079	0.0017	1.991e-06
Caprate (10:0)_ K = 30_ R2 = 7.9% _F = 22.18	rs11008281	T	C	0.3633	-0.008	0.0017	1.44e-06
Caprate (10:0)_ K = 30_ R2 = 7.9% _F = 22.18	rs2725779	T	C	0.4523	0.0077	0.0017	3.274e-06
Caprate (10:0)_ K = 30_ R2 = 7.9% _F = 22.18	rs2118167	C	G	0.4947	-0.0077	0.0017	6.026e-06
Caprate (10:0)_ K = 30_ R2 = 7.9% _F = 22.18	rs7859597	A	G	0.737	-0.009	0.002	6.795e-06
Caprate (10:0)_ K = 30_ R2 = 7.9% _F = 22.18	rs1549556	T	C	0.3719	-0.0075	0.0017	7.952e-06
Caprate (10:0)_ K = 30_ R2 = 7.9% _F = 22.18	rs1576171	A	T	0.984	-0.043	0.009	1.772e-06
Caprate (10:0)_ K = 30_ R2 = 7.9% _F = 22.18	rs1401196	T	G	0.4406	0.0077	0.0016	2.54e-06
Caprate (10:0)_ K = 30_ R2 = 7.9% _F = 22.18	rs9529827	T	C	0.9843	-0.0397	0.0087	5.144e-06
Caprate (10:0)_ K = 30_ R2 = 7.9% _F = 22.18	rs17169194	A	C	0.8806	-0.0117	0.0026	6.647e-06
Caprate (10:0)_ K = 30_ R2 = 7.9% _F = 22.18	rs2720692	A	G	0.0648	-0.0272	0.006	5.631e-06
Caprate (10:0)_ K = 30_ R2 = 7.9% _F = 22.18	rs13227601	A	T	0.5085	0.0075	0.0017	7.181e-06
Caprate (10:0)_ K = 30_ R2 = 7.9% _F = 22.18	rs3781273	A	G	0.5139	0.0074	0.0017	8.523e-06
Caprate (10:0)_ K = 30_ R2 = 7.9% _F = 22.18	rs4436895	C	G	0.252	-0.01	0.0022	3.47e-06
Caprate (10:0)_ K = 30_ R2 = 7.9% _F = 22.18	rs1391933	T	G	0.4399	-0.0075	0.0016	5.785e-06
Phosphate Number of SNPs: 6 Variation explained (R2): 1.7% F statistic: 22.23	rs4295297	A	G	0.0132	0.0458	0.0098	3.031e-06
Phosphate_ K = 6_ R2 = 1.7% _F = 22.23	rs2921879	T	C	0.5999	-0.0055	0.0012	8.665e-06
Phosphate_ K = 6_ R2 = 1.7% _F = 22.23	rs6986632	T	C	0.2408	0.0066	0.0013	3.651e-07
Phosphate_ K = 6_ R2 = 1.7% _F = 22.23	rs4641759	T	C	0.7521	-0.0135	0.003	6.66e-06
Phosphate_ K = 6_ R2 = 1.7% _F = 22.23	rs10404733	A	C	0.9877	-0.0744	0.0158	2.358e-06
Phosphate_ K = 6_ R2 = 1.7% _F = 22.23	rs6126354	T	C	0.7906	-0.0134	0.0029	5.463e-06
3-Methoxytyrosine Number of SNPs: 17 Variation explained (R2): 4.5% F statistic: 21.74	rs11042978	T	G	0.4804	-0.0133	0.0028	1.658e-06
3-Methoxytyrosine_ K = 17_ R2 = 4.5% _F = 21.74	rs7514881	C	G	0.2524	0.012	0.0027	8.532e-06
3-Methoxytyrosine_ K = 17_ R2 = 4.5% _F = 21.74	rs6442530	T	C	0.3254	-0.026	0.0055	2.745e-06
3-Methoxytyrosine_ K = 17_ R2 = 4.5% _F = 21.74	rs12815706	A	G	0.2806	0.019	0.0039	9.104e-07
3-Methoxytyrosine_ K = 17_ R2 = 4.5% _F = 21.74	rs6592988	T	C	0.1439	0.0167	0.0035	2.4e-06
3-Methoxytyrosine_ K = 17_ R2 = 4.5% _F = 21.74	rs10963172	A	G	0.9724	0.0352	0.0078	6.987e-06
3-Methoxytyrosine_ K = 17_ R2 = 4.5% _F = 21.74	rs9323203	A	C	0.7331	-0.0118	0.0027	9.5e-06
3-Methoxytyrosine_ K = 17_ R2 = 4.5% _F = 21.74	rs12662219	A	G	0.6657	0.0117	0.0026	7.912e-06
3-Methoxytyrosine_ K = 17_ R2 = 4.5% _F = 21.74	rs12131781	A	G	0.7091	0.0126	0.0027	2.588e-06
3-Methoxytyrosine_ K = 17_ R2 = 4.5% _F = 21.74	rs10012175	T	C	0.1065	0.0194	0.0043	5.781e-06
3-Methoxytyrosine_ K = 17_ R2 = 4.5% _F = 21.74	rs7908166	A	G	0.9724	-0.0356	0.0079	7.678e-06
3-Methoxytyrosine_ K = 17_ R2 = 4.5% _F = 21.74	rs10800623	A	G	0.2767	-0.0262	0.0058	6.168e-06
3-Methoxytyrosine_ K = 17_ R2 = 4.5% _F = 21.74	rs6448908	T	C	0.0305	0.0843	0.0184	4.697e-06
3-Methoxytyrosine_ K = 17_ R2 = 4.5% _F = 21.74	rs7253109	T	G	0.3395	0.0125	0.0026	2.343e-06
3-Methoxytyrosine_ K = 17_ R2 = 4.5% _F = 21.74	rs339710	A	T	0.3666	0.0126	0.0026	1.768e-06
3-Methoxytyrosine_ K = 17_ R2 = 4.5% _F = 21.74	rs11192702	A	G	0.0456	-0.0275	0.0062	7.881e-06
3-Methoxytyrosine_ K = 17_ R2 = 4.5% _F = 21.74	rs10234744	A	G	0.6113	-0.0119	0.0026	5.204e-06
Pelargonate (9:0) Number of SNPs: 36 Variation explained (R2): 9.3% F statistic: 22.16	rs2421124	C	G	0.5551	-0.0167	0.0036	2.97e-06
Pelargonate (9:0)_ K = 36_ R2 = 9.3% _F = 22.16	rs2710735	A	C	0.4664	-0.0085	0.0017	1.003e-06
Pelargonate (9:0)_ K = 36_ R2 = 9.3% _F = 22.16	rs9033	A	G	0.5521	0.0082	0.0018	4.24e-06
Pelargonate (9:0)_ K = 36_ R2 = 9.3% _F = 22.16	rs1968924	T	G	0.4908	0.0085	0.0018	1.519e-06
Pelargonate (9:0)_ K = 36_ R2 = 9.3% _F = 22.16	rs16944339	A	T	0.1545	-0.0228	0.0049	3.751e-06
Pelargonate (9:0)_ K = 36_ R2 = 9.3% _F = 22.16	rs11895467	T	G	0.3807	0.0094	0.0018	8.425e-08
Pelargonate (9:0)_ K = 36_ R2 = 9.3% _F = 22.16	rs10733353	A	G	0.6481	0.008	0.0018	6.642e-06
Pelargonate (9:0)_ K = 36_ R2 = 9.3% _F = 22.16	rs7642054	T	C	0.5887	-0.0171	0.0037	4.638e-06
Pelargonate (9:0)_ K = 36_ R2 = 9.3% _F = 22.16	rs6661052	A	T	0.5276	0.0078	0.0018	9.649e-06
Pelargonate (9:0)_ K = 36_ R2 = 9.3% _F = 22.16	rs2147618	A	C	0.5036	-0.0081	0.0018	5.308e-06
Pelargonate (9:0)_ K = 36_ R2 = 9.3% _F = 22.16	rs7214330	T	C	0.1256	0.0144	0.0032	9.757e-06
Pelargonate (9:0)_ K = 36_ R2 = 9.3% _F = 22.16	rs4916752	A	G	0.557	-0.009	0.002	6.795e-06
Pelargonate (9:0)_ K = 36_ R2 = 9.3% _F = 22.16	rs12704178	A	T	0.4271	0.0114	0.0024	2.955e-06
Pelargonate (9:0)_ K = 36_ R2 = 9.3% _F = 22.16	rs1229590	A	G	0.505	-0.0084	0.0018	5.231e-06
Pelargonate (9:0)_ K = 36_ R2 = 9.3% _F = 22.16	rs7002819	T	C	0.5269	0.008	0.0018	6.153e-06
Pelargonate (9:0)_ K = 36_ R2 = 9.3% _F = 22.16	rs9513489	T	C	0.5888	0.0078	0.0018	8.48e-06
Pelargonate (9:0)_ K = 36_ R2 = 9.3% _F = 22.16	rs1440492	A	G	0.7102	0.0179	0.004	8.017e-06
Pelargonate (9:0)_ K = 36_ R2 = 9.3% _F = 22.16	rs11734565	T	C	0.0402	0.0248	0.0056	9.288e-06
Pelargonate (9:0)_ K = 36_ R2 = 9.3% _F = 22.16	rs3811290	A	T	0.6086	0.0078	0.0018	9.605e-06
Pelargonate (9:0)_ K = 36_ R2 = 9.3% _F = 22.16	rs4834846	A	G	0.5501	0.0079	0.0018	6.516e-06
Pelargonate (9:0)_ K = 36_ R2 = 9.3% _F = 22.16	rs11937702	A	G	0.1122	0.0157	0.0033	2.387e-06
Pelargonate (9:0)_ K = 36_ R2 = 9.3% _F = 22.16	rs511545	T	C	0.583	0.0081	0.0018	4.633e-06
Pelargonate (9:0)_ K = 36_ R2 = 9.3% _F = 22.16	rs4646880	A	G	0.5434	-0.0085	0.0018	1.498e-06
Pelargonate (9:0)_ K = 36_ R2 = 9.3% _F = 22.16	rs835671	T	C	0.3925	0.0078	0.0018	9.288e-06
Pelargonate (9:0)_ K = 36_ R2 = 9.3% _F = 22.16	rs9093	A	G	0.4867	0.0079	0.0017	6.46e-06
Pelargonate (9:0)_ K = 36_ R2 = 9.3% _F = 22.16	rs754939	A	T	0.5543	0.0079	0.0018	7.823e-06
Pelargonate (9:0)_ K = 36_ R2 = 9.3% _F = 22.16	rs10514491	T	C	0.6801	0.0122	0.0024	6.729e-07
Pelargonate (9:0)_ K = 36_ R2 = 9.3% _F = 22.16	rs1866411	A	C	0.3468	-0.0085	0.0018	1.406e-06
Pelargonate (9:0)_ K = 36_ R2 = 9.3% _F = 22.16	rs10848196	A	G	0.5567	-0.0091	0.0018	2.118e-07
Pelargonate (9:0)_ K = 36_ R2 = 9.3% _F = 22.16	rs4242063	A	T	0.8616	-0.0118	0.0026	4.765e-06
Pelargonate (9:0)_ K = 36_ R2 = 9.3% _F = 22.16	rs1447842	A	G	0.5745	0.0082	0.0017	2.849e-06
Pelargonate (9:0)_ K = 36_ R2 = 9.3% _F = 22.16	rs10749771	A	G	0.178	0.0114	0.0025	6.976e-06
Pelargonate (9:0)_ K = 36_ R2 = 9.3% _F = 22.16	rs10435813	A	G	0.8033	0.0114	0.0026	8.312e-06
Pelargonate (9:0)_ K = 36_ R2 = 9.3% _F = 22.16	rs8079173	A	G	0.1414	0.0119	0.0026	3.422e-06
Pelargonate (9:0)_ K = 36_ R2 = 9.3% _F = 22.16	rs2049534	T	C	0.5044	-0.0082	0.0018	3.175e-06
Pelargonate (9:0)_ K = 36_ R2 = 9.3% _F = 22.16	rs899227	A	G	0.3958	-0.0084	0.0018	2.971e-06
Pelargonate (9:0)_ K = 36_ R2 = 9.3% _F = 22.16	rs1846975	A	G	0.3554	0.0083	0.0018	2.56e-06
Pelargonate (9:0)_ K = 36_ R2 = 9.3% _F = 22.16	rs2286396	T	C	0.1505	0.0117	0.0026	5.595e-06
Pelargonate (9:0)_ K = 36_ R2 = 9.3% _F = 22.16	rs7858722	T	C	0.4666	-0.0079	0.0018	7.26e-06
Pelargonate (9:0)_ K = 36_ R2 = 9.3% _F = 22.16	rs17086533	T	C	0.0118	-0.0768	0.0166	3.734e-06
Pelargonate (9:0)_ K = 36_ R2 = 9.3% _F = 22.16	rs4848532	T	C	0.4842	-0.0079	0.0018	9.764e-06
Pelargonate (9:0)_ K = 36_ R2 = 9.3% _F = 22.16	rs6490236	C	G	0.5593	-0.0085	0.0018	1.764e-06
Pelargonate (9:0)_ K = 36_ R2 = 9.3% _F = 22.16	rs630782	T	C	0.4728	0.0077	0.0017	9.38e-06
Undecanoate (11:0) Number of SNPs: 27 Variation explained (R2): 7.5% F statistic: 23.3	rs11912450	A	T	0.1939	-0.0078	0.0018	8.581e-06
Undecanoate (11:0)_ K = 27_ R2 = 7.5% _F = 23.3	rs10839561	C	G	0.9453	-0.0177	0.0039	6.461e-06
Undecanoate (11:0)_ K = 27_ R2 = 7.5% _F = 23.3	rs2944760	T	G	0.823	-0.0078	0.0018	9.077e-06
Undecanoate (11:0)_ K = 27_ R2 = 7.5% _F = 23.3	rs12136055	T	C	0.0133	-0.0647	0.0147	9.978e-06
Undecanoate (11:0)_ K = 27_ R2 = 7.5% _F = 23.3	rs7279224	A	T	0.6952	0.0077	0.0017	6.868e-06
Undecanoate (11:0)_ K = 27_ R2 = 7.5% _F = 23.3	rs1216886	A	G	0.858	-0.008	0.0018	6.882e-06
Undecanoate (11:0)_ K = 27_ R2 = 7.5% _F = 23.3	rs17103129	T	C	0.9595	-0.0154	0.0035	8.975e-06
Undecanoate (11:0)_ K = 27_ R2 = 7.5% _F = 23.3	rs4111787	T	C	0.2	-0.0085	0.0017	9.422e-07
Undecanoate (11:0)_ K = 27_ R2 = 7.5% _F = 23.3	rs4519482	A	T	0.291	-0.0091	0.0017	8.791e-08
Undecanoate (11:0)_ K = 27_ R2 = 7.5% _F = 23.3	rs17094526	T	C	0.0651	0.0125	0.0026	1.981e-06
Undecanoate (11:0)_ K = 27_ R2 = 7.5% _F = 23.3	rs196887	A	G	0.1442	0.008	0.0018	8.099e-06
Undecanoate (11:0)_ K = 27_ R2 = 7.5% _F = 23.3	rs4555589	A	G	0.0293	0.0181	0.0041	9.615e-06
Undecanoate (11:0)_ K = 27_ R2 = 7.5% _F = 23.3	rs6056344	C	G	0.4609	-0.0083	0.0016	3.412e-07
Undecanoate (11:0)_ K = 27_ R2 = 7.5% _F = 23.3	rs1122530	A	G	0.8519	-0.0094	0.0018	1.491e-07
Undecanoate (11:0)_ K = 27_ R2 = 7.5% _F = 23.3	rs1864609	A	C	0.8606	-0.0091	0.0018	3.265e-07
Undecanoate (11:0)_ K = 27_ R2 = 7.5% _F = 23.3	rs7666900	T	C	0.1418	0.0089	0.0018	6.927e-07
Undecanoate (11:0)_ K = 27_ R2 = 7.5% _F = 23.3	rs2471075	A	G	0.9318	-0.0176	0.0036	8.386e-07
Undecanoate (11:0)_ K = 27_ R2 = 7.5% _F = 23.3	rs170631	C	G	0.8913	-0.0208	0.0043	1.777e-06
Undecanoate (11:0)_ K = 27_ R2 = 7.5% _F = 23.3	rs17233321	A	G	0.9519	-0.0175	0.0034	3.736e-07
Undecanoate (11:0)_ K = 27_ R2 = 7.5% _F = 23.3	rs10848196	A	G	0.5525	-0.0072	0.0016	9.296e-06
Undecanoate (11:0)_ K = 27_ R2 = 7.5% _F = 23.3	rs6967282	A	G	0.797	0.0088	0.0017	3.962e-07
Undecanoate (11:0)_ K = 27_ R2 = 7.5% _F = 23.3	rs1393002	A	C	0.9288	0.0119	0.0027	8.631e-06
Undecanoate (11:0)_ K = 27_ R2 = 7.5% _F = 23.3	rs10435813	A	G	0.8067	0.0081	0.0018	4.009e-06
Undecanoate (11:0)_ K = 27_ R2 = 7.5% _F = 23.3	rs17145331	T	C	0.8525	-0.0091	0.0018	3.582e-07
Undecanoate (11:0)_ K = 27_ R2 = 7.5% _F = 23.3	rs7134822	A	G	0.9597	-0.0164	0.0035	3.872e-06
Undecanoate (11:0)_ K = 27_ R2 = 7.5% _F = 23.3	rs16883391	A	C	0.1921	-0.0084	0.0017	1.199e-06
Undecanoate (11:0)_ K = 27_ R2 = 7.5% _F = 23.3	rs1408276	A	C	0.955	-0.043	0.0094	4.59e-06
Undecanoate (11:0)_ K = 27_ R2 = 7.5% _F = 23.3	rs686321	T	C	0.8232	0.0082	0.0017	2.138e-06
Beta-Hydroxyisovalerate Number of SNPs: 23 Variation explained (R2): 6.1% F statistic: 22.13	rs2136331	A	G	0.6682	-0.0119	0.0027	8.23e-06
Beta-Hydroxyisovalerate_ K = 23_ R2 = 6.1% _F = 22.13	rs6477873	T	C	0.6394	0.0131	0.0027	9.506e-07
Beta-Hydroxyisovalerate_ K = 23_ R2 = 6.1% _F = 22.13	rs17477579	T	C	0.2495	-0.0133	0.0027	1.01e-06
Beta-Hydroxyisovalerate_ K = 23_ R2 = 6.1% _F = 22.13	rs12950972	T	C	0.6497	-0.0133	0.0027	9.841e-07
Beta-Hydroxyisovalerate_ K = 23_ R2 = 6.1% _F = 22.13	rs9347123	A	T	0.4964	-0.0121	0.0026	5.024e-06
Beta-Hydroxyisovalerate_ K = 23_ R2 = 6.1% _F = 22.13	rs789195	A	G	0.7657	-0.0128	0.0027	2.526e-06
Beta-Hydroxyisovalerate_ K = 23_ R2 = 6.1% _F = 22.13	rs3209233	A	C	0.8814	0.041	0.0093	9.953e-06
Beta-Hydroxyisovalerate_ K = 23_ R2 = 6.1% _F = 22.13	rs7178596	A	G	0.3535	-0.012	0.0027	7.922e-06
Beta-Hydroxyisovalerate_ K = 23_ R2 = 6.1% _F = 22.13	rs7660017	A	G	0.3331	-0.0131	0.0028	2.339e-06
Beta-Hydroxyisovalerate_ K = 23_ R2 = 6.1% _F = 22.13	rs529736	A	C	0.1671	-0.0159	0.0035	5.867e-06
Beta-Hydroxyisovalerate_ K = 23_ R2 = 6.1% _F = 22.13	rs1448817	A	G	0.7393	0.0124	0.0027	4.563e-06
Beta-Hydroxyisovalerate_ K = 23_ R2 = 6.1% _F = 22.13	rs7720978	T	C	0.2073	0.0302	0.0067	7.505e-06
Beta-Hydroxyisovalerate_ K = 23_ R2 = 6.1% _F = 22.13	rs6953928	T	C	0.9353	-0.0236	0.0053	7.569e-06
Beta-Hydroxyisovalerate_ K = 23_ R2 = 6.1% _F = 22.13	rs4746017	A	C	0.7111	0.0121	0.0027	8.643e-06
Beta-Hydroxyisovalerate_ K = 23_ R2 = 6.1% _F = 22.13	rs11858062	T	C	0.9142	0.0213	0.0044	1.654e-06
Beta-Hydroxyisovalerate_ K = 23_ R2 = 6.1% _F = 22.13	rs12325299	C	G	0.6932	0.0122	0.0027	6.937e-06
Beta-Hydroxyisovalerate_ K = 23_ R2 = 6.1% _F = 22.13	rs11605057	T	C	0.8787	-0.0202	0.0043	2.238e-06
Beta-Hydroxyisovalerate_ K = 23_ R2 = 6.1% _F = 22.13	rs943251	T	G	0.3712	0.0118	0.0027	9.899e-06
Beta-Hydroxyisovalerate_ K = 23_ R2 = 6.1% _F = 22.13	rs10455860	T	C	0.1395	0.0188	0.0035	1.048e-07
Beta-Hydroxyisovalerate_ K = 23_ R2 = 6.1% _F = 22.13	rs1337278	A	G	0.6107	0.0124	0.0027	3.677e-06
Beta-Hydroxyisovalerate_ K = 23_ R2 = 6.1% _F = 22.13	rs11869714	A	G	0.7762	-0.0126	0.0027	4.245e-06
Beta-Hydroxyisovalerate_ K = 23_ R2 = 6.1% _F = 22.13	rs905112	A	C	0.5395	-0.0117	0.0026	9.682e-06
Beta-Hydroxyisovalerate_ K = 23_ R2 = 6.1% _F = 22.13	rs10494270	A	G	0.7114	0.0119	0.0027	8.63e-06
Beta-Hydroxyisovalerate_ K = 23_ R2 = 6.1% _F = 22.13	rs9460599	T	C	0.2443	0.0302	0.0066	4.862e-06
Beta-Hydroxyisovalerate_ K = 23_ R2 = 6.1% _F = 22.13	rs6952850	A	G	0.6998	-0.012	0.0027	6.875e-06
Taurodeoxycholate Number of SNPs: 13 Variation explained (R2): 3.5% F statistic: 21.82	rs7961079	A	G	0.6241	0.0527	0.0109	1.456e-06
Taurodeoxycholate_ K = 13_ R2 = 3.5% _F = 21.82	rs7184864	A	G	0.8047	-0.0583	0.0131	9.144e-06
Taurodeoxycholate_ K = 13_ R2 = 3.5% _F = 21.82	rs17403175	A	C	0.1199	0.0713	0.0161	9.263e-06
Taurodeoxycholate_ K = 13_ R2 = 3.5% _F = 21.82	rs8137495	A	G	0.7393	0.0602	0.0135	7.8e-06
Taurodeoxycholate_ K = 13_ R2 = 3.5% _F = 21.82	rs17022499	A	T	0.2267	0.054	0.0122	9.71e-06
Taurodeoxycholate_ K = 13_ R2 = 3.5% _F = 21.82	rs11949031	A	G	0.1629	0.0662	0.0138	1.522e-06
Taurodeoxycholate_ K = 13_ R2 = 3.5% _F = 21.82	rs4604097	T	C	0.0503	0.1484	0.0295	4.818e-07
Taurodeoxycholate_ K = 13_ R2 = 3.5% _F = 21.82	rs1153699	T	G	0.2385	0.0602	0.013	3.891e-06
Taurodeoxycholate_ K = 13_ R2 = 3.5% _F = 21.82	rs1898906	A	G	0.0296	0.1378	0.0299	4.087e-06
Taurodeoxycholate_ K = 13_ R2 = 3.5% _F = 21.82	rs4896370	A	G	0.3542	0.0555	0.0121	4.191e-06
Taurodeoxycholate_ K = 13_ R2 = 3.5% _F = 21.82	rs11241932	A	G	0.7276	0.061	0.0125	1.054e-06
Taurodeoxycholate_ K = 13_ R2 = 3.5% _F = 21.82	rs10975331	T	C	0.0361	0.1208	0.0273	9.601e-06
Taurodeoxycholate_ K = 13_ R2 = 3.5% _F = 21.82	rs2032297	C	G	0.7857	0.057	0.0123	3.852e-06
X-02973 Number of SNPs: 23 Variation explained (R2): 6.1% F statistic: 21.95	rs8046494	A	G	0.9288	0.0138	0.003	4.079e-06
X-02973_ K = 23_ R2 = 6.1% _F = 21.95	rs7068714	A	C	0.1774	0.008	0.0017	2.966e-06
X-02973_ K = 23_ R2 = 6.1% _F = 21.95	rs10502656	A	G	0.923	-0.0114	0.0026	8.051e-06
X-02973_ K = 23_ R2 = 6.1% _F = 21.95	rs7914384	T	C	0.1806	-0.0082	0.0017	1.85e-06
X-02973_ K = 23_ R2 = 6.1% _F = 21.95	rs2422370	A	G	0.8094	-0.0084	0.0018	5.964e-06
X-02973_ K = 23_ R2 = 6.1% _F = 21.95	rs1556988	A	G	0.7923	-0.0077	0.0017	5.861e-06
X-02973_ K = 23_ R2 = 6.1% _F = 21.95	rs11715915	T	C	0.2789	-0.0076	0.0016	3.766e-06
X-02973_ K = 23_ R2 = 6.1% _F = 21.95	rs6129758	T	G	0.843	0.0078	0.0017	7.879e-06
X-02973_ K = 23_ R2 = 6.1% _F = 21.95	rs6924754	A	G	0.0606	0.0154	0.0034	6.425e-06
X-02973_ K = 23_ R2 = 6.1% _F = 21.95	rs699191	T	C	0.1916	0.0076	0.0017	9.912e-06
X-02973_ K = 23_ R2 = 6.1% _F = 21.95	rs580171	T	C	0.2042	0.0079	0.0017	4.44e-06
X-02973_ K = 23_ R2 = 6.1% _F = 21.95	rs10279326	T	C	0.9522	-0.0148	0.0033	6.517e-06
X-02973_ K = 23_ R2 = 6.1% _F = 21.95	rs905508	T	C	0.1655	0.0079	0.0017	5.935e-06
[truncated: 9,173 more rows]

## Sheet: Supplementary Table 2
Supplementary Table 2 Unknown metabolites identified by the Mendelian randomization estimates
Metabolites	IVW		MR-Egger		Weighted median		MR-PRESSO		Pleiotropy test		Heterogeneity test
	β (95% CI)	P-value	β(95% CI)	P-value	β (95% CI)	P-value	β(95% CI)	P-value	Pintercept	PGlobal test	I2	P
X-12855	-0.12(-0.18,-0.06)	6.37e-05	-0.05(-0.24,0.15)	0.6412	-0.11(-0.20,-0.03)	0.0080	-0.12(-0.17,-0.07)	0.0003	0.44	0.76	0	0.73
X-12442	-0.10(-0.16,-0.04)	0.0018	-0.08(-0.20,0.04)	0.1725	-0.08(-0.17,0.01)	0.0566	-0.10(-0.15,-0.04)	0.0054	0.76	0.68	0	0.65
X-11452	0.11(0.04,0.17)	0.0028	0.01(-0.21,0.23)	0.9258	0.08(-0.01,0.17)	0.0684	0.11(0.04,0.17)	0.0242	0.38	0.41	0.03	0.4
X-12230	-0.07(-0.12,-0.02)	0.0043	-0.03(-0.12,0.05)	0.4393	-0.05(-0.13,0.02)	0.1419	-0.07(-0.12,-0.03)	0.0109	0.24	0.55	0	0.76
X-12253	0.09(0.03,0.15)	0.0044	0.14(-0.08,0.36)	0.2210	0.10(0.01,0.19)	0.0255	0.09(0.04,0.14)	0.0102	0.65	0.77	0	0.72
X-11441	0.06(0.01,0.10)	0.0173	0.05(-0.06,0.16)	0.3594	0.04(-0.03,0.10)	0.2779	0.06(0.01,0.10)	0.0286	0.9	0.33	0.09	0.34
X-12236	0.07(0.01,0.13)	0.0222	0.08(-0.07,0.23)	0.2924	0.07(-0.01,0.13)	0.0573	0.07(0.01,0.13)	0.0516	0.89	0.07	0.45	0.07
X-12524	-0.18(-0.34,-0.02)	0.0250	-0.15(-0.62,0.31)	0.5207	-0.21(-0.42,-0.01)	0.0453	-0.18(-0.34,-0.02)	0.0328	0.9	0.13	0.25	0.11
X-11442	0.05(0.01,0.10)	0.0251	0.05(-0.05,0.14)	0.3208	0.05(-0.01,0.11)	0.0869	0.05(0.01,0.10)	0.0351	0.89	0.12	0.29	0.1
X-12212	-0.05(-0.09,-0.01)	0.0255	-0.07(-0.14,0.01)	0.0627	-0.07(-0.13,-0.01)	0.0464	-0.05(-0.09,-0.01)	0.0495	0.49	0.38	0.07	0.37
X-12428	-0.05(-0.10,-0.01)	0.0258	-0.07(-0.17,0.03)	0.163	-0.04(-0.11,0.02)	0.2099	-0.05(-0.10,-0.01)	0.0564	0.65	0.37	0	0.48
X-12776	-0.41(-0.78,-0.03)	0.0347	-0.54(-1.10,0.02)	0.0565	-0.45(-0.90,0.01)	0.0517	NA	NA	0.51	NA	0	0.99
X-03094	0.18(0.01,0.34)	0.0371	0.10(-0.33,0.53)	0.6631	0.18(0.03,0.33)	0.0185	0.18(0.01,0.34)	0.0452	0.69	<0.01	0.67	<0.01
X-11261	-0.06(-0.12,-0.01)	0.0406	-0.12(-0.29,0.05)	0.1593	-0.06(-0.14,0.02)	0.1398	-0.06(-0.12,-0.01)	0.0564	0.48	0.08	0.18	0.24
X-13429	-0.03(-0.07,-0.01)	0.0412	-0.05(-0.12,0.02)	0.1342	-0.05(-0.10,-0.01)	0.0180	-0.03(-0.06,-0.01)	0.0280	0.55	0.75	0	0.87
X-12007	-0.02(-0.04,-0.01)	0.0454	-0.02(-0.05,0.02)	0.3121	-0.01(-0.04,0.02)	0.3958	-0.02(-0.04,-0.01)	0.0313	0.91	0.8	0	0.81

## Sheet: Supplementary Table 3
Supplementary Table 3 Genetic predictors for dihomo-linoleate (20:2n6) and their association with Intelligence
SNP	Gene	CHR	A1	A2	dihomo-linoleate (20:2n6)			Intelligence
					Beta	SE	P value	Beta	SE	P value
rs16839086	-	2	A	C	0.0329	0.0074	8.805e-06	-0.0108586	0.00289485	0.000176
rs9880529	LOC105374229	3	T	C	0.022	0.005	9.877e-06	-0.00388694	0.00397845	0.3283
rs9560579	-	13	A	G	-0.0153	0.0034	6.405e-06	0.00263061	0.00274022	0.3371
rs3793900	SNCG	10	A	C	-0.0154	0.0034	7.412e-06	0.00259383	0.0028535	0.3633
rs2114655	-	2	A	G	0.0309	0.0067	4.019e-06	0.00123621	0.00504577	0.8061
rs1709851	HDAC4	2	A	C	-0.0155	0.0035	7.62e-06	-0.00108444	0.00304618	0.7216
rs1477025	ZNF423	16	T	C	0.0164	0.0034	2.01e-06	-0.000945341	0.00287338	0.7422
rs1348656	-	3	T	C	-0.0202	0.0042	1.516e-06	-0.00066232	0.00336203	0.8438
rs6557244	-	6	T	C	0.0302	0.0067	7.324e-06	-0.000122833	0.00491331	0.9804

## Sheet: Supplementary Table 4
Supplementary Table 4 Genetic predictors for p-acetamidophenylglucuronide and their association with Intelligence
SNP	Gene	CHR	A1	A2	p-acetamidophenylglucuronide			Intelligence
					Beta	SE	P value	Beta	SE	P value
rs11773099	LOC105375162	7	C	G	0.9721	0.1848	1.445e-07	-0.0363006	0.0128225	0.004641
rs10247858	DGKB	7	A	T	-1.4929	0.3337	7.676e-06	-0.0360521	0.015896	0.02331
rs16848159	LOC105374190	3	A	G	-1.7999	0.3054	3.793e-09	-0.0310633	0.0119245	0.009198
rs1529453	-	5	T	G	-1.5302	0.3307	3.708e-06	0.0250271	0.0163362	0.1254
rs159683	TMTC1	12	A	G	1.4929	0.3337	7.676e-06	-0.0228425	0.0155497	0.1418
rs2111849	DPP4	2	A	C	-1.5433	0.3328	3.538e-06	-0.0176194	0.0100855	0.08069
rs12056370	LINC01592	8	A	G	-1.492	0.3339	7.864e-06	-0.0154664	0.00714714	0.03045
rs3114918	ANKRD11	16	A	C	1.2257	0.2647	3.651e-06	0.0145816	0.0163471	0.3723
rs8013127	-	14	A	G	-1.5304	0.3325	4.161e-06	0.0142323	0.00960994	0.1385
rs13376606	LINC01720	1	T	C	1.5263	0.3313	4.08e-06	-0.0140277	0.0131469	0.2859
rs12523722	-	6	C	G	1.5302	0.3307	3.708e-06	-0.0131374	0.0151878	0.3872
rs4838294	ASTN2	9	A	G	-1.8595	0.2997	5.486e-10	-0.0129545	0.0103059	0.2087
rs7279663	HSF2BP	21	T	G	1.5318	0.3275	2.903e-06	0.0125143	0.00893879	0.1616
rs16891501	-	6	A	G	-0.6946	0.155	7.444e-06	-0.0118061	0.00646908	0.06798
rs11589437	POLR3C	1	T	C	-1.6514	0.3214	2.771e-07	-0.0115047	0.00757883	0.1291
rs9892632	-	17	A	G	-1.4923	0.3338	7.825e-06	0.0107731	0.0063746	0.09106
rs8192827	TBXAS1	7	A	G	0.7137	0.1588	6.941e-06	0.0100261	0.00709565	0.1578
rs9959639	-	18	T	C	-0.784	0.1768	9.266e-06	0.00947301	0.00732638	0.1959
rs11697457	-	20	A	G	1.2995	0.2699	1.472e-06	0.00919741	0.00647249	0.1552
rs6818342	STOX2	4	T	C	-0.849	0.1515	2.116e-08	0.00884765	0.00690145	0.1997
rs2077726	PRR16	5	T	G	-0.1686	0.0359	2.71e-06	0.00833189	0.00703707	0.2365
rs6940545	-	6	A	C	1.6279	0.3448	2.345e-06	0.00789134	0.00380489	0.03807
rs4767452	RNFT2	12	T	C	-0.7693	0.1668	3.99e-06	0.00773974	0.00446094	0.08275
rs1462054	-	2	A	G	1.266	0.2721	3.273e-06	0.00698576	0.0125418	0.5777
rs7533009	LINC00624	1	A	G	-0.9539	0.2122	6.934e-06	-0.00689359	0.015811	0.6625
rs4240294	-	4	T	C	-0.3218	0.0686	2.725e-06	0.00667834	0.00626486	0.2866
rs11228158	KMT5B	11	A	T	0.61	0.0865	1.724e-12	-0.00642064	0.00687435	0.3504
rs7663974	-	4	A	T	0.2125	0.048	9.422e-06	-0.00600272	0.00286526	0.03615
rs12104233	-	19	A	G	1.0618	0.1672	2.158e-10	-0.00575433	0.00497349	0.2474
rs16962580	LOC102724214	15	T	C	-1.2674	0.2697	2.615e-06	-0.00565004	0.00630585	0.3702
rs4490621	MIR3660	5	T	C	1.4958	0.3343	7.676e-06	0.0055903	0.0107921	0.6045
rs4767456	RNFT2	12	A	T	1.3013	0.2733	1.918e-06	0.00554509	0.00999115	0.5789
rs6119470	ASIP	20	C	G	-1.8595	0.2997	5.486e-10	-0.00528491	0.0102819	0.6075
rs4516063	-	13	T	G	0.8886	0.1617	3.921e-08	0.00475775	0.00448844	0.2891
rs7620840	CNTN6	3	A	T	-0.621	0.1274	1.086e-06	-0.00468153	0.00357642	0.1905
rs9921315	BANP	16	A	G	0.7395	0.1281	7.822e-09	0.00446201	0.00354691	0.2082
rs2503005	SRSF4	1	T	C	0.4363	0.0977	7.922e-06	0.00411261	0.00318067	0.196
rs986842	-	16	T	C	-1.5302	0.3307	3.708e-06	-0.00409658	0.0070998	0.5639
rs4272622	CHIAP2	1	T	C	-0.1674	0.0372	6.751e-06	0.00392038	0.00357047	0.272
rs2287296	NTMT1	9	T	C	-1.2634	0.2721	3.441e-06	-0.00389244	0.00876676	0.6571
rs4527784	LOC105375170	7	A	G	1.0631	0.2119	5.254e-07	0.00344154	0.00541122	0.5246
rs197623	DAB1	1	A	C	-0.982	0.2157	5.316e-06	-0.00341246	0.007154	0.6335
rs2365913	-	12	T	C	1.0329	0.2136	1.336e-06	0.00339624	0.00300818	0.2591
rs17421736	PKP4	2	A	G	-1.5595	0.3448	6.088e-06	-0.0032231	0.0103637	0.7557
rs7672448	-	4	A	G	-1.6006	0.3587	8.119e-06	0.00312166	0.00732784	0.6703
rs7520433	-	1	C	G	-0.8675	0.1889	4.378e-06	0.00299963	0.00663635	0.6511
rs355924	CMTM4	16	A	G	-0.7952	0.1752	5.697e-06	0.00256131	0.0082623	0.7567
rs7231643	CABLES1	18	A	G	-0.5075	0.1149	9.967e-06	-0.00237384	0.00804693	0.7681
rs2028039	-	7	A	C	-1.5512	0.33	2.584e-06	0.00215335	0.00660536	0.7442
rs16834824	RYR2	1	T	C	-1.557	0.3291	2.227e-06	-0.00179266	0.00853646	0.834
rs12417185	-	11	A	T	-0.2877	0.0613	2.705e-06	-0.00140156	0.00405074	0.729
rs10074690	C5orf66	5	C	G	0.5873	0.1215	1.326e-06	-0.00122822	0.00385022	0.75
rs13011684	FMNL2	2	A	G	-1.8453	0.3873	1.897e-06	0.00112285	0.0175445	0.9486
rs10118205	ADAMTSL1	9	C	G	-0.7381	0.1517	1.135e-06	0.00101572	0.00453447	0.8226
rs11569035	EGF	4	T	C	-0.9284	0.1968	2.391e-06	0.000821631	0.0104004	0.9369
rs4663518	LOC105373937	2	C	G	-1.0035	0.1905	1.387e-07	0.000450412	0.00511831	0.9301
rs1515977	-	2	A	G	-0.9112	0.1799	4.062e-07	0.000375638	0.00521719	0.9422
rs4468280	-	10	A	G	0.1441	0.0325	9.413e-06	0.000371191	0.00579985	0.9488
rs1182658	SLC24A2	9	A	T	-1.2189	0.2756	9.771e-06	-0.000366138	0.0110951	0.9735
rs1244356	-	14	A	C	-0.618	0.1355	5.132e-06	-0.000246364	0.00342172	0.9428
rs7123491	CAND1.11	11	A	C	-1.7152	0.3637	2.404e-06	-0.000137909	0.00985067	0.9891
rs1540294	APOL6	22	A	C	-1.692	0.318	1.037e-07	7.43253e-05	0.00825836	0.9932
rs7258950	-	19	A	G	-0.9642	0.2174	9.15e-06	7.34057e-05	0.0040781	0.9853
